# Supplementary material
Source: publisher figshare collection journal article supplement (https://acs.figshare.com/ndownloader/files/4209451)
Supplement: Supplementary file 1 [file 4209451]

 
 
data_complex1 
 
_audit_creation_method            SHELXL-97 
_chemical_name_systematic 
; 
 ? 
; 
_chemical_name_common             ? 
_chemical_melting_point           ? 
_chemical_formula_moiety          ? 
_chemical_formula_sum 
 'C20 H18 Ag2 F6 N8 O6 S2' 
_chemical_formula_weight          860.25 
 
loop_ 
 _atom_type_symbol 
 _atom_type_description 
 _atom_type_scat_dispersion_real 
 _atom_type_scat_dispersion_imag 
 _atom_type_scat_source 
 'C'  'C'   0.0033   0.0016 
 'International Tables Vol C Tables 4.2.6.8 and 6.1.1.4' 
 'H'  'H'   0.0000   0.0000 
 'International Tables Vol C Tables 4.2.6.8 and 6.1.1.4' 
 'N'  'N'   0.0061   0.0033 
 'International Tables Vol C Tables 4.2.6.8 and 6.1.1.4' 
 'O'  'O'   0.0106   0.0060 
 'International Tables Vol C Tables 4.2.6.8 and 6.1.1.4' 
 'F'  'F'   0.0171   0.0103 
 'International Tables Vol C Tables 4.2.6.8 and 6.1.1.4' 
 'S'  'S'   0.1246   0.1234 
 'International Tables Vol C Tables 4.2.6.8 and 6.1.1.4' 
 'Ag'  'Ag'  -0.8971   1.1015 
 'International Tables Vol C Tables 4.2.6.8 and 6.1.1.4' 
 
_symmetry_cell_setting            Triclinic 
_symmetry_space_group_name_H-M    P-1 
 
loop_ 
 _symmetry_equiv_pos_as_xyz 
 'x, y, z' 
 '-x, -y, -z' 
 
_cell_length_a                    10.506(7) 
_cell_length_b                    11.575(8) 
_cell_length_c                    12.026(8) 
_cell_angle_alpha                 82.328(14) 
_cell_angle_beta                  77.199(14) 
_cell_angle_gamma                 83.932(13) 
_cell_volume                      1408.8(17) 
_cell_formula_units_Z             2 
_cell_measurement_temperature     293(2) 
_cell_measurement_reflns_used     ? 
_cell_measurement_theta_min       ? 
_cell_measurement_theta_max       ? 
 
_exptl_crystal_description        needle 
_exptl_crystal_colour             colorless 
_exptl_crystal_size_max           0.32 
_exptl_crystal_size_mid           0.20 
_exptl_crystal_size_min           0.12 
_exptl_crystal_density_meas       ? 
_exptl_crystal_density_diffrn     2.018 
_exptl_crystal_density_method     'not measured' 
_exptl_crystal_F_000              836 
_exptl_absorpt_coefficient_mu     1.630 
_exptl_absorpt_correction_type    multi-scan 
_exptl_absorpt_correction_T_min   0.620994 
_exptl_absorpt_correction_T_max   1.000000 
_exptl_absorpt_process_details    sadabs 
 
_exptl_special_details 
; 
 ? 
; 
 
_diffrn_ambient_temperature       293(2) 
_diffrn_radiation_wavelength      0.71073 
_diffrn_radiation_type            MoK\a 
_diffrn_radiation_source          'fine-focus sealed tube' 
_diffrn_radiation_monochromator   graphite 
_diffrn_measurement_device_type   ? 
_diffrn_measurement_method        ? 
_diffrn_detector_area_resol_mean  ? 
_diffrn_standards_number          ? 
_diffrn_standards_interval_count  ? 
_diffrn_standards_interval_time   ? 
_diffrn_standards_decay_%         ? 
_diffrn_reflns_number             9523 
_diffrn_reflns_av_R_equivalents   0.0204 
_diffrn_reflns_av_sigmaI/netI     0.0393 
_diffrn_reflns_limit_h_min        -13 
_diffrn_reflns_limit_h_max        13 
_diffrn_reflns_limit_k_min        -15 
_diffrn_reflns_limit_k_max        14 
_diffrn_reflns_limit_l_min        -15 
_diffrn_reflns_limit_l_max        10 
_diffrn_reflns_theta_min          1.75 
_diffrn_reflns_theta_max          28.30 
_reflns_number_total              6710 
_reflns_number_gt                 5407 
_reflns_threshold_expression      >2sigma(I) 
 
_computing_data_collection        'Bruker Smart ApexII detector'  
_computing_cell_refinement        'Bruker Smart ApexII' 
_computing_data_reduction         'Bruker Saint' 
_computing_structure_solution     'SHELXS-97 (Sheldrick, 1990)' 
_computing_structure_refinement   'SHELXL-97 (Sheldrick, 1997)' 
_computing_molecular_graphics     'Bruker SHELXTL' 
_computing_publication_material   'Bruker SHELXTL' 
 
_refine_special_details 
; 
 Refinement of F^2^ against ALL reflections.  The weighted R-factor wR and 
 goodness of fit S are based on F^2^, conventional R-factors R are based 
 on F, with F set to zero for negative F^2^. The threshold expression of 
 F^2^ > 2sigma(F^2^) is used only for calculating R-factors(gt) etc. and is 
 not relevant to the choice of reflections for refinement.  R-factors based 
 on F^2^ are statistically about twice as large as those based on F, and R- 
 factors based on ALL data will be even larger. 
; 
 
_refine_ls_structure_factor_coef  Fsqd  
_refine_ls_matrix_type            full 
_refine_ls_weighting_scheme       calc  
_refine_ls_weighting_details 
 'calc w=1/[\s^2^(Fo^2^)+(0.0677P)^2^+0.9220P] where P=(Fo^2^+2Fc^2^)/3' 
_atom_sites_solution_primary      direct 
_atom_sites_solution_secondary    difmap 
_atom_sites_solution_hydrogens    geom 
_refine_ls_hydrogen_treatment     constr 
_refine_ls_extinction_method      none 
_refine_ls_extinction_coef        ? 
_refine_ls_number_reflns          6710 
_refine_ls_number_parameters      433 
_refine_ls_number_restraints      20 
_refine_ls_R_factor_all           0.0518 
_refine_ls_R_factor_gt            0.0404 
_refine_ls_wR_factor_ref          0.1190 
_refine_ls_wR_factor_gt           0.1094 
_refine_ls_goodness_of_fit_ref    1.026 
_refine_ls_restrained_S_all       1.028 
_refine_ls_shift/su_max           0.000 
_refine_ls_shift/su_mean          0.000 
 
loop_ 
 _atom_site_label 
 _atom_site_type_symbol 
 _atom_site_fract_x 
 _atom_site_fract_y 
 _atom_site_fract_z 
 _atom_site_U_iso_or_equiv 
 _atom_site_adp_type 
 _atom_site_occupancy 
 _atom_site_symmetry_multiplicity 
 _atom_site_calc_flag 
 _atom_site_refinement_flags 
 _atom_site_disorder_assembly 
 _atom_site_disorder_group 
Ag1 Ag 0.76781(3) 0.42765(2) 0.44482(2) 0.03915(10) Uani 1 1 d . . . 
Ag2 Ag 1.35021(3) 0.18122(3) 0.34285(3) 0.05580(12) Uani 1 1 d . . . 
S1 S 0.52452(9) 0.59564(7) 0.59655(7) 0.03624(19) Uani 1 1 d . . . 
S2 S 1.10111(9) 0.36970(7) 0.45760(7) 0.03319(18) Uani 1 1 d . . . 
N8 N 0.9129(3) 0.2403(2) 0.4359(3) 0.0343(6) Uani 1 1 d . . . 
N7 N 1.1327(3) 0.1604(2) 0.3813(2) 0.0325(6) Uani 1 1 d . . . 
N6 N 1.1388(3) 0.4106(2) 0.6559(2) 0.0331(6) Uani 1 1 d . . . 
N5 N 1.0225(3) 0.2425(3) 0.6615(3) 0.0399(7) Uani 1 1 d . . . 
N4 N 0.2895(3) 0.6440(3) 0.7276(3) 0.0397(7) Uani 1 1 d . . . 
N3 N 0.4648(3) 0.7416(3) 0.7574(3) 0.0374(6) Uani 1 1 d . . . 
N2 N 0.4951(4) 0.4466(3) 0.7914(3) 0.0511(9) Uani 1 1 d . . . 
N1 N 0.6588(3) 0.3934(2) 0.6302(3) 0.0349(6) Uani 1 1 d . . . 
C1 C 0.6898(4) 0.2940(3) 0.6927(4) 0.0463(9) Uani 1 1 d . . . 
H1A H 0.7548 0.2410 0.6587 0.056 Uiso 1 1 calc R . . 
C2 C 0.6285(5) 0.2676(4) 0.8061(4) 0.0612(12) Uani 1 1 d . . . 
H2A H 0.6521 0.1993 0.8494 0.073 Uiso 1 1 calc R . . 
C3 C 0.5311(5) 0.3472(5) 0.8518(4) 0.0657(14) Uani 1 1 d . . . 
H3A H 0.4881 0.3316 0.9279 0.079 Uiso 1 1 calc R . . 
C4 C 0.5619(3) 0.4650(3) 0.6836(3) 0.0353(7) Uani 1 1 d . . . 
C5 C 0.4139(3) 0.6676(3) 0.7065(3) 0.0320(6) Uani 1 1 d . . . 
C6 C 0.2094(4) 0.6955(4) 0.8140(4) 0.0488(9) Uani 1 1 d . . . 
H6A H 0.1211 0.6817 0.8322 0.059 Uiso 1 1 calc R . . 
C7 C 0.2545(5) 0.7680(4) 0.8760(4) 0.0563(11) Uani 1 1 d . . . 
H7A H 0.1993 0.8004 0.9377 0.068 Uiso 1 1 calc R . . 
C8 C 0.3839(4) 0.7908(4) 0.8436(4) 0.0511(10) Uani 1 1 d . . . 
H8A H 0.4161 0.8417 0.8824 0.061 Uiso 1 1 calc R . . 
C9 C 1.0170(5) 0.2224(4) 0.7754(4) 0.0504(10) Uani 1 1 d . . . 
H9A H 0.9748 0.1584 0.8167 0.060 Uiso 1 1 calc R . . 
C10 C 1.0715(5) 0.2929(4) 0.8330(3) 0.0521(10) Uani 1 1 d . . . 
H10A H 1.0675 0.2773 0.9115 0.063 Uiso 1 1 calc R . . 
C11 C 1.1321(4) 0.3876(4) 0.7693(3) 0.0454(9) Uani 1 1 d . . . 
H11A H 1.1694 0.4370 0.8060 0.054 Uiso 1 1 calc R . . 
C12 C 1.0835(3) 0.3352(3) 0.6084(3) 0.0303(6) Uani 1 1 d . . . 
C13 C 1.0415(3) 0.2423(3) 0.4231(3) 0.0284(6) Uani 1 1 d . . . 
C14 C 1.0896(4) 0.0663(3) 0.3524(3) 0.0396(8) Uani 1 1 d . . . 
H14A H 1.1501 0.0077 0.3225 0.048 Uiso 1 1 calc R . . 
C15 C 0.9572(4) 0.0537(3) 0.3659(3) 0.0417(8) Uani 1 1 d . . . 
H15A H 0.9277 -0.0126 0.3469 0.050 Uiso 1 1 calc R . . 
C16 C 0.8710(3) 0.1433(3) 0.4087(3) 0.0379(7) Uani 1 1 d . . . 
H16A H 0.7815 0.1369 0.4192 0.045 Uiso 1 1 calc R . . 
C18 C 1.4657(4) -0.0985(3) 0.4153(4) 0.0516(10) Uani 1 1 d . . . 
C17 C 1.6028(4) -0.1170(4) 0.3402(4) 0.0574(11) Uani 1 1 d . . . 
F11 F 1.6244(4) -0.2250(5) 0.3140(6) 0.146(2) Uani 1 1 d . . . 
F12 F 1.6962(4) -0.1121(6) 0.3933(5) 0.151(2) Uani 1 1 d . . . 
F13 F 1.6271(6) -0.0526(6) 0.2491(5) 0.211(4) Uani 1 1 d . . . 
O1 O 1.4537(4) -0.1475(4) 0.5138(3) 0.0829(12) Uani 1 1 d . . . 
O2 O 1.3839(3) -0.0381(3) 0.3667(4) 0.0745(11) Uani 1 1 d . . . 
O3 O -0.3145(4) 0.7651(4) 0.9051(4) 0.0823(11) Uani 1 1 d . . . 
O4 O -0.0984(4) 0.7575(4) 0.8878(4) 0.0773(11) Uani 1 1 d . . . 
C19 C -0.1988(5) 0.5833(5) 0.8986(4) 0.0665(13) Uani 1 1 d . . . 
C20 C -0.2044(4) 0.7159(4) 0.8969(4) 0.0524(10) Uani 1 1 d . . . 
F21 F -0.3038(11) 0.5274(8) 0.9578(9) 0.103(3) Uani 0.50 1 d PU . . 
F21' F -0.3066(15) 0.5568(9) 0.871(2) 0.188(7) Uani 0.50 1 d P . . 
F22 F -0.1819(12) 0.5365(10) 0.8039(9) 0.097(3) Uani 0.50 1 d PU . . 
F22' F -0.1017(13) 0.5582(9) 0.8046(8) 0.117(3) Uani 0.50 1 d P . . 
F23 F -0.1048(11) 0.5265(11) 0.9537(10) 0.103(4) Uani 0.50 1 d PU . . 
F23' F -0.1825(18) 0.5248(8) 0.9869(7) 0.130(5) Uani 0.50 1 d P . . 
O1W O -0.1007(8) 0.9922(5) 0.9413(6) 0.151(3) Uani 1 1 d D . . 
O2W O -0.3655(19) 0.9952(12) 0.9597(12) 0.131(5) Uani 0.50 1 d P . . 
O2W' O -0.3922(14) 0.9955(9) 0.8944(13) 0.116(4) Uani 0.50 1 d P . . 
H1WB H -0.1044 0.9161 0.9356 0.174 Uiso 1 1 d RD . . 
H1WA H -0.1614 1.0313 0.9040 0.174 Uiso 1 1 d RD . . 
 
loop_ 
 _atom_site_aniso_label 
 _atom_site_aniso_U_11 
 _atom_site_aniso_U_22 
 _atom_site_aniso_U_33 
 _atom_site_aniso_U_23 
 _atom_site_aniso_U_13 
 _atom_site_aniso_U_12 
Ag1 0.03832(16) 0.03684(15) 0.04182(16) -0.00718(11) -0.00434(11) -0.00614(11) 
Ag2 0.03052(16) 0.04883(19) 0.0847(3) -0.01028(16) -0.00015(15) -0.00999(12) 
S1 0.0384(4) 0.0334(4) 0.0351(4) -0.0072(3) -0.0055(3) 0.0050(3) 
S2 0.0413(4) 0.0279(4) 0.0323(4) -0.0058(3) -0.0077(3) -0.0086(3) 
N8 0.0273(14) 0.0321(14) 0.0439(16) -0.0119(12) -0.0053(11) 0.0000(11) 
N7 0.0276(13) 0.0297(13) 0.0391(15) -0.0079(11) -0.0031(11) -0.0003(10) 
N6 0.0381(15) 0.0304(13) 0.0336(14) -0.0092(11) -0.0101(12) -0.0030(11) 
N5 0.0467(18) 0.0343(15) 0.0394(16) -0.0042(12) -0.0067(13) -0.0109(13) 
N4 0.0284(14) 0.0403(16) 0.0527(18) -0.0120(13) -0.0095(13) -0.0029(12) 
N3 0.0342(15) 0.0406(16) 0.0397(16) -0.0113(12) -0.0075(12) -0.0058(12) 
N2 0.048(2) 0.053(2) 0.0414(18) 0.0003(15) 0.0048(14) 0.0090(16) 
N1 0.0319(14) 0.0319(14) 0.0395(15) -0.0064(11) -0.0046(12) 0.0012(11) 
C1 0.041(2) 0.0396(19) 0.052(2) -0.0019(16) -0.0045(17) 0.0067(16) 
C2 0.060(3) 0.050(2) 0.061(3) 0.013(2) -0.004(2) 0.012(2) 
C3 0.064(3) 0.071(3) 0.046(2) 0.012(2) 0.007(2) 0.006(2) 
C4 0.0320(17) 0.0352(17) 0.0379(17) -0.0037(13) -0.0070(13) -0.0008(13) 
C5 0.0285(15) 0.0315(16) 0.0363(17) -0.0065(13) -0.0075(13) 0.0003(12) 
C6 0.0297(18) 0.054(2) 0.059(2) -0.0094(19) 0.0014(16) -0.0022(16) 
C7 0.049(2) 0.064(3) 0.049(2) -0.021(2) 0.0099(19) 0.001(2) 
C8 0.055(2) 0.055(2) 0.048(2) -0.0224(19) -0.0064(18) -0.0098(19) 
C9 0.062(3) 0.043(2) 0.042(2) 0.0027(16) -0.0018(18) -0.0169(18) 
C10 0.075(3) 0.051(2) 0.0314(19) -0.0023(16) -0.0120(18) -0.010(2) 
C11 0.057(2) 0.045(2) 0.0394(19) -0.0100(16) -0.0158(17) -0.0085(17) 
C12 0.0319(16) 0.0263(14) 0.0325(16) -0.0066(12) -0.0059(12) 0.0008(12) 
C13 0.0290(15) 0.0288(14) 0.0284(15) -0.0062(12) -0.0067(12) -0.0010(12) 
C14 0.0340(18) 0.0273(16) 0.057(2) -0.0142(15) -0.0057(16) 0.0021(13) 
C15 0.041(2) 0.0319(17) 0.056(2) -0.0138(16) -0.0109(17) -0.0101(14) 
C16 0.0293(16) 0.0391(18) 0.048(2) -0.0087(15) -0.0089(14) -0.0068(13) 
C18 0.037(2) 0.0350(19) 0.082(3) -0.0041(19) -0.015(2) 0.0025(15) 
C17 0.041(2) 0.060(3) 0.067(3) -0.001(2) -0.009(2) 0.0042(19) 
F11 0.077(3) 0.125(4) 0.227(6) -0.094(4) 0.019(3) 0.017(3) 
F12 0.0406(19) 0.280(7) 0.148(4) -0.089(5) -0.018(2) -0.002(3) 
F13 0.133(4) 0.246(7) 0.152(5) 0.118(5) 0.066(4) 0.060(5) 
O1 0.064(2) 0.077(2) 0.083(3) 0.021(2) 0.0111(19) 0.0111(19) 
O2 0.053(2) 0.0464(17) 0.133(3) -0.0065(19) -0.047(2) 0.0086(14) 
O3 0.052(2) 0.084(3) 0.110(3) -0.016(2) -0.017(2) 0.0044(18) 
O4 0.0470(19) 0.093(3) 0.089(3) 0.009(2) -0.0133(18) -0.0187(18) 
C19 0.066(3) 0.083(4) 0.051(3) -0.023(2) -0.011(2) 0.009(3) 
C20 0.040(2) 0.076(3) 0.040(2) -0.0027(19) -0.0074(16) -0.003(2) 
F21 0.102(3) 0.100(3) 0.104(3) -0.0120(19) -0.0160(19) -0.0101(19) 
F21' 0.188(13) 0.079(6) 0.37(2) -0.056(10) -0.210(15) -0.005(7) 
F22 0.101(3) 0.099(3) 0.091(3) -0.0152(19) -0.020(2) -0.008(2) 
F22' 0.142(9) 0.101(6) 0.085(6) -0.037(5) 0.025(6) 0.030(7) 
F23 0.104(4) 0.101(4) 0.104(4) -0.009(2) -0.028(2) -0.0018(19) 
F23' 0.259(17) 0.079(5) 0.056(5) 0.027(4) -0.057(8) -0.031(8) 
O1W 0.216(8) 0.110(4) 0.132(5) 0.022(4) -0.041(5) -0.076(5) 
O2W 0.201(16) 0.091(8) 0.100(10) 0.009(7) -0.044(9) -0.001(8) 
O2W' 0.141(11) 0.080(7) 0.132(11) 0.001(8) -0.049(10) -0.002(6) 
 
_geom_special_details 
; 
 All esds (except the esd in the dihedral angle between two l.s. planes) 
 are estimated using the full covariance matrix.  The cell esds are taken 
 into account individually in the estimation of esds in distances, angles 
 and torsion angles; correlations between esds in cell parameters are only 
 used when they are defined by crystal symmetry.  An approximate (isotropic) 
 treatment of cell esds is used for estimating esds involving l.s. planes. 
; 
 
loop_ 
 _geom_bond_atom_site_label_1 
 _geom_bond_atom_site_label_2 
 _geom_bond_distance 
 _geom_bond_site_symmetry_2 
 _geom_bond_publ_flag 
Ag1 N1 2.273(3) . ? 
Ag1 N6 2.278(3) 2_766 ? 
Ag1 N8 2.516(3) . ? 
Ag1 N4 2.543(3) 2_666 ? 
Ag2 N3 2.252(3) 2_766 ? 
Ag2 N7 2.260(3) . ? 
Ag2 O2 2.513(4) . ? 
S1 C4 1.780(4) . ? 
S1 C5 1.789(3) . ? 
S2 C12 1.776(4) . ? 
S2 C13 1.792(3) . ? 
N8 C13 1.329(4) . ? 
N8 C16 1.351(4) . ? 
N7 C14 1.338(5) . ? 
N7 C13 1.338(4) . ? 
N6 C11 1.342(5) . ? 
N6 C12 1.347(4) . ? 
N6 Ag1 2.278(3) 2_766 ? 
N5 C12 1.323(4) . ? 
N5 C9 1.348(5) . ? 
N4 C5 1.326(5) . ? 
N4 C6 1.347(5) . ? 
N4 Ag1 2.543(3) 2_666 ? 
N3 C5 1.333(4) . ? 
N3 C8 1.336(5) . ? 
N3 Ag2 2.252(3) 2_766 ? 
N2 C4 1.331(5) . ? 
N2 C3 1.342(6) . ? 
N1 C1 1.339(5) . ? 
N1 C4 1.346(4) . ? 
C1 C2 1.382(6) . ? 
C1 H1A 0.9300 . ? 
C2 C3 1.372(7) . ? 
C2 H2A 0.9300 . ? 
C3 H3A 0.9300 . ? 
C6 C7 1.376(7) . ? 
C6 H6A 0.9300 . ? 
C7 C8 1.372(7) . ? 
C7 H7A 0.9300 . ? 
C8 H8A 0.9300 . ? 
C9 C10 1.378(6) . ? 
C9 H9A 0.9300 . ? 
C10 C11 1.379(6) . ? 
C10 H10A 0.9300 . ? 
C11 H11A 0.9300 . ? 
C14 C15 1.385(5) . ? 
C14 H14A 0.9300 . ? 
C15 C16 1.379(5) . ? 
C15 H15A 0.9300 . ? 
C16 H16A 0.9300 . ? 
C18 O1 1.229(6) . ? 
C18 O2 1.247(5) . ? 
C18 C17 1.531(6) . ? 
C17 F13 1.233(6) . ? 
C17 F12 1.293(6) . ? 
C17 F11 1.313(7) . ? 
O3 C20 1.223(6) . ? 
O4 C20 1.238(6) . ? 
C19 F23' 1.216(9) . ? 
C19 F22 1.296(11) . ? 
C19 F21' 1.326(10) . ? 
C19 F21 1.350(11) . ? 
C19 F23 1.372(13) . ? 
C19 F22' 1.385(9) . ? 
C19 C20 1.527(8) . ? 
F21 F21' 1.061(18) . ? 
F21 F23' 1.390(17) . ? 
F21' F22 1.393(19) . ? 
F22 F22' 0.907(13) . ? 
F22' F23 1.775(15) . ? 
F23 F23' 0.827(18) . ? 
O1W H1WB 0.8980 . ? 
O1W H1WA 0.9075 . ? 
O2W O2W' 0.889(14) . ? 
 
loop_ 
 _geom_angle_atom_site_label_1 
 _geom_angle_atom_site_label_2 
 _geom_angle_atom_site_label_3 
 _geom_angle 
 _geom_angle_site_symmetry_1 
 _geom_angle_site_symmetry_3 
 _geom_angle_publ_flag 
N1 Ag1 N6 131.33(10) . 2_766 ? 
N1 Ag1 N8 97.88(10) . . ? 
N6 Ag1 N8 115.50(11) 2_766 . ? 
N1 Ag1 N4 125.89(11) . 2_666 ? 
N6 Ag1 N4 95.04(11) 2_766 2_666 ? 
N8 Ag1 N4 80.71(10) . 2_666 ? 
N3 Ag2 N7 153.99(11) 2_766 . ? 
N3 Ag2 O2 110.06(12) 2_766 . ? 
N7 Ag2 O2 87.34(11) . . ? 
C4 S1 C5 97.49(17) . . ? 
C12 S2 C13 100.17(15) . . ? 
C13 N8 C16 116.2(3) . . ? 
C13 N8 Ag1 120.2(2) . . ? 
C16 N8 Ag1 120.6(2) . . ? 
C14 N7 C13 116.6(3) . . ? 
C14 N7 Ag2 119.4(2) . . ? 
C13 N7 Ag2 123.7(2) . . ? 
C11 N6 C12 115.9(3) . . ? 
C11 N6 Ag1 120.7(2) . 2_766 ? 
C12 N6 Ag1 123.3(2) . 2_766 ? 
C12 N5 C9 115.5(3) . . ? 
C5 N4 C6 115.8(3) . . ? 
C5 N4 Ag1 111.4(2) . 2_666 ? 
C6 N4 Ag1 128.6(3) . 2_666 ? 
C5 N3 C8 116.6(3) . . ? 
C5 N3 Ag2 116.7(2) . 2_766 ? 
C8 N3 Ag2 123.3(3) . 2_766 ? 
C4 N2 C3 115.7(3) . . ? 
C1 N1 C4 116.0(3) . . ? 
C1 N1 Ag1 118.9(2) . . ? 
C4 N1 Ag1 125.1(2) . . ? 
N1 C1 C2 122.2(4) . . ? 
N1 C1 H1A 118.9 . . ? 
C2 C1 H1A 118.9 . . ? 
C3 C2 C1 116.8(4) . . ? 
C3 C2 H2A 121.6 . . ? 
C1 C2 H2A 121.6 . . ? 
N2 C3 C2 122.9(4) . . ? 
N2 C3 H3A 118.5 . . ? 
C2 C3 H3A 118.5 . . ? 
N2 C4 N1 126.5(3) . . ? 
N2 C4 S1 119.4(3) . . ? 
N1 C4 S1 114.1(3) . . ? 
N4 C5 N3 126.5(3) . . ? 
N4 C5 S1 117.0(3) . . ? 
N3 C5 S1 116.4(3) . . ? 
N4 C6 C7 121.8(4) . . ? 
N4 C6 H6A 119.1 . . ? 
C7 C6 H6A 119.1 . . ? 
C8 C7 C6 117.6(4) . . ? 
C8 C7 H7A 121.2 . . ? 
C6 C7 H7A 121.2 . . ? 
N3 C8 C7 121.6(4) . . ? 
N3 C8 H8A 119.2 . . ? 
C7 C8 H8A 119.2 . . ? 
N5 C9 C10 122.5(4) . . ? 
N5 C9 H9A 118.7 . . ? 
C10 C9 H9A 118.7 . . ? 
C11 C10 C9 117.2(4) . . ? 
C11 C10 H10A 121.4 . . ? 
C9 C10 H10A 121.4 . . ? 
N6 C11 C10 121.8(4) . . ? 
N6 C11 H11A 119.1 . . ? 
C10 C11 H11A 119.1 . . ? 
N5 C12 N6 127.1(3) . . ? 
N5 C12 S2 120.0(3) . . ? 
N6 C12 S2 112.9(2) . . ? 
N8 C13 N7 126.3(3) . . ? 
N8 C13 S2 117.6(2) . . ? 
N7 C13 S2 116.1(2) . . ? 
N7 C14 C15 121.7(3) . . ? 
N7 C14 H14A 119.2 . . ? 
C15 C14 H14A 119.2 . . ? 
C16 C15 C14 117.3(3) . . ? 
C16 C15 H15A 121.4 . . ? 
C14 C15 H15A 121.4 . . ? 
N8 C16 C15 121.8(3) . . ? 
N8 C16 H16A 119.1 . . ? 
C15 C16 H16A 119.1 . . ? 
O1 C18 O2 130.3(5) . . ? 
O1 C18 C17 114.3(4) . . ? 
O2 C18 C17 115.3(5) . . ? 
F13 C17 F12 107.3(6) . . ? 
F13 C17 F11 106.7(6) . . ? 
F12 C17 F11 101.0(5) . . ? 
F13 C17 C18 116.6(4) . . ? 
F12 C17 C18 113.6(4) . . ? 
F11 C17 C18 110.3(4) . . ? 
C18 O2 Ag2 126.5(3) . . ? 
F23' C19 F22 120.9(8) . . ? 
F23' C19 F21' 110.2(12) . . ? 
F22 C19 F21' 64.2(9) . . ? 
F23' C19 F21 65.4(9) . . ? 
F22 C19 F21 98.3(8) . . ? 
F21' C19 F21 46.7(9) . . ? 
F23' C19 F23 36.6(8) . . ? 
F22 C19 F23 105.1(8) . . ? 
F21' C19 F23 136.9(9) . . ? 
F21 C19 F23 99.6(8) . . ? 
F23' C19 F22' 112.7(10) . . ? 
F22 C19 F22' 39.4(6) . . ? 
F21' C19 F22' 103.2(11) . . ? 
F21 C19 F22' 132.8(8) . . ? 
F23 C19 F22' 80.2(7) . . ? 
F23' C19 C20 116.8(6) . . ? 
F22 C19 C20 120.5(6) . . ? 
F21' C19 C20 108.3(6) . . ? 
F21 C19 C20 118.2(6) . . ? 
F23 C19 C20 112.2(7) . . ? 
F22' C19 C20 104.7(6) . . ? 
O3 C20 O4 129.7(5) . . ? 
O3 C20 C19 114.4(5) . . ? 
O4 C20 C19 115.9(4) . . ? 
F21' F21 C19 65.5(9) . . ? 
F21' F21 F23' 115.9(13) . . ? 
C19 F21 F23' 52.7(6) . . ? 
F21 F21' C19 67.8(7) . . ? 
F21 F21' F22 108.5(11) . . ? 
C19 F21' F22 56.9(7) . . ? 
F22' F22 C19 75.6(10) . . ? 
F22' F22 F21' 134.0(13) . . ? 
C19 F22 F21' 59.0(7) . . ? 
F22 F22' C19 65.0(9) . . ? 
F22 F22' F23 99.2(12) . . ? 
C19 F22' F23 49.6(5) . . ? 
F23' F23 C19 61.4(11) . . ? 
F23' F23 F22' 107.0(15) . . ? 
C19 F23 F22' 50.2(6) . . ? 
F23 F23' C19 82.0(11) . . ? 
F23 F23' F21 138.0(15) . . ? 
C19 F23' F21 62.0(7) . . ? 
H1WB O1W H1WA 105.9 . . ? 
 
loop_ 
 _geom_torsion_atom_site_label_1 
 _geom_torsion_atom_site_label_2 
 _geom_torsion_atom_site_label_3 
 _geom_torsion_atom_site_label_4 
 _geom_torsion 
 _geom_torsion_site_symmetry_1 
 _geom_torsion_site_symmetry_2 
 _geom_torsion_site_symmetry_3 
 _geom_torsion_site_symmetry_4 
 _geom_torsion_publ_flag 
N1 Ag1 N8 C13 -113.5(3) . . . . ? 
N6 Ag1 N8 C13 30.1(3) 2_766 . . . ? 
N4 Ag1 N8 C13 121.3(3) 2_666 . . . ? 
N1 Ag1 N8 C16 87.0(3) . . . . ? 
N6 Ag1 N8 C16 -129.4(3) 2_766 . . . ? 
N4 Ag1 N8 C16 -38.2(3) 2_666 . . . ? 
N3 Ag2 N7 C14 103.4(3) 2_766 . . . ? 
O2 Ag2 N7 C14 -30.0(3) . . . . ? 
N3 Ag2 N7 C13 -70.6(4) 2_766 . . . ? 
O2 Ag2 N7 C13 155.9(3) . . . . ? 
N6 Ag1 N1 C1 -133.3(3) 2_766 . . . ? 
N8 Ag1 N1 C1 1.2(3) . . . . ? 
N4 Ag1 N1 C1 85.4(3) 2_666 . . . ? 
N6 Ag1 N1 C4 47.9(3) 2_766 . . . ? 
N8 Ag1 N1 C4 -177.6(3) . . . . ? 
N4 Ag1 N1 C4 -93.4(3) 2_666 . . . ? 
C4 N1 C1 C2 -1.6(6) . . . . ? 
Ag1 N1 C1 C2 179.5(4) . . . . ? 
N1 C1 C2 C3 1.6(8) . . . . ? 
C4 N2 C3 C2 -1.2(8) . . . . ? 
C1 C2 C3 N2 -0.1(9) . . . . ? 
C3 N2 C4 N1 1.2(7) . . . . ? 
C3 N2 C4 S1 -178.7(4) . . . . ? 
C1 N1 C4 N2 0.1(6) . . . . ? 
Ag1 N1 C4 N2 179.0(3) . . . . ? 
C1 N1 C4 S1 -179.9(3) . . . . ? 
Ag1 N1 C4 S1 -1.1(4) . . . . ? 
C5 S1 C4 N2 8.0(4) . . . . ? 
C5 S1 C4 N1 -171.9(3) . . . . ? 
C6 N4 C5 N3 -4.1(5) . . . . ? 
Ag1 N4 C5 N3 155.0(3) 2_666 . . . ? 
C6 N4 C5 S1 177.4(3) . . . . ? 
Ag1 N4 C5 S1 -23.5(3) 2_666 . . . ? 
C8 N3 C5 N4 4.9(5) . . . . ? 
Ag2 N3 C5 N4 -154.8(3) 2_766 . . . ? 
C8 N3 C5 S1 -176.6(3) . . . . ? 
Ag2 N3 C5 S1 23.7(3) 2_766 . . . ? 
C4 S1 C5 N4 -86.4(3) . . . . ? 
C4 S1 C5 N3 95.0(3) . . . . ? 
C5 N4 C6 C7 0.0(6) . . . . ? 
Ag1 N4 C6 C7 -154.9(3) 2_666 . . . ? 
N4 C6 C7 C8 2.9(7) . . . . ? 
C5 N3 C8 C7 -1.4(6) . . . . ? 
Ag2 N3 C8 C7 156.8(4) 2_766 . . . ? 
C6 C7 C8 N3 -2.2(7) . . . . ? 
C12 N5 C9 C10 -0.3(6) . . . . ? 
N5 C9 C10 C11 0.6(7) . . . . ? 
C12 N6 C11 C10 -0.4(6) . . . . ? 
Ag1 N6 C11 C10 177.4(3) 2_766 . . . ? 
C9 C10 C11 N6 -0.3(7) . . . . ? 
C9 N5 C12 N6 -0.5(5) . . . . ? 
C9 N5 C12 S2 178.5(3) . . . . ? 
C11 N6 C12 N5 0.8(5) . . . . ? 
Ag1 N6 C12 N5 -176.9(3) 2_766 . . . ? 
C11 N6 C12 S2 -178.2(3) . . . . ? 
Ag1 N6 C12 S2 4.1(3) 2_766 . . . ? 
C13 S2 C12 N5 -7.8(3) . . . . ? 
C13 S2 C12 N6 171.3(2) . . . . ? 
C16 N8 C13 N7 3.2(5) . . . . ? 
Ag1 N8 C13 N7 -157.2(3) . . . . ? 
C16 N8 C13 S2 179.7(3) . . . . ? 
Ag1 N8 C13 S2 19.4(3) . . . . ? 
C14 N7 C13 N8 -1.7(5) . . . . ? 
Ag2 N7 C13 N8 172.4(3) . . . . ? 
C14 N7 C13 S2 -178.3(3) . . . . ? 
Ag2 N7 C13 S2 -4.2(3) . . . . ? 
C12 S2 C13 N8 83.7(3) . . . . ? 
C12 S2 C13 N7 -99.5(3) . . . . ? 
C13 N7 C14 C15 -0.5(5) . . . . ? 
Ag2 N7 C14 C15 -174.9(3) . . . . ? 
N7 C14 C15 C16 1.1(6) . . . . ? 
C13 N8 C16 C15 -2.4(5) . . . . ? 
Ag1 N8 C16 C15 157.9(3) . . . . ? 
C14 C15 C16 N8 0.5(6) . . . . ? 
O1 C18 C17 F13 -166.5(7) . . . . ? 
O2 C18 C17 F13 14.6(8) . . . . ? 
O1 C18 C17 F12 -40.9(7) . . . . ? 
O2 C18 C17 F12 140.2(5) . . . . ? 
O1 C18 C17 F11 71.6(6) . . . . ? 
O2 C18 C17 F11 -107.3(5) . . . . ? 
O1 C18 O2 Ag2 96.6(6) . . . . ? 
C17 C18 O2 Ag2 -84.7(5) . . . . ? 
N3 Ag2 O2 C18 60.1(5) 2_766 . . . ? 
N7 Ag2 O2 C18 -139.7(5) . . . . ? 
F23' C19 C20 O3 -104.6(11) . . . . ? 
F22 C19 C20 O3 90.7(9) . . . . ? 
F21' C19 C20 O3 20.4(13) . . . . ? 
F21 C19 C20 O3 -29.6(9) . . . . ? 
F23 C19 C20 O3 -144.7(7) . . . . ? 
F22' C19 C20 O3 130.1(7) . . . . ? 
F23' C19 C20 O4 75.2(11) . . . . ? 
F22 C19 C20 O4 -89.5(9) . . . . ? 
F21' C19 C20 O4 -159.8(12) . . . . ? 
F21 C19 C20 O4 150.2(8) . . . . ? 
F23 C19 C20 O4 35.1(8) . . . . ? 
F22' C19 C20 O4 -50.1(8) . . . . ? 
F23' C19 F21 F21' -162.4(12) . . . . ? 
F22 C19 F21 F21' -42.1(10) . . . . ? 
F23 C19 F21 F21' -149.1(11) . . . . ? 
F22' C19 F21 F21' -63.6(14) . . . . ? 
C20 C19 F21 F21' 89.1(10) . . . . ? 
F22 C19 F21 F23' 120.3(9) . . . . ? 
F21' C19 F21 F23' 162.4(12) . . . . ? 
F23 C19 F21 F23' 13.3(10) . . . . ? 
F22' C19 F21 F23' 98.8(12) . . . . ? 
C20 C19 F21 F23' -108.5(8) . . . . ? 
F23' F21 F21' C19 -15.5(10) . . . . ? 
C19 F21 F21' F22 40.6(8) . . . . ? 
F23' F21 F21' F22 25.2(15) . . . . ? 
F23' C19 F21' F21 17.0(12) . . . . ? 
F22 C19 F21' F21 132.5(10) . . . . ? 
F23 C19 F21' F21 47.9(19) . . . . ? 
F22' C19 F21' F21 137.5(10) . . . . ? 
C20 C19 F21' F21 -111.8(8) . . . . ? 
F23' C19 F21' F22 -115.5(11) . . . . ? 
F21 C19 F21' F22 -132.5(10) . . . . ? 
F23 C19 F21' F22 -84.6(17) . . . . ? 
F22' C19 F21' F22 5.1(10) . . . . ? 
C20 C19 F21' F22 115.7(7) . . . . ? 
F23' C19 F22 F22' -88.8(15) . . . . ? 
F21' C19 F22 F22' 172.2(15) . . . . ? 
F21 C19 F22 F22' -154.9(12) . . . . ? 
F23 C19 F22 F22' -52.6(13) . . . . ? 
C20 C19 F22 F22' 75.3(12) . . . . ? 
F23' C19 F22 F21' 99.0(13) . . . . ? 
F21 C19 F22 F21' 32.9(8) . . . . ? 
F23 C19 F22 F21' 135.2(10) . . . . ? 
F22' C19 F22 F21' -172.2(15) . . . . ? 
C20 C19 F22 F21' -96.9(9) . . . . ? 
F21 F21' F22 F22' -57(3) . . . . ? 
C19 F21' F22 F22' -11(2) . . . . ? 
F21 F21' F22 C19 -46.1(9) . . . . ? 
F21' F22 F22' C19 9.3(18) . . . . ? 
C19 F22 F22' F23 36.9(7) . . . . ? 
F21' F22 F22' F23 46(2) . . . . ? 
F23' C19 F22' F22 111.6(13) . . . . ? 
F21' C19 F22' F22 -7.2(14) . . . . ? 
F21 C19 F22' F22 34.9(16) . . . . ? 
F23 C19 F22' F22 128.9(13) . . . . ? 
C20 C19 F22' F22 -120.5(11) . . . . ? 
F23' C19 F22' F23 -17.3(10) . . . . ? 
F22 C19 F22' F23 -128.9(13) . . . . ? 
F21' C19 F22' F23 -136.1(10) . . . . ? 
F21 C19 F22' F23 -94.1(11) . . . . ? 
C20 C19 F22' F23 110.6(7) . . . . ? 
F22 C19 F23 F23' -121.9(14) . . . . ? 
F21' C19 F23 F23' -54(2) . . . . ? 
F21 C19 F23 F23' -20.6(15) . . . . ? 
F22' C19 F23 F23' -152.7(16) . . . . ? 
C20 C19 F23 F23' 105.4(14) . . . . ? 
F23' C19 F23 F22' 152.7(16) . . . . ? 
F22 C19 F23 F22' 30.7(7) . . . . ? 
F21' C19 F23 F22' 98.9(16) . . . . ? 
F21 C19 F23 F22' 132.1(8) . . . . ? 
C20 C19 F23 F22' -102.0(7) . . . . ? 
F22 F22' F23 F23' -21(2) . . . . ? 
C19 F22' F23 F23' 24.9(14) . . . . ? 
F22 F22' F23 C19 -45.6(11) . . . . ? 
F22' F23 F23' C19 -21.7(11) . . . . ? 
C19 F23 F23' F21 30.1(19) . . . . ? 
F22' F23 F23' F21 8(3) . . . . ? 
F22 C19 F23' F23 72.8(17) . . . . ? 
F21' C19 F23' F23 144.1(15) . . . . ? 
F21 C19 F23' F23 157.6(16) . . . . ? 
F22' C19 F23' F23 29.4(17) . . . . ? 
C20 C19 F23' F23 -91.8(15) . . . . ? 
F22 C19 F23' F21 -84.8(11) . . . . ? 
F21' C19 F23' F21 -13.5(10) . . . . ? 
F23 C19 F23' F21 -157.6(16) . . . . ? 
F22' C19 F23' F21 -128.2(10) . . . . ? 
C20 C19 F23' F21 110.5(7) . . . . ? 
F21' F21 F23' F23 -17(3) . . . . ? 
C19 F21 F23' F23 -34(2) . . . . ? 
F21' F21 F23' C19 17.8(11) . . . . ? 
 
_diffrn_measured_fraction_theta_max    0.959 
_diffrn_reflns_theta_full              28.30 
_diffrn_measured_fraction_theta_full   0.959 
_refine_diff_density_max    1.410 
_refine_diff_density_min   -0.721 
_refine_diff_density_rms    0.110 
 


#########################end#####################

 
data_complex2 
 
_audit_creation_method            SHELXL-97 
_chemical_name_systematic 
; 
 ? 
; 
_chemical_name_common             ? 
_chemical_melting_point           ? 
_chemical_formula_moiety          ? 
_chemical_formula_sum 
 'C54 H43 Ag6 F18 N24 O21.50 S12' 
_chemical_formula_weight          2746.01 
 
loop_ 
 _atom_type_symbol 
 _atom_type_description 
 _atom_type_scat_dispersion_real 
 _atom_type_scat_dispersion_imag 
 _atom_type_scat_source 
 'C'  'C'   0.0033   0.0016 
 'International Tables Vol C Tables 4.2.6.8 and 6.1.1.4' 
 'H'  'H'   0.0000   0.0000 
 'International Tables Vol C Tables 4.2.6.8 and 6.1.1.4' 
 'N'  'N'   0.0061   0.0033 
 'International Tables Vol C Tables 4.2.6.8 and 6.1.1.4' 
 'O'  'O'   0.0106   0.0060 
 'International Tables Vol C Tables 4.2.6.8 and 6.1.1.4' 
 'F'  'F'   0.0171   0.0103 
 'International Tables Vol C Tables 4.2.6.8 and 6.1.1.4' 
 'S'  'S'   0.1246   0.1234 
 'International Tables Vol C Tables 4.2.6.8 and 6.1.1.4' 
 'Ag'  'Ag'  -0.8971   1.1015 
 'International Tables Vol C Tables 4.2.6.8 and 6.1.1.4' 
 
_symmetry_cell_setting            Triclinic 
_symmetry_space_group_name_H-M    P-1 
 
loop_ 
 _symmetry_equiv_pos_as_xyz 
 'x, y, z' 
 '-x, -y, -z' 
 
_cell_length_a                    15.692(8) 
_cell_length_b                    16.140(8) 
_cell_length_c                    20.812(11) 
_cell_angle_alpha                 92.159(11) 
_cell_angle_beta                  97.230(11) 
_cell_angle_gamma                 118.277(9) 
_cell_volume                      4576(4) 
_cell_formula_units_Z             2 
_cell_measurement_temperature     293(2) 
_cell_measurement_reflns_used     ? 
_cell_measurement_theta_min       ? 
_cell_measurement_theta_max       ? 
 
_exptl_crystal_description        colorless 
_exptl_crystal_colour             yellow 
_exptl_crystal_size_max           0.36 
_exptl_crystal_size_mid           0.30 
_exptl_crystal_size_min           0.21 
_exptl_crystal_density_meas       ? 
_exptl_crystal_density_diffrn     1.988 
_exptl_crystal_density_method     'not measured' 
_exptl_crystal_F_000              2672 
_exptl_absorpt_coefficient_mu     1.647 
_exptl_absorpt_correction_type    multi-scan 
_exptl_absorpt_correction_T_min   0.788348 
_exptl_absorpt_correction_T_max   1.000000 
_exptl_absorpt_process_details    sadabs 
 
_exptl_special_details 
; 
 ? 
; 
 
_diffrn_ambient_temperature       293(2) 
_diffrn_radiation_wavelength      0.71073 
_diffrn_radiation_type            MoK\a 
_diffrn_radiation_source          'fine-focus sealed tube' 
_diffrn_radiation_monochromator   graphite 
_diffrn_measurement_device_type   ? 
_diffrn_measurement_method        ? 
_diffrn_detector_area_resol_mean  ? 
_diffrn_standards_number          ? 
_diffrn_standards_interval_count  ? 
_diffrn_standards_interval_time   ? 
_diffrn_standards_decay_%         ? 
_diffrn_reflns_number             24896 
_diffrn_reflns_av_R_equivalents   0.0321 
_diffrn_reflns_av_sigmaI/netI     0.0625 
_diffrn_reflns_limit_h_min        -18 
_diffrn_reflns_limit_h_max        11 
_diffrn_reflns_limit_k_min        -19 
_diffrn_reflns_limit_k_max        19 
_diffrn_reflns_limit_l_min        -23 
_diffrn_reflns_limit_l_max        24 
_diffrn_reflns_theta_min          1.44 
_diffrn_reflns_theta_max          25.01 
_reflns_number_total              16033 
_reflns_number_gt                 10020 
_reflns_threshold_expression      >2sigma(I) 
 
_computing_data_collection        'Bruker Smart ApexII detector' 
_computing_cell_refinement        'Bruker Smart ApexII'   
_computing_data_reduction         'Bruker Saint' 
_computing_structure_solution     'SHELXS-97 (Sheldrick, 1990)' 
_computing_structure_refinement   'SHELXL-97 (Sheldrick, 1997)' 
_computing_molecular_graphics     'Bruker SHELXTL'  
_computing_publication_material   'Bruker SHELXTL'
 
_refine_special_details 
; 
 Refinement of F^2^ against ALL reflections.  The weighted R-factor wR and 
 goodness of fit S are based on F^2^, conventional R-factors R are based 
 on F, with F set to zero for negative F^2^. The threshold expression of 
 F^2^ > 2sigma(F^2^) is used only for calculating R-factors(gt) etc. and is 
 not relevant to the choice of reflections for refinement.  R-factors based 
 on F^2^ are statistically about twice as large as those based on F, and R- 
 factors based on ALL data will be even larger. 
; 
 
_refine_ls_structure_factor_coef  Fsqd  
_refine_ls_matrix_type            full 
_refine_ls_weighting_scheme       calc  
_refine_ls_weighting_details 
 'calc w=1/[\s^2^(Fo^2^)+(0.0692P)^2^+6.0613P] where P=(Fo^2^+2Fc^2^)/3' 
_atom_sites_solution_primary      direct 
_atom_sites_solution_secondary    difmap 
_atom_sites_solution_hydrogens    geom 
_refine_ls_hydrogen_treatment     constr
_refine_ls_extinction_method      none 
_refine_ls_extinction_coef        ? 
_refine_ls_number_reflns          16033 
_refine_ls_number_parameters      1256 
_refine_ls_number_restraints      7 
_refine_ls_R_factor_all           0.0865 
_refine_ls_R_factor_gt            0.0486 
_refine_ls_wR_factor_ref          0.1510 
_refine_ls_wR_factor_gt           0.1215 
_refine_ls_goodness_of_fit_ref    1.009 
_refine_ls_restrained_S_all       1.013 
_refine_ls_shift/su_max           0.001 
_refine_ls_shift/su_mean          0.000 
 
loop_ 
 _atom_site_label 
 _atom_site_type_symbol 
 _atom_site_fract_x 
 _atom_site_fract_y 
 _atom_site_fract_z 
 _atom_site_U_iso_or_equiv 
 _atom_site_adp_type 
 _atom_site_occupancy 
 _atom_site_symmetry_multiplicity 
 _atom_site_calc_flag 
 _atom_site_refinement_flags 
 _atom_site_disorder_assembly 
 _atom_site_disorder_group 
Ag1 Ag 0.43573(4) 0.66247(4) 0.25849(3) 0.05312(16) Uani 1 1 d . . . 
Ag2 Ag 0.16255(5) 0.73880(4) 0.13106(4) 0.0791(2) Uani 1 1 d . . . 
Ag3 Ag 0.04148(4) 0.34637(4) 0.22842(3) 0.05050(15) Uani 1 1 d . . . 
Ag4 Ag 0.32070(4) 0.26962(3) 0.34576(3) 0.05849(17) Uani 1 1 d . . . 
Ag5 Ag -0.40959(4) 0.04450(4) 0.23170(3) 0.06334(18) Uani 1 1 d . . . 
Ag6 Ag -0.11360(4) -0.02955(4) 0.26923(3) 0.05740(17) Uani 1 1 d . . . 
S1 S 0.64458(13) 0.87274(12) 0.24217(8) 0.0469(4) Uani 1 1 d . . . 
S2 S 0.38639(12) 0.83286(11) 0.20331(8) 0.0437(4) Uani 1 1 d . . . 
S3 S 0.19739(11) 0.56850(11) 0.18865(8) 0.0421(4) Uani 1 1 d . . . 
S4 S 0.28231(11) 0.44240(11) 0.29691(8) 0.0438(4) Uani 1 1 d . . . 
S5 S -0.16647(13) 0.13978(12) 0.23980(9) 0.0504(4) Uani 1 1 d . . . 
S6 S 0.09048(12) 0.17934(10) 0.28071(8) 0.0410(4) Uani 1 1 d . . . 
N1 N 0.6034(4) 0.6946(4) 0.2539(3) 0.0498(14) Uani 1 1 d . . . 
N2 N 0.7714(4) 0.8082(4) 0.2653(3) 0.0499(14) Uani 1 1 d . . . 
N4 N 0.6344(4) 0.8526(4) 0.3689(3) 0.0495(14) Uani 1 1 d . . . 
N3 N 0.6087(4) 0.9738(4) 0.3230(3) 0.0475(13) Uani 1 1 d . . . 
N5 N 0.3832(4) 0.7546(4) 0.3108(3) 0.0454(13) Uani 1 1 d . . . 
N7 N 0.4240(4) 1.0127(4) 0.2046(3) 0.0549(15) Uani 1 1 d . . . 
N8 N 0.2603(4) 0.8940(4) 0.1641(3) 0.0528(15) Uani 1 1 d . . . 
N9 N 0.3600(4) 0.5902(4) 0.1542(3) 0.0464(13) Uani 1 1 d . . . 
N10 N 0.2175(4) 0.5048(4) 0.0731(3) 0.0562(15) Uani 1 1 d . . . 
N11 N 0.0594(4) 0.5827(3) 0.1083(2) 0.0447(13) Uani 1 1 d . . . 
N12 N 0.0221(4) 0.4281(3) 0.1333(3) 0.0460(13) Uani 1 1 d . . . 
N13 N 0.4573(4) 0.5811(3) 0.3555(3) 0.0477(14) Uani 1 1 d . . . 
N14 N 0.4183(4) 0.4251(3) 0.3776(2) 0.0417(12) Uani 1 1 d . . . 
N15 N 0.2558(5) 0.4763(5) 0.4178(3) 0.0694(18) Uani 1 1 d . . . 
N16 N 0.1169(4) 0.4104(4) 0.3336(3) 0.0472(13) Uani 1 1 d . . . 
N17 N -0.1272(4) 0.3177(4) 0.2337(3) 0.0520(14) Uani 1 1 d . . . 
N18 N -0.2950(4) 0.2046(4) 0.2288(3) 0.0574(16) Uani 1 1 d . . . 
N19 N -0.1601(5) 0.1995(4) 0.3634(3) 0.0605(16) Uani 1 1 d . . . 
N20 N -0.1356(4) 0.0665(4) 0.3432(3) 0.0496(14) Uani 1 1 d . . . 
N21 N 0.0813(4) 0.2492(4) 0.1709(3) 0.0471(13) Uani 1 1 d . . . 
N22 N 0.1171(5) 0.1216(4) 0.1654(3) 0.0574(15) Uani 1 1 d . . . 
N23 N 0.0481(4) -0.0011(3) 0.2829(3) 0.0513(14) Uani 1 1 d . . . 
N24 N 0.2153(4) 0.1146(3) 0.3152(3) 0.0451(13) Uani 1 1 d . . . 
C1 C 0.6299(6) 0.6267(5) 0.2592(4) 0.064(2) Uani 1 1 d . . . 
H1A H 0.5814 0.5642 0.2581 0.076 Uiso 1 1 calc R . . 
C2 C 0.7250(6) 0.6465(5) 0.2659(5) 0.071(2) Uani 1 1 d . . . 
H2A H 0.7419 0.5986 0.2678 0.086 Uiso 1 1 calc R . . 
C3 C 0.7940(5) 0.7380(5) 0.2699(4) 0.068(2) Uani 1 1 d . . . 
H3A H 0.8597 0.7530 0.2761 0.082 Uiso 1 1 calc R . . 
C4 C 0.6774(4) 0.7818(4) 0.2574(3) 0.0407(14) Uani 1 1 d . . . 
C5 C 0.6273(4) 0.9005(4) 0.3202(3) 0.0392(14) Uani 1 1 d . . . 
C6 C 0.6196(6) 0.8803(6) 0.4258(4) 0.065(2) Uani 1 1 d . . . 
H6A H 0.6238 0.8485 0.4614 0.078 Uiso 1 1 calc R . . 
C7 C 0.5989(6) 0.9524(6) 0.4346(4) 0.073(2) Uani 1 1 d . . . 
H7A H 0.5884 0.9698 0.4747 0.088 Uiso 1 1 calc R . . 
C8 C 0.5943(6) 0.9983(5) 0.3807(4) 0.0590(19) Uani 1 1 d . . . 
H8A H 0.5806 1.0482 0.3849 0.071 Uiso 1 1 calc R . . 
C9 C 0.3703(6) 0.7445(6) 0.3728(4) 0.066(2) Uani 1 1 d . . . 
H9A H 0.3801 0.6986 0.3929 0.080 Uiso 1 1 calc R . . 
C10 C 0.3434(7) 0.7984(8) 0.4077(4) 0.087(3) Uani 1 1 d . . . 
H10A H 0.3313 0.7883 0.4501 0.104 Uiso 1 1 calc R . . 
C11 C 0.3351(7) 0.8682(7) 0.3774(4) 0.083(3) Uani 1 1 d . . . 
H11A H 0.3206 0.9085 0.4012 0.100 Uiso 1 1 calc R . . 
N6 N 0.3466(5) 0.8822(5) 0.3153(3) 0.0629(17) Uani 1 1 d . . . 
C12 C 0.3693(4) 0.8228(4) 0.2854(3) 0.0435(15) Uani 1 1 d . . . 
C13 C 0.3536(5) 0.9241(4) 0.1893(3) 0.0455(16) Uani 1 1 d . . . 
C14 C 0.3955(6) 1.0781(5) 0.1951(5) 0.077(3) Uani 1 1 d . . . 
H14A H 0.4418 1.1416 0.2057 0.093 Uiso 1 1 calc R . . 
C15 C 0.3022(6) 1.0558(5) 0.1707(5) 0.083(3) Uani 1 1 d . . . 
H15A H 0.2842 1.1026 0.1651 0.099 Uiso 1 1 calc R . . 
C16 C 0.2360(6) 0.9632(6) 0.1547(4) 0.076(2) Uani 1 1 d . . . 
H16A H 0.1719 0.9466 0.1368 0.091 Uiso 1 1 calc R . . 
C17 C 0.4128(6) 0.5793(6) 0.1114(4) 0.064(2) Uani 1 1 d . . . 
H17A H 0.4798 0.6038 0.1249 0.077 Uiso 1 1 calc R . . 
C18 C 0.3748(7) 0.5352(7) 0.0504(4) 0.077(3) Uani 1 1 d . . . 
H18A H 0.4139 0.5306 0.0219 0.093 Uiso 1 1 calc R . . 
C19 C 0.2756(7) 0.4976(7) 0.0326(4) 0.074(2) Uani 1 1 d . . . 
H19A H 0.2468 0.4657 -0.0089 0.088 Uiso 1 1 calc R . . 
C20 C 0.2647(5) 0.5525(4) 0.1317(3) 0.0416(15) Uani 1 1 d . . . 
C21 C 0.0802(4) 0.5206(4) 0.1376(3) 0.0386(14) Uani 1 1 d . . . 
C22 C -0.0271(5) 0.5467(5) 0.0694(3) 0.0575(19) Uani 1 1 d . . . 
H22A H -0.0449 0.5877 0.0488 0.069 Uiso 1 1 calc R . . 
C23 C -0.0918(5) 0.4498(5) 0.0585(3) 0.0588(19) Uani 1 1 d . . . 
H23A H -0.1507 0.4247 0.0297 0.071 Uiso 1 1 calc R . . 
C24 C -0.0637(5) 0.3936(5) 0.0925(3) 0.0538(18) Uani 1 1 d . . . 
H24A H -0.1057 0.3287 0.0873 0.065 Uiso 1 1 calc R . . 
C25 C 0.3977(4) 0.4884(4) 0.3491(3) 0.0386(14) Uani 1 1 d . . . 
C26 C 0.5027(5) 0.4603(5) 0.4188(3) 0.0530(18) Uani 1 1 d . . . 
H26A H 0.5193 0.4186 0.4394 0.064 Uiso 1 1 calc R . . 
C27 C 0.5658(5) 0.5553(5) 0.4319(4) 0.0578(19) Uani 1 1 d . . . 
H27A H 0.6227 0.5791 0.4626 0.069 Uiso 1 1 calc R . . 
C28 C 0.5414(5) 0.6136(5) 0.3979(4) 0.0559(18) Uani 1 1 d . . . 
H28A H 0.5846 0.6783 0.4042 0.067 Uiso 1 1 calc R . . 
C29 C 0.2122(5) 0.4447(4) 0.3567(3) 0.0462(16) Uani 1 1 d . . . 
C30 C 0.1981(8) 0.4748(8) 0.4591(5) 0.103(3) Uani 1 1 d . . . 
H30A H 0.2260 0.4982 0.5024 0.123 Uiso 1 1 calc R . . 
C31 C 0.0981(8) 0.4405(9) 0.4417(5) 0.104(4) Uani 1 1 d . . . 
H31A H 0.0586 0.4380 0.4722 0.125 Uiso 1 1 calc R . . 
C32 C 0.0606(6) 0.4106(6) 0.3770(4) 0.069(2) Uani 1 1 d . . . 
H32A H -0.0056 0.3898 0.3627 0.083 Uiso 1 1 calc R . . 
C33 C -0.1550(6) 0.3852(5) 0.2282(4) 0.065(2) Uani 1 1 d . . . 
H33A H -0.1070 0.4475 0.2276 0.078 Uiso 1 1 calc R . . 
C34 C -0.2498(6) 0.3658(5) 0.2237(4) 0.071(2) Uani 1 1 d . . . 
H34A H -0.2670 0.4135 0.2206 0.085 Uiso 1 1 calc R . . 
C35 C -0.3181(6) 0.2747(5) 0.2238(5) 0.074(2) Uani 1 1 d . . . 
H35A H -0.3836 0.2599 0.2203 0.089 Uiso 1 1 calc R . . 
C36 C -0.2002(5) 0.2312(4) 0.2347(3) 0.0411(15) Uani 1 1 d . . . 
C37 C -0.1525(4) 0.1372(4) 0.3248(3) 0.0429(15) Uani 1 1 d . . . 
C38 C -0.1262(6) 0.0592(5) 0.4075(4) 0.062(2) Uani 1 1 d . . . 
H38A H -0.1134 0.0122 0.4228 0.074 Uiso 1 1 calc R . . 
C39 C -0.1351(6) 0.1194(7) 0.4511(4) 0.079(3) Uani 1 1 d . . . 
H39A H -0.1301 0.1129 0.4955 0.094 Uiso 1 1 calc R . . 
C40 C -0.1516(6) 0.1902(7) 0.4270(4) 0.076(2) Uani 1 1 d . . . 
H40A H -0.1568 0.2324 0.4558 0.091 Uiso 1 1 calc R . . 
C41 C 0.0868(6) 0.2563(6) 0.1075(4) 0.066(2) Uani 1 1 d . . . 
H41A H 0.0771 0.3026 0.0878 0.080 Uiso 1 1 calc R . . 
C42 C 0.1064(7) 0.1970(7) 0.0712(4) 0.084(3) Uani 1 1 d . . . 
H42A H 0.1105 0.2020 0.0272 0.100 Uiso 1 1 calc R . . 
C43 C 0.1199(7) 0.1295(7) 0.1027(4) 0.078(3) Uani 1 1 d . . . 
H43A H 0.1316 0.0873 0.0785 0.094 Uiso 1 1 calc R . . 
C44 C 0.0973(4) 0.1821(4) 0.1964(3) 0.0420(15) Uani 1 1 d . . . 
C45 C 0.1212(4) 0.0876(4) 0.2941(3) 0.0410(15) Uani 1 1 d . . . 
C46 C 0.0757(6) -0.0681(5) 0.2891(5) 0.081(3) Uani 1 1 d . . . 
H46A H 0.0276 -0.1313 0.2806 0.097 Uiso 1 1 calc R . . 
C47 C 0.1699(6) -0.0478(5) 0.3072(5) 0.084(3) Uani 1 1 d . . . 
H47A H 0.1871 -0.0955 0.3098 0.100 Uiso 1 1 calc R . . 
C48 C 0.2395(5) 0.0458(5) 0.3216(5) 0.072(2) Uani 1 1 d . . . 
H48A H 0.3045 0.0617 0.3359 0.086 Uiso 1 1 calc R . . 
S7 S 0.3289(2) 0.81669(18) 0.00767(12) 0.0923(8) Uani 1 1 d . . . 
O1 O 0.2853(6) 0.8321(7) -0.0530(4) 0.151(4) Uani 1 1 d . . . 
O2 O 0.2618(6) 0.7368(5) 0.0346(3) 0.129(3) Uani 1 1 d . . . 
O3 O 0.3925(5) 0.8972(5) 0.0537(4) 0.117(3) Uani 1 1 d . . . 
F13 F 0.4622(8) 0.7632(7) 0.0229(6) 0.186(4) Uani 1 1 d . . . 
F12 F 0.3583(8) 0.6999(6) -0.0625(4) 0.205(5) Uani 1 1 d . . . 
F11 F 0.4712(7) 0.8442(6) -0.0548(5) 0.175(4) Uani 1 1 d . . . 
C49 C 0.4082(13) 0.7804(10) -0.0238(8) 0.133(5) Uani 1 1 d . . . 
S8' S 0.5248(4) 0.2281(4) 0.4324(2) 0.0454(12) Uani 0.50 1 d P . . 
S8 S 0.5192(5) 0.2007(5) 0.4033(3) 0.0767(19) Uani 0.50 1 d PD . . 
O4 O 0.5203(5) 0.1375(4) 0.4447(3) 0.0879(19) Uani 1 1 d . . . 
O5 O 0.4513(5) 0.2229(6) 0.3867(5) 0.144(3) Uani 1 1 d . . . 
O6 O 0.5431(9) 0.2896(7) 0.4854(4) 0.061(3) Uani 0.50 1 d P . . 
O6' O 0.5157(15) 0.1615(12) 0.3337(7) 0.128(6) Uani 0.50 1 d P . . 
F23 F 0.6360(12) 0.2359(9) 0.3492(6) 0.313(10) Uani 1 1 d D . . 
F22 F 0.7101(5) 0.2949(7) 0.4364(5) 0.186(4) Uani 1 1 d D . . 
F21 F 0.6492(5) 0.3643(4) 0.3789(3) 0.129(2) Uani 1 1 d D . . 
C50 C 0.6341(7) 0.2887(8) 0.4036(6) 0.059(3) Uani 0.60 1 d PD . . 
C50' C 0.6434(18) 0.3422(12) 0.4773(8) 0.068(6) Uani 0.40 1 d P . . 
S9 S -0.1385(2) -0.0980(2) 0.10767(12) 0.0972(8) Uani 1 1 d . . . 
O7 O -0.1451(6) -0.0305(6) 0.1505(3) 0.111(2) Uani 1 1 d . . . 
O8 O -0.1049(7) -0.1561(6) 0.1410(4) 0.137(3) Uani 1 1 d . . . 
O9 O -0.0948(7) -0.0607(6) 0.0534(3) 0.145(3) Uani 1 1 d . . . 
F33 F -0.2659(7) -0.2547(7) 0.0347(4) 0.205(5) Uani 1 1 d . . . 
F32 F -0.3187(6) -0.2162(8) 0.1128(4) 0.222(6) Uani 1 1 d . . . 
F31 F -0.3015(9) -0.1418(11) 0.0321(6) 0.263(8) Uani 1 1 d . . . 
C51 C -0.2647(12) -0.1803(14) 0.0706(6) 0.158(7) Uani 1 1 d . . . 
S10 S 0.03518(19) 0.65145(15) 0.28102(13) 0.0800(7) Uani 1 1 d . . . 
O12 O -0.0588(7) 0.6336(8) 0.2499(5) 0.170(4) Uani 1 1 d . . . 
O11 O 0.1184(8) 0.7372(5) 0.2709(5) 0.164(4) Uani 1 1 d . . . 
O10 O 0.0503(5) 0.5735(4) 0.2713(3) 0.0917(19) Uani 1 1 d . . . 
F43 F 0.0194(14) 0.7364(9) 0.3798(7) 0.320(9) Uani 1 1 d . . . 
F42 F 0.1057(10) 0.6684(11) 0.4031(5) 0.245(7) Uani 1 1 d . . . 
F41 F -0.0417(8) 0.5877(8) 0.3822(5) 0.214(5) Uani 1 1 d . . . 
C52 C 0.0273(15) 0.6596(12) 0.3641(9) 0.151(6) Uani 1 1 d . . . 
S11 S 0.44983(18) 0.36031(14) 0.20869(10) 0.0680(6) Uani 1 1 d . . . 
O15 O 0.5507(6) 0.3863(7) 0.2279(5) 0.163(4) Uani 1 1 d . . . 
O14 O 0.3802(7) 0.2744(4) 0.2269(4) 0.141(4) Uani 1 1 d . . . 
O13 O 0.4303(4) 0.4366(3) 0.2191(3) 0.0732(15) Uani 1 1 d . . . 
F51 F 0.3410(9) 0.3253(9) 0.0974(5) 0.230(6) Uani 1 1 d . . . 
F52 F 0.4421(11) 0.2656(7) 0.1047(4) 0.239(6) Uani 1 1 d . . . 
F53 F 0.4892(9) 0.4108(7) 0.0956(4) 0.195(5) Uani 1 1 d . . . 
C53 C 0.4349(16) 0.3414(11) 0.1222(7) 0.138(6) Uani 1 1 d . . . 
S12 S 0.17410(18) 0.17559(19) 0.46982(11) 0.0791(6) Uani 1 1 d . . . 
F63 F 0.1384(11) 0.2835(8) 0.5419(6) 0.264(8) Uani 1 1 d . . . 
F62 F 0.2052(7) 0.2135(10) 0.5903(4) 0.227(6) Uani 1 1 d . . . 
F61 F 0.0582(5) 0.1423(6) 0.5550(3) 0.149(3) Uani 1 1 d . . . 
O18 O 0.2676(5) 0.2487(5) 0.4681(4) 0.135(3) Uani 1 1 d . . . 
O17 O 0.1016(7) 0.1655(11) 0.4209(4) 0.210(6) Uani 1 1 d . . . 
O16 O 0.1678(9) 0.0858(6) 0.4788(5) 0.170(4) Uani 1 1 d . . . 
C54 C 0.1419(8) 0.2059(10) 0.5402(5) 0.109(4) Uani 1 1 d . . . 
O1W O 0.0341(8) 0.7675(6) 0.0569(6) 0.241(7) Uani 1 1 d . . . 
O2W O -0.4072(5) -0.0009(5) 0.1186(3) 0.099(2) Uani 1 1 d . . . 
O3W O -0.1508(18) 0.6410(18) 0.1226(8) 0.208(12) Uani 0.50 1 d P . . 
O4W O 0.1380(13) 0.9134(13) -0.0019(10) 0.155(7) Uani 0.50 1 d P . . 
O4W' O 0.136(2) 0.862(2) -0.0727(16) 0.252(13) Uiso 0.50 1 d P . . 
 
loop_ 
 _atom_site_aniso_label 
 _atom_site_aniso_U_11 
 _atom_site_aniso_U_22 
 _atom_site_aniso_U_33 
 _atom_site_aniso_U_23 
 _atom_site_aniso_U_13 
 _atom_site_aniso_U_12 
Ag1 0.0422(3) 0.0428(3) 0.0677(4) 0.0063(2) 0.0014(3) 0.0170(2) 
Ag2 0.0569(4) 0.0358(3) 0.1125(5) 0.0158(3) -0.0207(4) 0.0043(3) 
Ag3 0.0486(3) 0.0455(3) 0.0556(3) 0.0067(2) 0.0037(2) 0.0223(3) 
Ag4 0.0477(3) 0.0281(3) 0.0840(4) 0.0036(2) -0.0005(3) 0.0086(2) 
Ag5 0.0409(3) 0.0408(3) 0.0950(5) 0.0193(3) -0.0008(3) 0.0110(3) 
Ag6 0.0380(3) 0.0403(3) 0.0865(4) 0.0030(3) 0.0054(3) 0.0143(2) 
S1 0.0475(10) 0.0457(9) 0.0529(10) 0.0092(8) 0.0091(8) 0.0263(8) 
S2 0.0434(9) 0.0338(8) 0.0550(10) 0.0093(7) 0.0040(8) 0.0201(7) 
S3 0.0297(8) 0.0423(9) 0.0475(9) 0.0029(7) -0.0028(7) 0.0142(7) 
S4 0.0321(8) 0.0437(9) 0.0484(9) 0.0049(7) 0.0015(7) 0.0137(7) 
S5 0.0517(10) 0.0467(10) 0.0606(11) 0.0068(8) 0.0088(9) 0.0302(9) 
S6 0.0445(9) 0.0338(8) 0.0484(9) 0.0079(7) 0.0066(7) 0.0219(7) 
N1 0.036(3) 0.035(3) 0.070(4) -0.001(3) 0.010(3) 0.010(3) 
N2 0.034(3) 0.036(3) 0.075(4) 0.004(3) 0.010(3) 0.014(3) 
N4 0.055(4) 0.047(3) 0.050(3) 0.012(3) 0.008(3) 0.028(3) 
N3 0.040(3) 0.037(3) 0.065(4) 0.005(3) 0.006(3) 0.019(3) 
N5 0.043(3) 0.049(3) 0.050(3) 0.015(3) 0.009(3) 0.025(3) 
N7 0.039(3) 0.034(3) 0.084(4) 0.010(3) 0.000(3) 0.013(3) 
N8 0.037(3) 0.037(3) 0.076(4) 0.014(3) -0.003(3) 0.013(3) 
N9 0.036(3) 0.051(3) 0.052(3) 0.012(3) 0.008(3) 0.021(3) 
N10 0.058(4) 0.071(4) 0.043(3) -0.001(3) -0.002(3) 0.037(3) 
N11 0.039(3) 0.038(3) 0.051(3) 0.014(2) -0.002(3) 0.014(3) 
N12 0.035(3) 0.033(3) 0.060(3) 0.008(2) -0.004(3) 0.011(2) 
N13 0.037(3) 0.024(3) 0.072(4) 0.008(2) 0.002(3) 0.008(2) 
N14 0.038(3) 0.028(3) 0.052(3) 0.007(2) 0.001(3) 0.012(2) 
N15 0.056(4) 0.096(5) 0.051(4) -0.017(3) -0.003(3) 0.037(4) 
N16 0.034(3) 0.049(3) 0.055(3) -0.004(3) 0.003(3) 0.018(3) 
N17 0.038(3) 0.036(3) 0.072(4) 0.006(3) 0.005(3) 0.011(3) 
N18 0.033(3) 0.031(3) 0.099(5) 0.013(3) 0.002(3) 0.010(3) 
N19 0.059(4) 0.057(4) 0.066(4) 0.002(3) 0.003(3) 0.031(3) 
N20 0.033(3) 0.044(3) 0.068(4) 0.011(3) 0.005(3) 0.016(3) 
N21 0.050(3) 0.051(3) 0.050(3) 0.013(3) 0.010(3) 0.031(3) 
N22 0.066(4) 0.066(4) 0.057(4) -0.004(3) 0.006(3) 0.047(4) 
N23 0.033(3) 0.032(3) 0.085(4) 0.004(3) 0.000(3) 0.015(3) 
N24 0.032(3) 0.031(3) 0.071(4) 0.007(2) 0.004(3) 0.015(2) 
C1 0.058(5) 0.030(4) 0.093(6) -0.004(4) 0.016(4) 0.013(4) 
C2 0.055(5) 0.041(4) 0.124(7) 0.003(4) 0.020(5) 0.028(4) 
C3 0.039(4) 0.045(4) 0.122(7) 0.003(4) 0.012(4) 0.022(4) 
C4 0.036(4) 0.033(3) 0.048(4) 0.000(3) 0.008(3) 0.012(3) 
C5 0.028(3) 0.031(3) 0.054(4) 0.001(3) 0.002(3) 0.012(3) 
C6 0.075(6) 0.064(5) 0.055(5) 0.011(4) 0.013(4) 0.031(5) 
C7 0.082(6) 0.075(6) 0.067(5) -0.004(4) 0.019(5) 0.041(5) 
C8 0.062(5) 0.049(4) 0.075(5) -0.003(4) 0.013(4) 0.034(4) 
C9 0.072(5) 0.088(6) 0.063(5) 0.027(4) 0.013(4) 0.056(5) 
C10 0.102(7) 0.150(9) 0.054(5) 0.036(6) 0.022(5) 0.093(7) 
C11 0.092(7) 0.127(8) 0.059(5) -0.002(5) 0.005(5) 0.077(7) 
N6 0.072(4) 0.077(4) 0.058(4) 0.003(3) 0.001(3) 0.053(4) 
C12 0.030(3) 0.042(4) 0.058(4) 0.007(3) 0.003(3) 0.017(3) 
C13 0.038(4) 0.032(3) 0.062(4) 0.012(3) 0.004(3) 0.014(3) 
C14 0.052(5) 0.032(4) 0.137(8) 0.012(4) -0.012(5) 0.017(4) 
C15 0.060(5) 0.040(4) 0.142(8) 0.013(5) -0.011(5) 0.026(4) 
C16 0.047(5) 0.060(5) 0.115(7) 0.009(5) -0.016(5) 0.029(4) 
C17 0.043(4) 0.086(6) 0.067(5) 0.014(4) 0.013(4) 0.033(4) 
C18 0.079(6) 0.121(8) 0.060(5) 0.013(5) 0.018(5) 0.069(6) 
C19 0.086(7) 0.100(7) 0.045(4) -0.002(4) -0.001(4) 0.057(6) 
C20 0.037(4) 0.034(3) 0.052(4) 0.007(3) 0.004(3) 0.016(3) 
C21 0.029(3) 0.034(3) 0.044(3) 0.009(3) 0.004(3) 0.008(3) 
C22 0.046(4) 0.055(4) 0.064(5) 0.019(4) -0.010(4) 0.021(4) 
C23 0.041(4) 0.057(4) 0.062(5) 0.012(4) -0.008(3) 0.014(4) 
C24 0.042(4) 0.037(4) 0.064(4) 0.004(3) -0.001(3) 0.006(3) 
C25 0.032(3) 0.034(3) 0.051(4) 0.008(3) 0.007(3) 0.018(3) 
C26 0.046(4) 0.045(4) 0.067(5) 0.007(3) -0.005(4) 0.025(4) 
C27 0.039(4) 0.050(4) 0.071(5) 0.006(4) -0.012(3) 0.015(3) 
C28 0.039(4) 0.034(3) 0.080(5) 0.003(3) -0.004(4) 0.009(3) 
C29 0.045(4) 0.040(4) 0.052(4) 0.001(3) 0.001(3) 0.020(3) 
C30 0.088(8) 0.151(10) 0.064(6) -0.031(6) -0.008(5) 0.062(7) 
C31 0.080(7) 0.179(11) 0.067(6) -0.020(6) 0.014(5) 0.075(8) 
C32 0.041(4) 0.086(6) 0.078(6) 0.001(5) 0.010(4) 0.029(4) 
C33 0.054(5) 0.031(4) 0.097(6) 0.008(4) 0.011(4) 0.011(4) 
C34 0.055(5) 0.038(4) 0.125(7) 0.015(4) 0.015(5) 0.027(4) 
C35 0.038(4) 0.049(4) 0.134(8) 0.018(5) 0.010(5) 0.022(4) 
C36 0.036(4) 0.031(3) 0.048(4) 0.006(3) 0.003(3) 0.011(3) 
C37 0.026(3) 0.036(3) 0.062(4) 0.009(3) 0.006(3) 0.011(3) 
C38 0.059(5) 0.060(5) 0.063(5) 0.016(4) 0.003(4) 0.026(4) 
C39 0.076(6) 0.106(7) 0.057(5) 0.016(5) 0.017(4) 0.045(6) 
C40 0.074(6) 0.089(6) 0.070(6) -0.006(5) 0.009(5) 0.044(5) 
C41 0.083(6) 0.089(6) 0.050(5) 0.022(4) 0.017(4) 0.057(5) 
C42 0.112(8) 0.131(8) 0.052(5) 0.019(5) 0.022(5) 0.091(7) 
C43 0.099(7) 0.111(7) 0.059(5) 0.002(5) 0.013(5) 0.079(6) 
C44 0.032(3) 0.043(4) 0.052(4) 0.008(3) 0.004(3) 0.020(3) 
C45 0.032(3) 0.033(3) 0.055(4) 0.003(3) -0.001(3) 0.015(3) 
C46 0.044(5) 0.028(4) 0.157(9) 0.010(4) -0.004(5) 0.011(4) 
C47 0.053(5) 0.037(4) 0.160(9) 0.008(5) 0.001(5) 0.026(4) 
C48 0.037(4) 0.041(4) 0.137(8) 0.007(4) -0.006(4) 0.023(4) 
S7 0.0795(17) 0.0771(16) 0.0698(15) 0.0059(12) 0.0114(13) -0.0024(14) 
O1 0.107(7) 0.186(9) 0.121(7) 0.058(6) 0.013(5) 0.037(6) 
O2 0.118(6) 0.096(5) 0.085(5) 0.000(4) 0.035(4) -0.023(4) 
O3 0.103(6) 0.078(4) 0.113(5) -0.020(4) 0.018(4) 0.001(4) 
F13 0.186(9) 0.163(8) 0.226(11) 0.040(7) 0.026(8) 0.098(7) 
F12 0.247(11) 0.127(6) 0.164(8) -0.045(6) 0.073(8) 0.023(7) 
F11 0.171(8) 0.133(6) 0.240(10) 0.067(6) 0.129(8) 0.061(6) 
C49 0.153(14) 0.105(10) 0.117(11) 0.004(9) 0.036(10) 0.041(10) 
S8' 0.057(3) 0.045(3) 0.041(3) 0.0016(19) 0.006(2) 0.031(2) 
S8 0.058(3) 0.067(4) 0.100(6) 0.021(4) -0.007(4) 0.029(3) 
O4 0.137(6) 0.067(4) 0.087(4) 0.024(3) 0.032(4) 0.067(4) 
O5 0.068(5) 0.114(6) 0.243(10) 0.021(6) -0.022(6) 0.050(5) 
O6 0.106(9) 0.061(6) 0.049(6) 0.014(5) 0.023(6) 0.062(7) 
O6' 0.176(17) 0.135(14) 0.064(9) 0.003(9) 0.027(10) 0.066(13) 
F23 0.48(3) 0.296(17) 0.37(2) 0.181(15) 0.33(2) 0.281(19) 
F22 0.083(5) 0.211(9) 0.266(11) 0.039(8) 0.013(6) 0.074(6) 
F21 0.130(6) 0.093(4) 0.158(6) 0.040(4) 0.071(5) 0.035(4) 
C50 0.045(7) 0.068(8) 0.086(9) 0.037(7) 0.021(7) 0.039(7) 
C50' 0.105(17) 0.039(10) 0.036(9) -0.030(8) -0.021(11) 0.025(11) 
S9 0.104(2) 0.114(2) 0.0622(15) -0.0101(14) 0.0178(14) 0.0431(18) 
O7 0.144(7) 0.151(7) 0.066(4) -0.012(4) 0.006(4) 0.097(6) 
O8 0.154(8) 0.112(6) 0.148(7) 0.006(5) 0.009(6) 0.070(6) 
O9 0.170(8) 0.141(7) 0.080(5) -0.002(5) 0.057(5) 0.032(6) 
F33 0.161(8) 0.207(9) 0.127(6) -0.064(7) 0.024(6) -0.001(7) 
F32 0.118(6) 0.300(12) 0.104(6) -0.053(7) 0.040(5) -0.014(7) 
F31 0.186(11) 0.37(2) 0.157(9) 0.056(11) -0.055(8) 0.092(11) 
C51 0.139(13) 0.190(15) 0.063(8) -0.036(9) 0.035(9) 0.013(12) 
S10 0.0836(17) 0.0490(12) 0.1051(18) 0.0050(11) 0.0229(14) 0.0288(12) 
O12 0.146(8) 0.249(12) 0.192(9) 0.081(8) 0.031(7) 0.152(9) 
O11 0.211(10) 0.051(4) 0.170(8) 0.012(5) 0.078(7) 0.005(5) 
O10 0.087(4) 0.066(4) 0.123(5) -0.005(3) 0.034(4) 0.035(3) 
F43 0.59(3) 0.219(11) 0.271(14) 0.021(10) 0.211(17) 0.263(16) 
F42 0.221(13) 0.313(17) 0.121(7) -0.014(8) -0.017(8) 0.079(12) 
F41 0.204(10) 0.230(11) 0.174(9) 0.066(8) 0.121(8) 0.054(9) 
C52 0.165(16) 0.129(12) 0.170(16) -0.029(11) 0.064(14) 0.074(12) 
S11 0.0851(16) 0.0487(11) 0.0692(13) 0.0066(9) 0.0142(11) 0.0311(11) 
O15 0.109(7) 0.182(9) 0.231(11) 0.023(8) -0.015(7) 0.106(7) 
O14 0.224(10) 0.044(3) 0.125(6) 0.020(4) 0.083(6) 0.026(5) 
O13 0.067(4) 0.050(3) 0.094(4) -0.004(3) 0.022(3) 0.020(3) 
F51 0.225(12) 0.259(13) 0.141(8) -0.034(7) -0.073(8) 0.094(11) 
F52 0.50(2) 0.171(8) 0.146(7) 0.026(6) 0.136(10) 0.221(11) 
F53 0.331(14) 0.212(9) 0.155(7) 0.120(7) 0.162(9) 0.185(10) 
C53 0.240(19) 0.110(10) 0.100(9) 0.023(8) 0.067(12) 0.103(12) 
S12 0.0662(15) 0.0973(18) 0.0655(14) 0.0175(12) 0.0138(11) 0.0315(14) 
F63 0.50(2) 0.212(10) 0.268(12) 0.121(9) 0.251(15) 0.273(14) 
F62 0.185(9) 0.419(18) 0.088(5) -0.018(7) -0.005(6) 0.164(11) 
F61 0.104(5) 0.205(8) 0.120(5) 0.035(5) 0.053(4) 0.051(6) 
O18 0.089(5) 0.112(6) 0.136(6) -0.009(5) 0.059(5) -0.014(5) 
O17 0.113(7) 0.46(2) 0.065(5) 0.039(8) 0.005(5) 0.148(10) 
O16 0.259(13) 0.099(6) 0.185(9) 0.042(6) 0.097(9) 0.097(7) 
C54 0.072(7) 0.148(11) 0.082(7) 0.029(7) 0.008(6) 0.034(7) 
O1W 0.172(10) 0.114(7) 0.320(14) 0.080(8) -0.146(10) 0.016(7) 
O2W 0.096(5) 0.101(5) 0.075(4) 0.003(3) 0.012(4) 0.028(4) 
O3W 0.29(3) 0.35(3) 0.106(12) -0.097(15) -0.063(14) 0.28(3) 
O4W 0.115(13) 0.156(15) 0.184(18) 0.094(14) 0.002(12) 0.059(12) 
 
_geom_special_details 
; 
 All esds (except the esd in the dihedral angle between two l.s. planes) 
 are estimated using the full covariance matrix.  The cell esds are taken 
 into account individually in the estimation of esds in distances, angles 
 and torsion angles; correlations between esds in cell parameters are only 
 used when they are defined by crystal symmetry.  An approximate (isotropic) 
 treatment of cell esds is used for estimating esds involving l.s. planes. 
; 
 
loop_ 
 _geom_bond_atom_site_label_1 
 _geom_bond_atom_site_label_2 
 _geom_bond_distance 
 _geom_bond_site_symmetry_2 
 _geom_bond_publ_flag 
Ag1 N9 2.308(5) . ? 
Ag1 N5 2.311(5) . ? 
Ag1 N1 2.444(5) . ? 
Ag1 N13 2.523(5) . ? 
Ag2 N11 2.246(5) . ? 
Ag2 N8 2.250(5) . ? 
Ag3 N21 2.294(5) . ? 
Ag3 N16 2.297(5) . ? 
Ag3 N17 2.480(6) . ? 
Ag3 N12 2.486(5) . ? 
Ag4 N14 2.250(5) . ? 
Ag4 N24 2.258(5) . ? 
Ag4 O5 2.563(7) . ? 
Ag5 N3 2.308(5) 1_445 ? 
Ag5 N18 2.356(5) . ? 
Ag5 N7 2.395(6) 1_445 ? 
Ag5 O2W 2.449(6) . ? 
Ag6 N20 2.314(6) . ? 
Ag6 N23 2.331(5) . ? 
Ag6 N2 2.364(5) 1_445 ? 
Ag6 O7 2.456(6) . ? 
S1 C5 1.756(7) . ? 
S1 C4 1.797(6) . ? 
S2 C12 1.764(7) . ? 
S2 C13 1.798(6) . ? 
S3 C20 1.771(7) . ? 
S3 C21 1.791(6) . ? 
S4 C29 1.773(7) . ? 
S4 C25 1.784(6) . ? 
S5 C37 1.759(7) . ? 
S5 C36 1.791(6) . ? 
S6 C44 1.772(7) . ? 
S6 C45 1.783(6) . ? 
N1 C4 1.326(8) . ? 
N1 C1 1.347(9) . ? 
N2 C4 1.312(8) . ? 
N2 C3 1.342(8) . ? 
N2 Ag6 2.364(5) 1_665 ? 
N4 C5 1.322(8) . ? 
N4 C6 1.335(9) . ? 
N3 C8 1.330(9) . ? 
N3 C5 1.347(7) . ? 
N3 Ag5 2.308(5) 1_665 ? 
N5 C12 1.335(8) . ? 
N5 C9 1.335(9) . ? 
N7 C13 1.321(8) . ? 
N7 C14 1.340(9) . ? 
N7 Ag5 2.395(6) 1_665 ? 
N8 C13 1.330(8) . ? 
N8 C16 1.354(9) . ? 
N9 C20 1.329(8) . ? 
N9 C17 1.350(9) . ? 
N10 C20 1.339(8) . ? 
N10 C19 1.356(10) . ? 
N11 C22 1.334(8) . ? 
N11 C21 1.336(7) . ? 
N12 C21 1.322(7) . ? 
N12 C24 1.344(8) . ? 
N13 C25 1.326(7) . ? 
N13 C28 1.346(8) . ? 
N14 C26 1.334(8) . ? 
N14 C25 1.345(7) . ? 
N15 C30 1.320(11) . ? 
N15 C29 1.321(8) . ? 
N16 C29 1.337(8) . ? 
N16 C32 1.340(9) . ? 
N17 C36 1.324(8) . ? 
N17 C33 1.355(9) . ? 
N18 C36 1.326(8) . ? 
N18 C35 1.345(9) . ? 
N19 C37 1.321(8) . ? 
N19 C40 1.335(10) . ? 
N20 C38 1.343(9) . ? 
N20 C37 1.347(8) . ? 
N21 C44 1.336(8) . ? 
N21 C41 1.338(8) . ? 
N22 C43 1.320(10) . ? 
N22 C44 1.327(8) . ? 
N23 C45 1.331(8) . ? 
N23 C46 1.347(9) . ? 
N24 C45 1.332(8) . ? 
N24 C48 1.339(8) . ? 
C1 C2 1.356(10) . ? 
C1 H1A 0.9300 . ? 
C2 C3 1.346(10) . ? 
C2 H2A 0.9300 . ? 
C3 H3A 0.9300 . ? 
C6 C7 1.360(11) . ? 
C6 H6A 0.9300 . ? 
C7 C8 1.380(11) . ? 
C7 H7A 0.9300 . ? 
C8 H8A 0.9300 . ? 
C9 C10 1.357(11) . ? 
C9 H9A 0.9300 . ? 
C10 C11 1.361(12) . ? 
C10 H10A 0.9300 . ? 
C11 N6 1.340(10) . ? 
C11 H11A 0.9300 . ? 
N6 C12 1.329(8) . ? 
C14 C15 1.353(11) . ? 
C14 H14A 0.9300 . ? 
C15 C16 1.351(10) . ? 
C15 H15A 0.9300 . ? 
C16 H16A 0.9300 . ? 
C17 C18 1.345(11) . ? 
C17 H17A 0.9300 . ? 
C18 C19 1.369(12) . ? 
C18 H18A 0.9300 . ? 
C19 H19A 0.9300 . ? 
C22 C23 1.392(9) . ? 
C22 H22A 0.9300 . ? 
C23 C24 1.366(9) . ? 
C23 H23A 0.9300 . ? 
C24 H24A 0.9300 . ? 
C26 C27 1.367(9) . ? 
C26 H26A 0.9300 . ? 
C27 C28 1.361(9) . ? 
C27 H27A 0.9300 . ? 
C28 H28A 0.9300 . ? 
C30 C31 1.385(13) . ? 
C30 H30A 0.9300 . ? 
C31 C32 1.370(11) . ? 
C31 H31A 0.9300 . ? 
C32 H32A 0.9300 . ? 
C33 C34 1.357(10) . ? 
C33 H33A 0.9300 . ? 
C34 C35 1.348(10) . ? 
C34 H34A 0.9300 . ? 
C35 H35A 0.9300 . ? 
C38 C39 1.373(11) . ? 
C38 H38A 0.9300 . ? 
C39 C40 1.384(12) . ? 
C39 H39A 0.9300 . ? 
C40 H40A 0.9300 . ? 
C41 C42 1.365(11) . ? 
C41 H41A 0.9300 . ? 
C42 C43 1.378(11) . ? 
C42 H42A 0.9300 . ? 
C43 H43A 0.9300 . ? 
C46 C47 1.352(11) . ? 
C46 H46A 0.9300 . ? 
C47 C48 1.372(10) . ? 
C47 H47A 0.9300 . ? 
C48 H48A 0.9300 . ? 
S7 O2 1.415(7) . ? 
S7 O3 1.428(7) . ? 
S7 O1 1.446(8) . ? 
S7 C49 1.785(16) . ? 
F13 C49 1.332(16) . ? 
F12 C49 1.322(15) . ? 
F11 C49 1.304(15) . ? 
S8' S8 0.707(6) . ? 
S8' O6 1.361(10) . ? 
S8' O5 1.367(9) . ? 
S8' O4 1.465(8) . ? 
S8' C50 1.723(13) . ? 
S8' C50' 1.978(19) . ? 
S8 O5 1.288(9) . ? 
S8 O4 1.366(8) . ? 
S8 O6' 1.543(15) . ? 
S8 C50 1.684(11) . ? 
S8 O6 2.065(11) . ? 
S8 F23 2.127(13) . ? 
O6 C50' 1.43(2) . ? 
O6' F23 1.67(2) . ? 
F23 C50 1.402(13) . ? 
F22 C50 1.255(11) . ? 
F22 C50' 1.83(2) . ? 
F21 C50 1.271(10) . ? 
C50 C50' 1.69(2) . ? 
S9 O9 1.403(7) . ? 
S9 O7 1.433(7) . ? 
S9 O8 1.436(9) . ? 
S9 C51 1.823(15) . ? 
F33 C51 1.38(2) . ? 
F32 C51 1.261(14) . ? 
F31 C51 1.27(2) . ? 
S10 O10 1.398(6) . ? 
S10 O12 1.422(9) . ? 
S10 O11 1.429(8) . ? 
S10 C52 1.754(17) . ? 
F43 C52 1.335(16) . ? 
F42 C52 1.33(2) . ? 
F41 C52 1.268(18) . ? 
S11 O14 1.404(7) . ? 
S11 O13 1.418(5) . ? 
S11 O15 1.429(8) . ? 
S11 C53 1.781(13) . ? 
F51 C53 1.39(2) . ? 
F52 C53 1.323(13) . ? 
F53 C53 1.245(16) . ? 
S12 O17 1.370(8) . ? 
S12 O18 1.387(7) . ? 
S12 O16 1.426(8) . ? 
S12 C54 1.735(13) . ? 
F63 C54 1.279(14) . ? 
F62 C54 1.304(12) . ? 
F61 C54 1.311(12) . ? 
O4W O4W' 1.65(3) . ? 
 
loop_ 
 _geom_angle_atom_site_label_1 
 _geom_angle_atom_site_label_2 
 _geom_angle_atom_site_label_3 
 _geom_angle 
 _geom_angle_site_symmetry_1 
 _geom_angle_site_symmetry_3 
 _geom_angle_publ_flag 
N9 Ag1 N5 119.54(19) . . ? 
N9 Ag1 N1 100.59(19) . . ? 
N5 Ag1 N1 128.76(18) . . ? 
N9 Ag1 N13 126.08(18) . . ? 
N5 Ag1 N13 96.70(18) . . ? 
N1 Ag1 N13 81.95(18) . . ? 
N11 Ag2 N8 173.9(2) . . ? 
N21 Ag3 N16 121.43(19) . . ? 
N21 Ag3 N17 125.58(19) . . ? 
N16 Ag3 N17 100.82(19) . . ? 
N21 Ag3 N12 94.54(18) . . ? 
N16 Ag3 N12 128.76(18) . . ? 
N17 Ag3 N12 81.90(18) . . ? 
N14 Ag4 N24 176.62(19) . . ? 
N14 Ag4 O5 94.7(2) . . ? 
N24 Ag4 O5 88.0(2) . . ? 
N3 Ag5 N18 117.9(2) 1_445 . ? 
N3 Ag5 N7 110.29(19) 1_445 1_445 ? 
N18 Ag5 N7 112.85(18) . 1_445 ? 
N3 Ag5 O2W 128.0(2) 1_445 . ? 
N18 Ag5 O2W 93.4(2) . . ? 
N7 Ag5 O2W 91.2(2) 1_445 . ? 
N20 Ag6 N23 112.18(19) . . ? 
N20 Ag6 N2 113.31(19) . 1_445 ? 
N23 Ag6 N2 112.89(18) . 1_445 ? 
N20 Ag6 O7 123.8(2) . . ? 
N23 Ag6 O7 100.0(2) . . ? 
N2 Ag6 O7 93.0(2) 1_445 . ? 
C5 S1 C4 100.8(3) . . ? 
C12 S2 C13 98.1(3) . . ? 
C20 S3 C21 99.1(3) . . ? 
C29 S4 C25 97.8(3) . . ? 
C37 S5 C36 99.2(3) . . ? 
C44 S6 C45 97.9(3) . . ? 
C4 N1 C1 114.7(6) . . ? 
C4 N1 Ag1 122.3(4) . . ? 
C1 N1 Ag1 122.0(4) . . ? 
C4 N2 C3 115.4(6) . . ? 
C4 N2 Ag6 119.5(4) . 1_665 ? 
C3 N2 Ag6 125.1(5) . 1_665 ? 
C5 N4 C6 115.1(6) . . ? 
C8 N3 C5 115.6(6) . . ? 
C8 N3 Ag5 121.9(4) . 1_665 ? 
C5 N3 Ag5 122.2(4) . 1_665 ? 
C12 N5 C9 115.3(6) . . ? 
C12 N5 Ag1 125.3(4) . . ? 
C9 N5 Ag1 119.2(4) . . ? 
C13 N7 C14 114.9(6) . . ? 
C13 N7 Ag5 119.2(4) . 1_665 ? 
C14 N7 Ag5 125.4(5) . 1_665 ? 
C13 N8 C16 115.0(6) . . ? 
C13 N8 Ag2 118.9(4) . . ? 
C16 N8 Ag2 125.7(5) . . ? 
C20 N9 C17 114.4(6) . . ? 
C20 N9 Ag1 125.6(4) . . ? 
C17 N9 Ag1 119.9(5) . . ? 
C20 N10 C19 114.9(6) . . ? 
C22 N11 C21 116.2(5) . . ? 
C22 N11 Ag2 123.3(4) . . ? 
C21 N11 Ag2 120.3(4) . . ? 
C21 N12 C24 116.0(5) . . ? 
C21 N12 Ag3 117.1(4) . . ? 
C24 N12 Ag3 121.6(4) . . ? 
C25 N13 C28 116.3(5) . . ? 
C25 N13 Ag1 114.5(4) . . ? 
C28 N13 Ag1 124.2(4) . . ? 
C26 N14 C25 116.4(5) . . ? 
C26 N14 Ag4 123.7(4) . . ? 
C25 N14 Ag4 119.5(4) . . ? 
C30 N15 C29 115.2(7) . . ? 
C29 N16 C32 116.1(6) . . ? 
C29 N16 Ag3 126.0(4) . . ? 
C32 N16 Ag3 117.9(5) . . ? 
C36 N17 C33 114.5(6) . . ? 
C36 N17 Ag3 121.4(4) . . ? 
C33 N17 Ag3 123.8(4) . . ? 
C36 N18 C35 115.5(6) . . ? 
C36 N18 Ag5 120.0(4) . . ? 
C35 N18 Ag5 124.5(5) . . ? 
C37 N19 C40 116.4(7) . . ? 
C38 N20 C37 115.9(6) . . ? 
C38 N20 Ag6 122.2(5) . . ? 
C37 N20 Ag6 121.8(5) . . ? 
C44 N21 C41 116.4(6) . . ? 
C44 N21 Ag3 123.8(4) . . ? 
C41 N21 Ag3 119.8(4) . . ? 
C43 N22 C44 115.1(6) . . ? 
C45 N23 C46 114.9(6) . . ? 
C45 N23 Ag6 119.6(4) . . ? 
C46 N23 Ag6 124.9(4) . . ? 
C45 N24 C48 116.8(5) . . ? 
C45 N24 Ag4 119.0(4) . . ? 
C48 N24 Ag4 124.0(4) . . ? 
N1 C1 C2 122.2(7) . . ? 
N1 C1 H1A 118.9 . . ? 
C2 C1 H1A 118.9 . . ? 
C3 C2 C1 117.7(7) . . ? 
C3 C2 H2A 121.2 . . ? 
C1 C2 H2A 121.2 . . ? 
N2 C3 C2 122.3(7) . . ? 
N2 C3 H3A 118.8 . . ? 
C2 C3 H3A 118.8 . . ? 
N2 C4 N1 127.5(6) . . ? 
N2 C4 S1 116.2(4) . . ? 
N1 C4 S1 116.0(5) . . ? 
N4 C5 N3 126.8(6) . . ? 
N4 C5 S1 120.7(5) . . ? 
N3 C5 S1 112.4(5) . . ? 
N4 C6 C7 123.7(7) . . ? 
N4 C6 H6A 118.1 . . ? 
C7 C6 H6A 118.1 . . ? 
C6 C7 C8 116.4(7) . . ? 
C6 C7 H7A 121.8 . . ? 
C8 C7 H7A 121.8 . . ? 
N3 C8 C7 122.3(7) . . ? 
N3 C8 H8A 118.8 . . ? 
C7 C8 H8A 118.8 . . ? 
N5 C9 C10 122.8(7) . . ? 
N5 C9 H9A 118.6 . . ? 
C10 C9 H9A 118.6 . . ? 
C9 C10 C11 116.5(8) . . ? 
C9 C10 H10A 121.8 . . ? 
C11 C10 H10A 121.8 . . ? 
N6 C11 C10 123.9(8) . . ? 
N6 C11 H11A 118.0 . . ? 
C10 C11 H11A 118.0 . . ? 
C12 N6 C11 114.0(7) . . ? 
N6 C12 N5 127.3(6) . . ? 
N6 C12 S2 119.0(5) . . ? 
N5 C12 S2 113.7(5) . . ? 
N7 C13 N8 127.5(6) . . ? 
N7 C13 S2 117.1(5) . . ? 
N8 C13 S2 115.5(5) . . ? 
N7 C14 C15 122.9(7) . . ? 
N7 C14 H14A 118.5 . . ? 
C15 C14 H14A 118.5 . . ? 
C16 C15 C14 117.8(7) . . ? 
C16 C15 H15A 121.1 . . ? 
C14 C15 H15A 121.1 . . ? 
C15 C16 N8 121.9(7) . . ? 
C15 C16 H16A 119.0 . . ? 
N8 C16 H16A 119.0 . . ? 
C18 C17 N9 124.3(7) . . ? 
C18 C17 H17A 117.8 . . ? 
N9 C17 H17A 117.8 . . ? 
C17 C18 C19 116.4(8) . . ? 
C17 C18 H18A 121.8 . . ? 
C19 C18 H18A 121.8 . . ? 
N10 C19 C18 122.8(7) . . ? 
N10 C19 H19A 118.6 . . ? 
C18 C19 H19A 118.6 . . ? 
N9 C20 N10 127.2(6) . . ? 
N9 C20 S3 113.5(5) . . ? 
N10 C20 S3 119.3(5) . . ? 
N12 C21 N11 126.3(5) . . ? 
N12 C21 S3 117.3(4) . . ? 
N11 C21 S3 116.4(4) . . ? 
N11 C22 C23 122.2(6) . . ? 
N11 C22 H22A 118.9 . . ? 
C23 C22 H22A 118.9 . . ? 
C24 C23 C22 116.1(6) . . ? 
C24 C23 H23A 121.9 . . ? 
C22 C23 H23A 121.9 . . ? 
N12 C24 C23 123.0(6) . . ? 
N12 C24 H24A 118.5 . . ? 
C23 C24 H24A 118.5 . . ? 
N13 C25 N14 125.1(6) . . ? 
N13 C25 S4 118.1(4) . . ? 
N14 C25 S4 116.7(4) . . ? 
N14 C26 C27 122.5(6) . . ? 
N14 C26 H26A 118.7 . . ? 
C27 C26 H26A 118.7 . . ? 
C28 C27 C26 116.8(6) . . ? 
C28 C27 H27A 121.6 . . ? 
C26 C27 H27A 121.6 . . ? 
N13 C28 C27 122.6(6) . . ? 
N13 C28 H28A 118.7 . . ? 
C27 C28 H28A 118.7 . . ? 
N15 C29 N16 126.9(7) . . ? 
N15 C29 S4 119.2(5) . . ? 
N16 C29 S4 113.8(5) . . ? 
N15 C30 C31 123.7(8) . . ? 
N15 C30 H30A 118.2 . . ? 
C31 C30 H30A 118.2 . . ? 
C32 C31 C30 116.2(8) . . ? 
C32 C31 H31A 121.9 . . ? 
C30 C31 H31A 121.9 . . ? 
N16 C32 C31 121.8(7) . . ? 
N16 C32 H32A 119.1 . . ? 
C31 C32 H32A 119.1 . . ? 
N17 C33 C34 122.9(6) . . ? 
N17 C33 H33A 118.6 . . ? 
C34 C33 H33A 118.6 . . ? 
C35 C34 C33 117.4(7) . . ? 
C35 C34 H34A 121.3 . . ? 
C33 C34 H34A 121.3 . . ? 
N18 C35 C34 122.4(7) . . ? 
N18 C35 H35A 118.8 . . ? 
C34 C35 H35A 118.8 . . ? 
N17 C36 N18 127.3(6) . . ? 
N17 C36 S5 115.6(5) . . ? 
N18 C36 S5 117.0(4) . . ? 
N19 C37 N20 126.7(6) . . ? 
N19 C37 S5 120.6(5) . . ? 
N20 C37 S5 112.7(5) . . ? 
N20 C38 C39 121.6(7) . . ? 
N20 C38 H38A 119.2 . . ? 
C39 C38 H38A 119.2 . . ? 
C38 C39 C40 117.7(8) . . ? 
C38 C39 H39A 121.1 . . ? 
C40 C39 H39A 121.1 . . ? 
N19 C40 C39 121.7(8) . . ? 
N19 C40 H40A 119.2 . . ? 
C39 C40 H40A 119.2 . . ? 
N21 C41 C42 121.3(7) . . ? 
N21 C41 H41A 119.3 . . ? 
C42 C41 H41A 119.3 . . ? 
C41 C42 C43 117.1(8) . . ? 
C41 C42 H42A 121.5 . . ? 
C43 C42 H42A 121.5 . . ? 
N22 C43 C42 123.3(7) . . ? 
N22 C43 H43A 118.3 . . ? 
C42 C43 H43A 118.3 . . ? 
N22 C44 N21 126.8(6) . . ? 
N22 C44 S6 120.1(5) . . ? 
N21 C44 S6 113.1(5) . . ? 
N23 C45 N24 126.2(5) . . ? 
N23 C45 S6 117.0(4) . . ? 
N24 C45 S6 116.7(4) . . ? 
N23 C46 C47 123.1(7) . . ? 
N23 C46 H46A 118.5 . . ? 
C47 C46 H46A 118.5 . . ? 
C46 C47 C48 117.7(7) . . ? 
C46 C47 H47A 121.2 . . ? 
C48 C47 H47A 121.2 . . ? 
N24 C48 C47 121.1(7) . . ? 
N24 C48 H48A 119.5 . . ? 
C47 C48 H48A 119.5 . . ? 
O2 S7 O3 115.1(4) . . ? 
O2 S7 O1 112.6(5) . . ? 
O3 S7 O1 118.1(6) . . ? 
O2 S7 C49 104.9(6) . . ? 
O3 S7 C49 104.8(6) . . ? 
O1 S7 C49 98.6(7) . . ? 
F11 C49 F12 109.2(12) . . ? 
F11 C49 F13 105.2(14) . . ? 
F12 C49 F13 104.6(14) . . ? 
F11 C49 S7 113.0(11) . . ? 
F12 C49 S7 111.8(12) . . ? 
F13 C49 S7 112.5(11) . . ? 
S8 S8' O6 173.4(13) . . ? 
S8 S8' O5 68.5(9) . . ? 
O6 S8' O5 111.3(7) . . ? 
S8 S8' O4 67.9(9) . . ? 
O6 S8' O4 117.0(6) . . ? 
O5 S8' O4 115.6(6) . . ? 
S8 S8' C50 75.0(10) . . ? 
O6 S8' C50 99.2(7) . . ? 
O5 S8' C50 108.3(6) . . ? 
O4 S8' C50 103.4(5) . . ? 
S8 S8' C50' 128.4(13) . . ? 
O6 S8' C50' 46.2(7) . . ? 
O5 S8' C50' 128.5(7) . . ? 
O4 S8' C50' 115.6(7) . . ? 
C50 S8' C50' 53.7(8) . . ? 
S8' S8 O5 80.8(10) . . ? 
S8' S8 O4 83.4(10) . . ? 
O5 S8 O4 129.0(8) . . ? 
S8' S8 O6' 167.7(13) . . ? 
O5 S8 O6' 94.8(9) . . ? 
O4 S8 O6' 108.0(8) . . ? 
S8' S8 C50 81.1(10) . . ? 
O5 S8 C50 114.7(7) . . ? 
O4 S8 C50 110.1(6) . . ? 
O6' S8 C50 90.5(9) . . ? 
S8' S8 O6 4.3(9) . . ? 
O5 S8 O6 80.8(6) . . ? 
O4 S8 O6 86.7(5) . . ? 
O6' S8 O6 163.6(8) . . ? 
C50 S8 O6 77.2(6) . . ? 
S8' S8 F23 122.0(11) . . ? 
O5 S8 F23 121.6(7) . . ? 
O4 S8 F23 107.9(6) . . ? 
O6' S8 F23 51.0(8) . . ? 
C50 S8 F23 41.2(5) . . ? 
O6 S8 F23 118.3(6) . . ? 
S8 O4 S8' 28.7(3) . . ? 
S8 O5 S8' 30.7(3) . . ? 
S8 O5 Ag4 175.7(8) . . ? 
S8' O5 Ag4 152.2(6) . . ? 
S8' O6 C50' 90.3(9) . . ? 
S8' O6 S8 2.2(4) . . ? 
C50' O6 S8 88.5(8) . . ? 
S8 O6' F23 82.9(9) . . ? 
C50 F23 O6' 96.4(9) . . ? 
C50 F23 S8 52.2(6) . . ? 
O6' F23 S8 46.0(6) . . ? 
C50 F22 C50' 63.2(9) . . ? 
F22 C50 F21 112.8(10) . . ? 
F22 C50 F23 94.8(9) . . ? 
F21 C50 F23 99.7(9) . . ? 
F22 C50 S8 125.2(9) . . ? 
F21 C50 S8 120.9(8) . . ? 
F23 C50 S8 86.6(9) . . ? 
F22 C50 C50' 75.2(11) . . ? 
F21 C50 C50' 89.3(10) . . ? 
F23 C50 C50' 168.7(12) . . ? 
S8 C50 C50' 94.7(10) . . ? 
F22 C50 S8' 118.2(9) . . ? 
F21 C50 S8' 116.7(8) . . ? 
F23 C50 S8' 110.4(9) . . ? 
S8 C50 S8' 23.9(3) . . ? 
C50' C50 S8' 70.9(9) . . ? 
O6 C50' C50 98.2(11) . . ? 
O6 C50' F22 125.3(11) . . ? 
C50 C50' F22 41.6(6) . . ? 
O6 C50' S8' 43.5(6) . . ? 
C50 C50' S8' 55.4(6) . . ? 
F22 C50' S8' 84.7(7) . . ? 
O9 S9 O7 113.8(5) . . ? 
O9 S9 O8 115.7(6) . . ? 
O7 S9 O8 113.7(5) . . ? 
O9 S9 C51 102.3(6) . . ? 
O7 S9 C51 105.2(7) . . ? 
O8 S9 C51 104.4(8) . . ? 
S9 O7 Ag6 120.5(4) . . ? 
F32 C51 F31 109.7(19) . . ? 
F32 C51 F33 106.2(16) . . ? 
F31 C51 F33 107.8(12) . . ? 
F32 C51 S9 111.9(9) . . ? 
F31 C51 S9 112.3(14) . . ? 
F33 C51 S9 108.8(13) . . ? 
O10 S10 O12 112.3(6) . . ? 
O10 S10 O11 111.3(5) . . ? 
O12 S10 O11 117.8(6) . . ? 
O10 S10 C52 104.3(6) . . ? 
O12 S10 C52 103.1(8) . . ? 
O11 S10 C52 106.7(7) . . ? 
F41 C52 F42 102.2(18) . . ? 
F41 C52 F43 109.6(15) . . ? 
F42 C52 F43 106.5(17) . . ? 
F41 C52 S10 115.2(13) . . ? 
F42 C52 S10 113.5(12) . . ? 
F43 C52 S10 109.3(14) . . ? 
O14 S11 O13 114.2(5) . . ? 
O14 S11 O15 116.9(6) . . ? 
O13 S11 O15 113.1(5) . . ? 
O14 S11 C53 104.9(7) . . ? 
O13 S11 C53 103.2(5) . . ? 
O15 S11 C53 102.2(8) . . ? 
F53 C53 F52 111.4(13) . . ? 
F53 C53 F51 103.6(13) . . ? 
F52 C53 F51 108.6(16) . . ? 
F53 C53 S11 115.4(12) . . ? 
F52 C53 S11 110.1(10) . . ? 
F51 C53 S11 107.3(11) . . ? 
O17 S12 O18 116.5(7) . . ? 
O17 S12 O16 110.0(8) . . ? 
O18 S12 O16 115.3(6) . . ? 
O17 S12 C54 104.6(6) . . ? 
O18 S12 C54 104.7(5) . . ? 
O16 S12 C54 104.1(6) . . ? 
F63 C54 F62 107.3(13) . . ? 
F63 C54 F61 105.8(12) . . ? 
F62 C54 F61 102.8(10) . . ? 
F63 C54 S12 115.2(9) . . ? 
F62 C54 S12 109.1(10) . . ? 
F61 C54 S12 115.6(10) . . ? 
 
loop_ 
 _geom_torsion_atom_site_label_1 
 _geom_torsion_atom_site_label_2 
 _geom_torsion_atom_site_label_3 
 _geom_torsion_atom_site_label_4 
 _geom_torsion 
 _geom_torsion_site_symmetry_1 
 _geom_torsion_site_symmetry_2 
 _geom_torsion_site_symmetry_3 
 _geom_torsion_site_symmetry_4 
 _geom_torsion_publ_flag 
N9 Ag1 N1 C4 113.0(5) . . . . ? 
N5 Ag1 N1 C4 -29.5(6) . . . . ? 
N13 Ag1 N1 C4 -121.6(5) . . . . ? 
N9 Ag1 N1 C1 -78.7(6) . . . . ? 
N5 Ag1 N1 C1 138.8(5) . . . . ? 
N13 Ag1 N1 C1 46.7(6) . . . . ? 
N9 Ag1 N5 C12 -49.2(6) . . . . ? 
N1 Ag1 N5 C12 87.3(5) . . . . ? 
N13 Ag1 N5 C12 172.4(5) . . . . ? 
N9 Ag1 N5 C9 134.8(5) . . . . ? 
N1 Ag1 N5 C9 -88.6(6) . . . . ? 
N13 Ag1 N5 C9 -3.6(6) . . . . ? 
N11 Ag2 N8 C13 97.5(18) . . . . ? 
N11 Ag2 N8 C16 -89.8(19) . . . . ? 
N5 Ag1 N9 C20 -37.6(5) . . . . ? 
N1 Ag1 N9 C20 175.5(5) . . . . ? 
N13 Ag1 N9 C20 87.8(5) . . . . ? 
N5 Ag1 N9 C17 145.9(5) . . . . ? 
N1 Ag1 N9 C17 -1.0(5) . . . . ? 
N13 Ag1 N9 C17 -88.7(5) . . . . ? 
N8 Ag2 N11 C22 102.6(18) . . . . ? 
N8 Ag2 N11 C21 -72.8(19) . . . . ? 
N21 Ag3 N12 C21 -119.7(5) . . . . ? 
N16 Ag3 N12 C21 17.6(6) . . . . ? 
N17 Ag3 N12 C21 115.0(5) . . . . ? 
N21 Ag3 N12 C24 87.2(5) . . . . ? 
N16 Ag3 N12 C24 -135.5(5) . . . . ? 
N17 Ag3 N12 C24 -38.1(5) . . . . ? 
N9 Ag1 N13 C25 -18.9(5) . . . . ? 
N5 Ag1 N13 C25 115.5(4) . . . . ? 
N1 Ag1 N13 C25 -116.2(5) . . . . ? 
N9 Ag1 N13 C28 134.9(5) . . . . ? 
N5 Ag1 N13 C28 -90.7(5) . . . . ? 
N1 Ag1 N13 C28 37.7(5) . . . . ? 
N24 Ag4 N14 C26 131(3) . . . . ? 
O5 Ag4 N14 C26 -14.7(6) . . . . ? 
N24 Ag4 N14 C25 -57(3) . . . . ? 
O5 Ag4 N14 C25 157.7(5) . . . . ? 
N21 Ag3 N16 C29 40.2(6) . . . . ? 
N17 Ag3 N16 C29 -175.6(5) . . . . ? 
N12 Ag3 N16 C29 -87.3(5) . . . . ? 
N21 Ag3 N16 C32 -136.9(5) . . . . ? 
N17 Ag3 N16 C32 7.3(6) . . . . ? 
N12 Ag3 N16 C32 95.5(6) . . . . ? 
N21 Ag3 N17 C36 36.6(6) . . . . ? 
N16 Ag3 N17 C36 -105.5(5) . . . . ? 
N12 Ag3 N17 C36 126.4(5) . . . . ? 
N21 Ag3 N17 C33 -135.6(6) . . . . ? 
N16 Ag3 N17 C33 82.3(6) . . . . ? 
N12 Ag3 N17 C33 -45.8(6) . . . . ? 
N3 Ag5 N18 C36 57.8(6) 1_445 . . . ? 
N7 Ag5 N18 C36 -171.7(5) 1_445 . . . ? 
O2W Ag5 N18 C36 -78.9(6) . . . . ? 
N3 Ag5 N18 C35 -119.5(7) 1_445 . . . ? 
N7 Ag5 N18 C35 10.9(7) 1_445 . . . ? 
O2W Ag5 N18 C35 103.7(7) . . . . ? 
N23 Ag6 N20 C38 -66.3(6) . . . . ? 
N2 Ag6 N20 C38 63.0(6) 1_445 . . . ? 
O7 Ag6 N20 C38 173.9(5) . . . . ? 
N23 Ag6 N20 C37 109.4(5) . . . . ? 
N2 Ag6 N20 C37 -121.3(5) 1_445 . . . ? 
O7 Ag6 N20 C37 -10.4(6) . . . . ? 
N16 Ag3 N21 C44 41.2(6) . . . . ? 
N17 Ag3 N21 C44 -93.8(5) . . . . ? 
N12 Ag3 N21 C44 -177.1(5) . . . . ? 
N16 Ag3 N21 C41 -140.7(5) . . . . ? 
N17 Ag3 N21 C41 84.3(6) . . . . ? 
N12 Ag3 N21 C41 1.0(6) . . . . ? 
N20 Ag6 N23 C45 -42.2(6) . . . . ? 
N2 Ag6 N23 C45 -171.7(5) 1_445 . . . ? 
O7 Ag6 N23 C45 90.8(5) . . . . ? 
N20 Ag6 N23 C46 128.5(7) . . . . ? 
N2 Ag6 N23 C46 -1.0(7) 1_445 . . . ? 
O7 Ag6 N23 C46 -98.6(7) . . . . ? 
N14 Ag4 N24 C45 27(3) . . . . ? 
O5 Ag4 N24 C45 172.5(5) . . . . ? 
N14 Ag4 N24 C48 -148(3) . . . . ? 
O5 Ag4 N24 C48 -2.1(7) . . . . ? 
C4 N1 C1 C2 -1.4(11) . . . . ? 
Ag1 N1 C1 C2 -170.5(7) . . . . ? 
N1 C1 C2 C3 2.5(14) . . . . ? 
C4 N2 C3 C2 0.8(12) . . . . ? 
Ag6 N2 C3 C2 -178.6(7) 1_665 . . . ? 
C1 C2 C3 N2 -2.2(14) . . . . ? 
C3 N2 C4 N1 0.4(11) . . . . ? 
Ag6 N2 C4 N1 179.9(5) 1_665 . . . ? 
C3 N2 C4 S1 -173.5(6) . . . . ? 
Ag6 N2 C4 S1 6.0(7) 1_665 . . . ? 
C1 N1 C4 N2 -0.1(10) . . . . ? 
Ag1 N1 C4 N2 168.9(5) . . . . ? 
C1 N1 C4 S1 173.8(5) . . . . ? 
Ag1 N1 C4 S1 -17.2(7) . . . . ? 
C5 S1 C4 N2 -99.5(5) . . . . ? 
C5 S1 C4 N1 85.9(5) . . . . ? 
C6 N4 C5 N3 1.2(10) . . . . ? 
C6 N4 C5 S1 -180.0(5) . . . . ? 
C8 N3 C5 N4 -1.5(9) . . . . ? 
Ag5 N3 C5 N4 -176.6(5) 1_665 . . . ? 
C8 N3 C5 S1 179.6(5) . . . . ? 
Ag5 N3 C5 S1 4.5(6) 1_665 . . . ? 
C4 S1 C5 N4 -3.7(6) . . . . ? 
C4 S1 C5 N3 175.3(4) . . . . ? 
C5 N4 C6 C7 -0.1(11) . . . . ? 
N4 C6 C7 C8 -0.6(13) . . . . ? 
C5 N3 C8 C7 0.6(10) . . . . ? 
Ag5 N3 C8 C7 175.8(6) 1_665 . . . ? 
C6 C7 C8 N3 0.3(12) . . . . ? 
C12 N5 C9 C10 1.0(11) . . . . ? 
Ag1 N5 C9 C10 177.3(7) . . . . ? 
N5 C9 C10 C11 -3.5(14) . . . . ? 
C9 C10 C11 N6 3.8(15) . . . . ? 
C10 C11 N6 C12 -1.5(13) . . . . ? 
C11 N6 C12 N5 -1.4(11) . . . . ? 
C11 N6 C12 S2 179.9(6) . . . . ? 
C9 N5 C12 N6 1.7(10) . . . . ? 
Ag1 N5 C12 N6 -174.4(5) . . . . ? 
C9 N5 C12 S2 -179.6(5) . . . . ? 
Ag1 N5 C12 S2 4.4(7) . . . . ? 
C13 S2 C12 N6 -4.5(6) . . . . ? 
C13 S2 C12 N5 176.6(5) . . . . ? 
C14 N7 C13 N8 2.2(11) . . . . ? 
Ag5 N7 C13 N8 -169.4(6) 1_665 . . . ? 
C14 N7 C13 S2 -178.2(6) . . . . ? 
Ag5 N7 C13 S2 10.3(7) 1_665 . . . ? 
C16 N8 C13 N7 -1.4(11) . . . . ? 
Ag2 N8 C13 N7 172.1(6) . . . . ? 
C16 N8 C13 S2 178.9(6) . . . . ? 
Ag2 N8 C13 S2 -7.6(7) . . . . ? 
C12 S2 C13 N7 86.7(6) . . . . ? 
C12 S2 C13 N8 -93.6(6) . . . . ? 
C13 N7 C14 C15 -1.0(13) . . . . ? 
Ag5 N7 C14 C15 170.0(7) 1_665 . . . ? 
N7 C14 C15 C16 -0.8(15) . . . . ? 
C14 C15 C16 N8 1.7(15) . . . . ? 
C13 N8 C16 C15 -0.7(13) . . . . ? 
Ag2 N8 C16 C15 -173.6(7) . . . . ? 
C20 N9 C17 C18 0.7(11) . . . . ? 
Ag1 N9 C17 C18 177.5(7) . . . . ? 
N9 C17 C18 C19 -1.8(13) . . . . ? 
C20 N10 C19 C18 0.6(12) . . . . ? 
C17 C18 C19 N10 1.0(14) . . . . ? 
C17 N9 C20 N10 1.3(9) . . . . ? 
Ag1 N9 C20 N10 -175.3(5) . . . . ? 
C17 N9 C20 S3 -179.7(5) . . . . ? 
Ag1 N9 C20 S3 3.7(6) . . . . ? 
C19 N10 C20 N9 -2.0(10) . . . . ? 
C19 N10 C20 S3 179.1(5) . . . . ? 
C21 S3 C20 N9 174.2(4) . . . . ? 
C21 S3 C20 N10 -6.7(6) . . . . ? 
C24 N12 C21 N11 3.9(10) . . . . ? 
Ag3 N12 C21 N11 -150.7(5) . . . . ? 
C24 N12 C21 S3 -177.4(5) . . . . ? 
Ag3 N12 C21 S3 28.1(6) . . . . ? 
C22 N11 C21 N12 -2.4(10) . . . . ? 
Ag2 N11 C21 N12 173.3(5) . . . . ? 
C22 N11 C21 S3 178.8(5) . . . . ? 
Ag2 N11 C21 S3 -5.5(7) . . . . ? 
C20 S3 C21 N12 86.0(5) . . . . ? 
C20 S3 C21 N11 -95.1(5) . . . . ? 
C21 N11 C22 C23 -1.3(11) . . . . ? 
Ag2 N11 C22 C23 -176.9(6) . . . . ? 
N11 C22 C23 C24 3.1(12) . . . . ? 
C21 N12 C24 C23 -1.7(10) . . . . ? 
Ag3 N12 C24 C23 151.7(6) . . . . ? 
C22 C23 C24 N12 -1.5(11) . . . . ? 
C28 N13 C25 N14 -5.2(10) . . . . ? 
Ag1 N13 C25 N14 150.7(5) . . . . ? 
C28 N13 C25 S4 176.7(5) . . . . ? 
Ag1 N13 C25 S4 -27.3(6) . . . . ? 
C26 N14 C25 N13 4.8(9) . . . . ? 
Ag4 N14 C25 N13 -168.2(5) . . . . ? 
C26 N14 C25 S4 -177.1(5) . . . . ? 
Ag4 N14 C25 S4 9.9(6) . . . . ? 
C29 S4 C25 N13 -92.6(5) . . . . ? 
C29 S4 C25 N14 89.2(5) . . . . ? 
C25 N14 C26 C27 0.0(10) . . . . ? 
Ag4 N14 C26 C27 172.7(6) . . . . ? 
N14 C26 C27 C28 -3.7(12) . . . . ? 
C25 N13 C28 C27 1.0(11) . . . . ? 
Ag1 N13 C28 C27 -152.4(6) . . . . ? 
C26 C27 C28 N13 3.2(12) . . . . ? 
C30 N15 C29 N16 -1.5(12) . . . . ? 
C30 N15 C29 S4 -179.5(7) . . . . ? 
C32 N16 C29 N15 1.8(11) . . . . ? 
Ag3 N16 C29 N15 -175.4(6) . . . . ? 
C32 N16 C29 S4 180.0(5) . . . . ? 
Ag3 N16 C29 S4 2.7(7) . . . . ? 
C25 S4 C29 N15 0.4(6) . . . . ? 
C25 S4 C29 N16 -177.9(5) . . . . ? 
C29 N15 C30 C31 1.9(16) . . . . ? 
N15 C30 C31 C32 -2.7(19) . . . . ? 
C29 N16 C32 C31 -2.6(12) . . . . ? 
Ag3 N16 C32 C31 174.9(8) . . . . ? 
C30 C31 C32 N16 3.0(16) . . . . ? 
C36 N17 C33 C34 -0.5(11) . . . . ? 
Ag3 N17 C33 C34 172.2(7) . . . . ? 
N17 C33 C34 C35 -0.9(14) . . . . ? 
C36 N18 C35 C34 1.1(13) . . . . ? 
Ag5 N18 C35 C34 178.6(7) . . . . ? 
C33 C34 C35 N18 0.6(14) . . . . ? 
C33 N17 C36 N18 2.5(10) . . . . ? 
Ag3 N17 C36 N18 -170.3(5) . . . . ? 
C33 N17 C36 S5 178.5(5) . . . . ? 
Ag3 N17 C36 S5 5.6(7) . . . . ? 
C35 N18 C36 N17 -2.9(11) . . . . ? 
Ag5 N18 C36 N17 179.6(5) . . . . ? 
C35 N18 C36 S5 -178.8(6) . . . . ? 
Ag5 N18 C36 S5 3.7(7) . . . . ? 
C37 S5 C36 N17 94.2(5) . . . . ? 
C37 S5 C36 N18 -89.4(6) . . . . ? 
C40 N19 C37 N20 -1.1(10) . . . . ? 
C40 N19 C37 S5 177.9(6) . . . . ? 
C38 N20 C37 N19 0.4(10) . . . . ? 
Ag6 N20 C37 N19 -175.5(5) . . . . ? 
C38 N20 C37 S5 -178.7(5) . . . . ? 
Ag6 N20 C37 S5 5.3(6) . . . . ? 
C36 S5 C37 N19 -5.2(6) . . . . ? 
C36 S5 C37 N20 174.0(4) . . . . ? 
C37 N20 C38 C39 1.0(10) . . . . ? 
Ag6 N20 C38 C39 177.0(6) . . . . ? 
N20 C38 C39 C40 -1.7(13) . . . . ? 
C37 N19 C40 C39 0.4(12) . . . . ? 
C38 C39 C40 N19 0.9(13) . . . . ? 
C44 N21 C41 C42 0.9(11) . . . . ? 
Ag3 N21 C41 C42 -177.3(7) . . . . ? 
N21 C41 C42 C43 0.2(14) . . . . ? 
C44 N22 C43 C42 1.9(13) . . . . ? 
C41 C42 C43 N22 -1.7(15) . . . . ? 
C43 N22 C44 N21 -0.7(11) . . . . ? 
C43 N22 C44 S6 179.6(6) . . . . ? 
C41 N21 C44 N22 -0.7(10) . . . . ? 
Ag3 N21 C44 N22 177.5(5) . . . . ? 
C41 N21 C44 S6 179.0(5) . . . . ? 
Ag3 N21 C44 S6 -2.8(7) . . . . ? 
C45 S6 C44 N22 2.3(6) . . . . ? 
C45 S6 C44 N21 -177.4(5) . . . . ? 
C46 N23 C45 N24 -5.5(11) . . . . ? 
Ag6 N23 C45 N24 166.0(5) . . . . ? 
C46 N23 C45 S6 175.4(6) . . . . ? 
Ag6 N23 C45 S6 -13.0(7) . . . . ? 
C48 N24 C45 N23 4.9(11) . . . . ? 
Ag4 N24 C45 N23 -170.2(5) . . . . ? 
C48 N24 C45 S6 -176.1(6) . . . . ? 
Ag4 N24 C45 S6 8.9(7) . . . . ? 
C44 S6 C45 N23 -86.6(6) . . . . ? 
C44 S6 C45 N24 94.2(5) . . . . ? 
C45 N23 C46 C47 1.9(13) . . . . ? 
Ag6 N23 C46 C47 -169.2(8) . . . . ? 
N23 C46 C47 C48 2.0(16) . . . . ? 
C45 N24 C48 C47 -0.4(12) . . . . ? 
Ag4 N24 C48 C47 174.4(7) . . . . ? 
C46 C47 C48 N24 -2.8(15) . . . . ? 
O2 S7 C49 F11 175.5(11) . . . . ? 
O3 S7 C49 F11 -63.0(13) . . . . ? 
O1 S7 C49 F11 59.2(13) . . . . ? 
O2 S7 C49 F12 51.8(13) . . . . ? 
O3 S7 C49 F12 173.4(11) . . . . ? 
O1 S7 C49 F12 -64.4(12) . . . . ? 
O2 S7 C49 F13 -65.6(12) . . . . ? 
O3 S7 C49 F13 56.0(12) . . . . ? 
O1 S7 C49 F13 178.2(11) . . . . ? 
O6 S8' S8 O5 -89(11) . . . . ? 
O4 S8' S8 O5 131.4(6) . . . . ? 
C50 S8' S8 O5 -117.0(6) . . . . ? 
C50' S8' S8 O5 -122.8(12) . . . . ? 
O6 S8' S8 O4 139(10) . . . . ? 
O5 S8' S8 O4 -131.4(6) . . . . ? 
C50 S8' S8 O4 111.6(5) . . . . ? 
C50' S8' S8 O4 105.9(12) . . . . ? 
O6 S8' S8 O6' -20(15) . . . . ? 
O5 S8' S8 O6' 70(6) . . . . ? 
O4 S8' S8 O6' -159(6) . . . . ? 
C50 S8' S8 O6' -47(6) . . . . ? 
C50' S8' S8 O6' -53(7) . . . . ? 
O6 S8' S8 C50 28(11) . . . . ? 
O5 S8' S8 C50 117.0(6) . . . . ? 
O4 S8' S8 C50 -111.6(5) . . . . ? 
C50' S8' S8 C50 -5.8(12) . . . . ? 
O5 S8' S8 O6 89(11) . . . . ? 
O4 S8' S8 O6 -139(10) . . . . ? 
C50 S8' S8 O6 -28(11) . . . . ? 
C50' S8' S8 O6 -33(10) . . . . ? 
O6 S8' S8 F23 32(11) . . . . ? 
O5 S8' S8 F23 121.6(10) . . . . ? 
O4 S8' S8 F23 -107.0(9) . . . . ? 
C50 S8' S8 F23 4.6(9) . . . . ? 
C50' S8' S8 F23 -1.1(18) . . . . ? 
O5 S8 O4 S8' -72.5(12) . . . . ? 
O6' S8 O4 S8' 175.4(15) . . . . ? 
C50 S8 O4 S8' 78.0(10) . . . . ? 
O6 S8 O4 S8' 2.8(8) . . . . ? 
F23 S8 O4 S8' 121.5(11) . . . . ? 
O6 S8' O4 S8 -175.2(14) . . . . ? 
O5 S8' O4 S8 50.7(9) . . . . ? 
C50 S8' O4 S8 -67.4(10) . . . . ? 
C50' S8' O4 S8 -123.3(13) . . . . ? 
O4 S8 O5 S8' 73.7(12) . . . . ? 
O6' S8 O5 S8' -168.5(14) . . . . ? 
C50 S8 O5 S8' -75.6(10) . . . . ? 
O6 S8 O5 S8' -4.4(9) . . . . ? 
F23 S8 O5 S8' -122.0(13) . . . . ? 
S8' S8 O5 Ag4 136(8) . . . . ? 
O4 S8 O5 Ag4 -150(8) . . . . ? 
O6' S8 O5 Ag4 -33(9) . . . . ? 
C50 S8 O5 Ag4 60(9) . . . . ? 
O6 S8 O5 Ag4 132(8) . . . . ? 
F23 S8 O5 Ag4 14(9) . . . . ? 
O6 S8' O5 S8 172.9(14) . . . . ? 
O4 S8' O5 S8 -50.4(9) . . . . ? 
C50 S8' O5 S8 65.0(10) . . . . ? 
C50' S8' O5 S8 122.7(15) . . . . ? 
S8 S8' O5 Ag4 -173.7(14) . . . . ? 
O6 S8' O5 Ag4 -0.7(16) . . . . ? 
O4 S8' O5 Ag4 135.9(10) . . . . ? 
C50 S8' O5 Ag4 -108.7(13) . . . . ? 
C50' S8' O5 Ag4 -51.0(18) . . . . ? 
N14 Ag4 O5 S8 -86(9) . . . . ? 
N24 Ag4 O5 S8 96(9) . . . . ? 
N14 Ag4 O5 S8' 44.0(13) . . . . ? 
N24 Ag4 O5 S8' -134.1(13) . . . . ? 
S8 S8' O6 C50' -37(11) . . . . ? 
O5 S8' O6 C50' -123.5(10) . . . . ? 
O4 S8' O6 C50' 100.6(10) . . . . ? 
C50 S8' O6 C50' -9.7(10) . . . . ? 
O5 S8' O6 S8 -87(11) . . . . ? 
O4 S8' O6 S8 137(11) . . . . ? 
C50 S8' O6 S8 27(10) . . . . ? 
C50' S8' O6 S8 37(11) . . . . ? 
O5 S8 O6 S8' 90(11) . . . . ? 
O4 S8 O6 S8' -40(10) . . . . ? 
O6' S8 O6 S8' 165(12) . . . . ? 
C50 S8 O6 S8' -152(11) . . . . ? 
F23 S8 O6 S8' -149(11) . . . . ? 
S8' S8 O6 C50' 143(11) . . . . ? 
O5 S8 O6 C50' -126.8(10) . . . . ? 
O4 S8 O6 C50' 102.8(10) . . . . ? 
O6' S8 O6 C50' -51(3) . . . . ? 
C50 S8 O6 C50' -8.7(9) . . . . ? 
F23 S8 O6 C50' -5.8(10) . . . . ? 
S8' S8 O6' F23 59(6) . . . . ? 
O5 S8 O6' F23 127.5(8) . . . . ? 
O4 S8 O6' F23 -98.8(8) . . . . ? 
C50 S8 O6' F23 12.6(8) . . . . ? 
O6 S8 O6' F23 54(3) . . . . ? 
S8 O6' F23 C50 -15.3(10) . . . . ? 
S8' S8 F23 C50 -6.9(13) . . . . ? 
O5 S8 F23 C50 92.4(10) . . . . ? 
O4 S8 F23 C50 -100.4(8) . . . . ? 
O6' S8 F23 C50 160.6(12) . . . . ? 
O6 S8 F23 C50 -4.3(8) . . . . ? 
S8' S8 F23 O6' -167.6(16) . . . . ? 
O5 S8 F23 O6' -68.2(11) . . . . ? 
O4 S8 F23 O6' 99.0(10) . . . . ? 
C50 S8 F23 O6' -160.6(12) . . . . ? 
O6 S8 F23 O6' -165.0(10) . . . . ? 
C50' F22 C50 F21 82.8(12) . . . . ? 
C50' F22 C50 F23 -174.6(11) . . . . ? 
C50' F22 C50 S8 -85.3(13) . . . . ? 
C50' F22 C50 S8' -58.3(11) . . . . ? 
O6' F23 C50 F22 139.0(10) . . . . ? 
S8 F23 C50 F22 125.1(9) . . . . ? 
O6' F23 C50 F21 -106.9(10) . . . . ? 
S8 F23 C50 F21 -120.8(9) . . . . ? 
O6' F23 C50 S8 13.9(9) . . . . ? 
O6' F23 C50 C50' 111(7) . . . . ? 
S8 F23 C50 C50' 97(7) . . . . ? 
O6' F23 C50 S8' 16.5(11) . . . . ? 
S8 F23 C50 S8' 2.6(5) . . . . ? 
S8' S8 C50 F22 80.5(15) . . . . ? 
O5 S8 C50 F22 156.0(12) . . . . ? 
O4 S8 C50 F22 0.9(15) . . . . ? 
O6' S8 C50 F22 -108.5(14) . . . . ? 
O6 S8 C50 F22 82.6(12) . . . . ? 
F23 S8 C50 F22 -93.5(12) . . . . ? 
S8' S8 C50 F21 -86.6(13) . . . . ? 
O5 S8 C50 F21 -11.2(14) . . . . ? 
O4 S8 C50 F21 -166.2(9) . . . . ? 
O6' S8 C50 F21 84.4(12) . . . . ? 
O6 S8 C50 F21 -84.6(10) . . . . ? 
F23 S8 C50 F21 99.3(12) . . . . ? 
S8' S8 C50 F23 174.0(11) . . . . ? 
O5 S8 C50 F23 -110.5(10) . . . . ? 
O4 S8 C50 F23 94.5(8) . . . . ? 
O6' S8 C50 F23 -14.9(10) . . . . ? 
O6 S8 C50 F23 176.1(8) . . . . ? 
S8' S8 C50 C50' 5.3(12) . . . . ? 
O5 S8 C50 C50' 80.8(11) . . . . ? 
O4 S8 C50 C50' -74.3(9) . . . . ? 
O6' S8 C50 C50' 176.3(10) . . . . ? 
O6 S8 C50 C50' 7.4(8) . . . . ? 
F23 S8 C50 C50' -168.7(11) . . . . ? 
O5 S8 C50 S8' 75.5(11) . . . . ? 
O4 S8 C50 S8' -79.6(10) . . . . ? 
O6' S8 C50 S8' 171.0(13) . . . . ? 
O6 S8 C50 S8' 2.1(8) . . . . ? 
F23 S8 C50 S8' -174.0(11) . . . . ? 
S8 S8' C50 F22 -113.9(13) . . . . ? 
O6 S8' C50 F22 69.2(11) . . . . ? 
O5 S8' C50 F22 -174.7(10) . . . . ? 
O4 S8' C50 F22 -51.6(11) . . . . ? 
C50' S8' C50 F22 60.5(12) . . . . ? 
S8 S8' C50 F21 106.5(13) . . . . ? 
O6 S8' C50 F21 -70.4(10) . . . . ? 
O5 S8' C50 F21 45.7(11) . . . . ? 
O4 S8' C50 F21 168.8(9) . . . . ? 
C50' S8' C50 F21 -79.1(12) . . . . ? 
S8 S8' C50 F23 -6.3(12) . . . . ? 
O6 S8' C50 F23 176.7(9) . . . . ? 
O5 S8' C50 F23 -67.1(10) . . . . ? 
O4 S8' C50 F23 56.0(9) . . . . ? 
C50' S8' C50 F23 168.1(12) . . . . ? 
O6 S8' C50 S8 -176.9(12) . . . . ? 
O5 S8' C50 S8 -60.8(9) . . . . ? 
O4 S8' C50 S8 62.3(8) . . . . ? 
C50' S8' C50 S8 174.4(12) . . . . ? 
S8 S8' C50 C50' -174.4(12) . . . . ? 
O6 S8' C50 C50' 8.7(9) . . . . ? 
O5 S8' C50 C50' 124.8(9) . . . . ? 
O4 S8' C50 C50' -112.1(8) . . . . ? 
S8' O6 C50' C50 9.9(10) . . . . ? 
S8 O6 C50' C50 8.6(9) . . . . ? 
S8' O6 C50' F22 -24.7(15) . . . . ? 
S8 O6 C50' F22 -26.0(14) . . . . ? 
S8 O6 C50' S8' -1.3(4) . . . . ? 
F22 C50 C50' O6 -135.8(12) . . . . ? 
F21 C50 C50' O6 110.4(11) . . . . ? 
F23 C50 C50' O6 -107(7) . . . . ? 
S8 C50 C50' O6 -10.5(11) . . . . ? 
S8' C50 C50' O6 -8.3(8) . . . . ? 
F21 C50 C50' F22 -113.9(9) . . . . ? 
F23 C50 C50' F22 29(6) . . . . ? 
S8 C50 C50' F22 125.2(9) . . . . ? 
S8' C50 C50' F22 127.5(8) . . . . ? 
F22 C50 C50' S8' -127.5(8) . . . . ? 
F21 C50 C50' S8' 118.7(7) . . . . ? 
F23 C50 C50' S8' -99(7) . . . . ? 
S8 C50 C50' S8' -2.3(5) . . . . ? 
C50 F22 C50' O6 57.8(15) . . . . ? 
C50 F22 C50' S8' 41.0(7) . . . . ? 
S8 S8' C50' O6 175.0(15) . . . . ? 
O5 S8' C50' O6 83.1(11) . . . . ? 
O4 S8' C50' O6 -103.8(9) . . . . ? 
C50 S8' C50' O6 168.1(12) . . . . ? 
S8 S8' C50' C50 6.9(15) . . . . ? 
O6 S8' C50' C50 -168.1(12) . . . . ? 
O5 S8' C50' C50 -85.0(11) . . . . ? 
O4 S8' C50' C50 88.2(7) . . . . ? 
S8 S8' C50' F22 -25.0(16) . . . . ? 
O6 S8' C50' F22 160.0(13) . . . . ? 
O5 S8' C50' F22 -116.9(9) . . . . ? 
O4 S8' C50' F22 56.2(9) . . . . ? 
C50 S8' C50' F22 -31.9(6) . . . . ? 
O9 S9 O7 Ag6 -140.1(6) . . . . ? 
O8 S9 O7 Ag6 -4.8(8) . . . . ? 
C51 S9 O7 Ag6 108.8(8) . . . . ? 
N20 Ag6 O7 S9 -174.2(4) . . . . ? 
N23 Ag6 O7 S9 60.4(5) . . . . ? 
N2 Ag6 O7 S9 -53.4(5) 1_445 . . . ? 
O9 S9 C51 F32 -174.7(15) . . . . ? 
O7 S9 C51 F32 -55.5(18) . . . . ? 
O8 S9 C51 F32 64.4(17) . . . . ? 
O9 S9 C51 F31 -50.8(15) . . . . ? 
O7 S9 C51 F31 68.3(14) . . . . ? 
O8 S9 C51 F31 -171.7(13) . . . . ? 
O9 S9 C51 F33 68.3(14) . . . . ? 
O7 S9 C51 F33 -172.5(11) . . . . ? 
O8 S9 C51 F33 -52.6(13) . . . . ? 
O10 S10 C52 F41 -60.3(16) . . . . ? 
O12 S10 C52 F41 57.2(16) . . . . ? 
O11 S10 C52 F41 -178.2(14) . . . . ? 
O10 S10 C52 F42 57.1(15) . . . . ? 
O12 S10 C52 F42 174.5(14) . . . . ? 
O11 S10 C52 F42 -60.8(16) . . . . ? 
O10 S10 C52 F43 175.8(14) . . . . ? 
O12 S10 C52 F43 -66.7(16) . . . . ? 
O11 S10 C52 F43 58.0(17) . . . . ? 
O14 S11 C53 F53 178.5(13) . . . . ? 
O13 S11 C53 F53 58.6(15) . . . . ? 
O15 S11 C53 F53 -59.0(14) . . . . ? 
O14 S11 C53 F52 -54.4(16) . . . . ? 
O13 S11 C53 F52 -174.3(13) . . . . ? 
O15 S11 C53 F52 68.1(15) . . . . ? 
O14 S11 C53 F51 63.7(12) . . . . ? 
O13 S11 C53 F51 -56.2(12) . . . . ? 
O15 S11 C53 F51 -173.8(11) . . . . ? 
O17 S12 C54 F63 -61.6(14) . . . . ? 
O18 S12 C54 F63 61.4(13) . . . . ? 
O16 S12 C54 F63 -177.1(12) . . . . ? 
O17 S12 C54 F62 177.5(12) . . . . ? 
O18 S12 C54 F62 -59.4(12) . . . . ? 
O16 S12 C54 F62 62.0(12) . . . . ? 
O17 S12 C54 F61 62.3(12) . . . . ? 
O18 S12 C54 F61 -174.6(9) . . . . ? 
O16 S12 C54 F61 -53.2(11) . . . . ? 
 
_diffrn_measured_fraction_theta_max    0.993 
_diffrn_reflns_theta_full              25.01 
_diffrn_measured_fraction_theta_full   0.993 
_refine_diff_density_max    1.180 
_refine_diff_density_min   -0.725 
_refine_diff_density_rms    0.116 

##########################END##########################

 
data_complex3 
 
_audit_creation_method            SHELXL-97 
_chemical_name_systematic 
; 
 ? 
; 
_chemical_name_common             ? 
_chemical_melting_point           ? 
_chemical_formula_moiety          ? 
_chemical_formula_sum 
 'C14 H6 Ag2 F10 N4 O4 S' 
_chemical_formula_weight          732.03 
 
loop_ 
 _atom_type_symbol 
 _atom_type_description 
 _atom_type_scat_dispersion_real 
 _atom_type_scat_dispersion_imag 
 _atom_type_scat_source 
 'C'  'C'   0.0033   0.0016 
 'International Tables Vol C Tables 4.2.6.8 and 6.1.1.4' 
 'H'  'H'   0.0000   0.0000 
 'International Tables Vol C Tables 4.2.6.8 and 6.1.1.4' 
 'N'  'N'   0.0061   0.0033 
 'International Tables Vol C Tables 4.2.6.8 and 6.1.1.4' 
 'O'  'O'   0.0106   0.0060 
 'International Tables Vol C Tables 4.2.6.8 and 6.1.1.4' 
 'F'  'F'   0.0171   0.0103 
 'International Tables Vol C Tables 4.2.6.8 and 6.1.1.4' 
 'S'  'S'   0.1246   0.1234 
 'International Tables Vol C Tables 4.2.6.8 and 6.1.1.4' 
 'Ag'  'Ag'  -0.8971   1.1015 
 'International Tables Vol C Tables 4.2.6.8 and 6.1.1.4' 
 
_symmetry_cell_setting            Monoclinic 
_symmetry_space_group_name_H-M    P2(1)/c 
 
loop_ 
 _symmetry_equiv_pos_as_xyz 
 'x, y, z' 
 '-x, y+1/2, -z+1/2' 
 '-x, -y, -z' 
 'x, -y-1/2, z-1/2' 
 
_cell_length_a                    12.429(5) 
_cell_length_b                    16.447(7) 
_cell_length_c                    10.574(5) 
_cell_angle_alpha                 90.00 
_cell_angle_beta                  93.629(8) 
_cell_angle_gamma                 90.00 
_cell_volume                      2157.3(16) 
_cell_formula_units_Z             4 
_cell_measurement_temperature     293(2) 
_cell_measurement_reflns_used     ? 
_cell_measurement_theta_min       ? 
_cell_measurement_theta_max       ? 
 
_exptl_crystal_description        block 
_exptl_crystal_colour             colorless 
_exptl_crystal_size_max           0.51 
_exptl_crystal_size_mid           0.32 
_exptl_crystal_size_min           0.19 
_exptl_crystal_density_meas       ? 
_exptl_crystal_density_diffrn     2.254 
_exptl_crystal_density_method     'not measured' 
_exptl_crystal_F_000              1400 
_exptl_absorpt_coefficient_mu     2.028 
_exptl_absorpt_correction_type    multi-scan
_exptl_absorpt_correction_T_min   0.296079 
_exptl_absorpt_correction_T_max   0.732468 
_exptl_absorpt_process_details    sadabs 
 
_exptl_special_details 
; 
 ? 
; 
 
_diffrn_ambient_temperature       293(2) 
_diffrn_radiation_wavelength      0.71073 
_diffrn_radiation_type            MoK\a 
_diffrn_radiation_source          'fine-focus sealed tube' 
_diffrn_radiation_monochromator   graphite 
_diffrn_measurement_device_type   ? 
_diffrn_measurement_method        ? 
_diffrn_detector_area_resol_mean  ? 
_diffrn_standards_number          ? 
_diffrn_standards_interval_count  ? 
_diffrn_standards_interval_time   ? 
_diffrn_standards_decay_%         ? 
_diffrn_reflns_number             11383 
_diffrn_reflns_av_R_equivalents   0.1051 
_diffrn_reflns_av_sigmaI/netI     0.1579 
_diffrn_reflns_limit_h_min        -13 
_diffrn_reflns_limit_h_max        14 
_diffrn_reflns_limit_k_min        -19 
_diffrn_reflns_limit_k_max        16 
_diffrn_reflns_limit_l_min        -12 
_diffrn_reflns_limit_l_max        12 
_diffrn_reflns_theta_min          1.64 
_diffrn_reflns_theta_max          25.01 
_reflns_number_total              3801 
_reflns_number_gt                 1787 
_reflns_threshold_expression      >2sigma(I) 
 
_computing_data_collection        'Bruker Smart ApexII detector'  
_computing_cell_refinement        'Bruker Smart ApexII'  
_computing_data_reduction         'Bruker SAINT' 
_computing_structure_solution     'SHELXS-97 (Sheldrick, 1990)' 
_computing_structure_refinement   'SHELXL-97 (Sheldrick, 1997)' 
_computing_molecular_graphics     'Bruker SHELXTL' 
_computing_publication_material   'Bruker SHELXTL'  
 
_refine_special_details 
; 
 Refinement of F^2^ against ALL reflections.  The weighted R-factor wR and 
 goodness of fit S are based on F^2^, conventional R-factors R are based 
 on F, with F set to zero for negative F^2^. The threshold expression of 
 F^2^ > 2sigma(F^2^) is used only for calculating R-factors(gt) etc. and is 
 not relevant to the choice of reflections for refinement.  R-factors based 
 on F^2^ are statistically about twice as large as those based on F, and R- 
 factors based on ALL data will be even larger. 
; 
 
_refine_ls_structure_factor_coef  Fsqd  
_refine_ls_matrix_type            full 
_refine_ls_weighting_scheme       calc  
_refine_ls_weighting_details 
 'calc w=1/[\s^2^(Fo^2^)+(0.0830P)^2^+43.8811P] where P=(Fo^2^+2Fc^2^)/3' 
_atom_sites_solution_primary      direct 
_atom_sites_solution_secondary    difmap 
_atom_sites_solution_hydrogens    geom 
_refine_ls_hydrogen_treatment     constr 
_refine_ls_extinction_method      none 
_refine_ls_extinction_coef        ? 
_refine_ls_number_reflns          3801 
_refine_ls_number_parameters      316 
_refine_ls_number_restraints      36 
_refine_ls_R_factor_all           0.1857 
_refine_ls_R_factor_gt            0.0866 
_refine_ls_wR_factor_ref          0.2887 
_refine_ls_wR_factor_gt           0.2054 
_refine_ls_goodness_of_fit_ref    1.084 
_refine_ls_restrained_S_all       1.083 
_refine_ls_shift/su_max           0.000 
_refine_ls_shift/su_mean          0.000 
 
loop_ 
 _atom_site_label 
 _atom_site_type_symbol 
 _atom_site_fract_x 
 _atom_site_fract_y 
 _atom_site_fract_z 
 _atom_site_U_iso_or_equiv 
 _atom_site_adp_type 
 _atom_site_occupancy 
 _atom_site_symmetry_multiplicity 
 _atom_site_calc_flag 
 _atom_site_refinement_flags 
 _atom_site_disorder_assembly 
 _atom_site_disorder_group 
Ag1 Ag 0.62865(14) 0.27358(10) 1.07742(13) 0.0588(6) Uani 1 1 d . . . 
Ag2 Ag 0.41549(15) 0.52127(11) 0.84632(15) 0.0641(6) Uani 1 1 d . . . 
S1 S 0.5326(4) 0.3416(3) 0.8110(4) 0.0422(11) Uani 1 1 d . . . 
N1 N 0.4202(13) 0.4383(9) 0.6559(13) 0.045(4) Uani 1 1 d . . . 
N2 N 0.5177(12) 0.3369(8) 0.5575(12) 0.042(4) Uani 1 1 d . . . 
N3 N 0.7187(13) 0.3503(9) 0.9289(12) 0.044(4) Uani 1 1 d . . . 
N4 N 0.7106(13) 0.4115(9) 0.7302(13) 0.045(4) Uani 1 1 d . . . 
C1 C 0.3756(18) 0.4602(11) 0.5426(18) 0.056(5) Uani 1 1 d . . . 
H1A H 0.3254 0.5022 0.5378 0.068 Uiso 1 1 calc R . . 
C2 C 0.4027(16) 0.4217(12) 0.4314(17) 0.052(5) Uani 1 1 d . . . 
H2A H 0.3733 0.4380 0.3524 0.063 Uiso 1 1 calc R . . 
C3 C 0.4728(17) 0.3604(10) 0.4439(15) 0.047(5) Uani 1 1 d . . . 
H3A H 0.4914 0.3329 0.3716 0.057 Uiso 1 1 calc R . . 
C4 C 0.4856(14) 0.3767(10) 0.6567(14) 0.035(4) Uani 1 1 d . . . 
C5 C 0.6678(15) 0.3702(9) 0.8214(12) 0.036(4) Uani 1 1 d . . . 
C6 C 0.8125(19) 0.4324(12) 0.7497(19) 0.057(5) Uani 1 1 d . . . 
H6A H 0.8444 0.4635 0.6888 0.069 Uiso 1 1 calc R . . 
C7 C 0.8727(18) 0.4102(15) 0.8556(19) 0.069(6) Uani 1 1 d . . . 
H7A H 0.9456 0.4230 0.8652 0.082 Uiso 1 1 calc R . . 
C8 C 0.8227(17) 0.3680(11) 0.9490(16) 0.048(5) Uani 1 1 d . . . 
H8A H 0.8608 0.3525 1.0236 0.058 Uiso 1 1 calc R . . 
O3 O 0.4494(16) 0.3567(14) 1.1288(14) 0.103(7) Uani 1 1 d . . . 
O4 O 0.374(2) 0.4608(12) 1.039(2) 0.140(10) Uani 1 1 d . . . 
C12 C 0.3742(17) 0.3908(14) 1.0729(19) 0.054(5) Uani 1 1 d D . . 
C13 C 0.279(4) 0.341(3) 1.094(2) 0.176(17) Uani 1 1 d DU . . 
C14 C 0.2057(19) 0.3335(17) 0.976(3) 0.30(4) Uani 1 1 d DU . . 
F21 F 0.2061(17) 0.3640(17) 1.1909(19) 0.170(10) Uani 1 1 d . . . 
F22 F 0.290(3) 0.2536(18) 1.125(4) 0.281(19) Uani 1 1 d . . . 
F23 F 0.2844(19) 0.298(2) 0.918(3) 0.260(19) Uani 1 1 d D . . 
F24 F 0.1257(19) 0.2871(19) 1.018(4) 0.280(19) Uani 1 1 d D . . 
F25 F 0.192(3) 0.4124(17) 0.971(4) 0.36(3) Uani 1 1 d D . . 
O1 O 0.2262(15) 0.7110(10) 0.7740(16) 0.086(5) Uani 1 1 d . . . 
O2 O 0.2865(19) 0.5965(16) 0.719(2) 0.149(11) Uani 1 1 d . . . 
C9 C 0.226(2) 0.6495(19) 0.7121(19) 0.070(7) Uani 1 1 d . . . 
C10 C 0.127(2) 0.6296(14) 0.620(2) 0.087(8) Uani 1 1 d D . . 
C11 C 0.027(4) 0.6259(16) 0.667(3) 0.22(2) Uani 1 1 d DU . . 
F11 F 0.1319(19) 0.6769(16) 0.5179(16) 0.166(10) Uani 1 1 d D . . 
F12 F 0.127(2) 0.5536(18) 0.565(3) 0.229(16) Uani 1 1 d D . . 
F13 F 0.018(3) 0.7049(14) 0.695(3) 0.268(19) Uani 1 1 d D . . 
F14 F -0.0514(17) 0.6032(15) 0.582(2) 0.209(13) Uani 1 1 d D . . 
F15 F 0.0275(16) 0.5791(15) 0.7696(17) 0.172(10) Uani 1 1 d D . . 
 
loop_ 
 _atom_site_aniso_label 
 _atom_site_aniso_U_11 
 _atom_site_aniso_U_22 
 _atom_site_aniso_U_33 
 _atom_site_aniso_U_23 
 _atom_site_aniso_U_13 
 _atom_site_aniso_U_12 
Ag1 0.0803(12) 0.0555(10) 0.0392(8) 0.0124(7) -0.0060(7) -0.0265(9) 
Ag2 0.0831(13) 0.0579(11) 0.0504(9) -0.0082(8) -0.0028(8) 0.0035(9) 
S1 0.052(3) 0.048(3) 0.027(2) 0.0074(19) 0.0038(19) 0.000(2) 
N1 0.070(11) 0.028(8) 0.035(8) -0.008(6) -0.008(7) 0.021(8) 
N2 0.074(11) 0.027(8) 0.025(7) -0.003(6) 0.005(7) 0.010(7) 
N3 0.060(11) 0.048(9) 0.024(7) 0.009(7) -0.002(7) -0.011(8) 
N4 0.068(12) 0.036(9) 0.033(8) 0.009(7) 0.013(8) -0.007(8) 
C1 0.084(15) 0.036(11) 0.049(12) -0.003(9) -0.001(11) 0.027(10) 
C2 0.073(14) 0.045(12) 0.037(10) 0.011(9) -0.011(9) 0.027(10) 
C3 0.087(15) 0.027(10) 0.028(9) -0.006(8) 0.012(9) -0.005(10) 
C4 0.048(11) 0.030(10) 0.028(8) 0.002(7) 0.002(8) 0.001(8) 
C5 0.084(13) 0.024(9) 0.001(6) 0.002(6) 0.003(7) 0.004(8) 
C6 0.081(16) 0.041(12) 0.052(12) 0.006(10) 0.014(11) -0.013(11) 
C7 0.062(14) 0.088(17) 0.053(13) 0.007(12) -0.016(11) -0.022(12) 
C8 0.065(14) 0.045(12) 0.033(9) 0.004(8) -0.003(9) 0.002(10) 
O3 0.097(14) 0.17(2) 0.042(9) -0.010(11) 0.010(9) 0.030(14) 
O4 0.26(3) 0.051(12) 0.120(17) -0.007(11) 0.118(19) -0.001(14) 
C12 0.068(16) 0.050(14) 0.048(12) -0.008(10) 0.030(11) 0.013(11) 
C13 0.176(17) 0.176(17) 0.176(17) 0.000(2) 0.011(2) 0.000(2) 
C14 0.30(4) 0.30(4) 0.30(4) 0.000(2) 0.019(3) 0.000(2) 
F21 0.141(17) 0.25(3) 0.125(16) -0.042(17) 0.048(14) -0.036(17) 
F22 0.38(5) 0.13(2) 0.35(5) 0.04(3) 0.12(4) 0.07(3) 
F23 0.15(2) 0.35(4) 0.28(4) -0.21(3) 0.06(2) -0.09(2) 
F24 0.13(2) 0.26(4) 0.45(6) -0.05(4) 0.00(3) -0.06(2) 
F25 0.41(6) 0.21(4) 0.44(7) 0.10(4) -0.20(5) 0.01(4) 
O1 0.117(14) 0.057(11) 0.078(11) 0.002(9) -0.046(10) 0.000(10) 
O2 0.15(2) 0.17(2) 0.113(16) -0.072(16) -0.066(15) 0.102(19) 
C9 0.081(17) 0.10(2) 0.034(11) 0.008(13) 0.003(11) 0.029(16) 
C10 0.08(2) 0.10(2) 0.073(17) -0.019(16) -0.009(14) -0.008(16) 
C11 0.22(2) 0.22(2) 0.22(2) 0.000(2) 0.014(3) 0.000(2) 
F11 0.20(2) 0.23(3) 0.070(11) 0.049(14) -0.039(12) -0.099(19) 
F12 0.19(2) 0.27(3) 0.22(3) -0.18(3) -0.05(2) 0.08(2) 
F13 0.25(3) 0.15(2) 0.39(5) -0.09(3) -0.14(3) 0.01(2) 
F14 0.132(17) 0.32(4) 0.17(2) 0.00(2) -0.048(15) -0.13(2) 
F15 0.147(17) 0.26(3) 0.108(14) 0.056(16) 0.002(12) -0.100(18) 
 
_geom_special_details 
; 
 All esds (except the esd in the dihedral angle between two l.s. planes) 
 are estimated using the full covariance matrix.  The cell esds are taken 
 into account individually in the estimation of esds in distances, angles 
 and torsion angles; correlations between esds in cell parameters are only 
 used when they are defined by crystal symmetry.  An approximate (isotropic) 
 treatment of cell esds is used for estimating esds involving l.s. planes. 
; 
 
loop_ 
 _geom_bond_atom_site_label_1 
 _geom_bond_atom_site_label_2 
 _geom_bond_distance 
 _geom_bond_site_symmetry_2 
 _geom_bond_publ_flag 
Ag1 N2 2.283(14) 4_566 ? 
Ag1 O1 2.330(15) 3_667 ? 
Ag1 N3 2.353(14) . ? 
Ag2 O4 2.350(19) . ? 
Ag2 O2 2.38(2) . ? 
Ag2 N1 2.436(13) . ? 
S1 C5 1.74(2) . ? 
S1 C4 1.793(16) . ? 
N1 C4 1.30(2) . ? 
N1 C1 1.34(2) . ? 
N2 C4 1.32(2) . ? 
N2 C3 1.35(2) . ? 
N2 Ag1 2.283(14) 4_565 ? 
N3 C5 1.307(19) . ? 
N3 C8 1.33(2) . ? 
N4 C6 1.32(2) . ? 
N4 C5 1.319(19) . ? 
C1 C2 1.40(3) . ? 
C1 H1A 0.9300 . ? 
C2 C3 1.33(2) . ? 
C2 H2A 0.9300 . ? 
C3 H3A 0.9300 . ? 
C6 C7 1.36(3) . ? 
C6 H6A 0.9300 . ? 
C7 C8 1.39(3) . ? 
C7 H7A 0.9300 . ? 
C8 H8A 0.9300 . ? 
O3 C12 1.21(2) . ? 
O4 C12 1.21(3) . ? 
C12 C13 1.47(5) . ? 
C13 F21 1.46(4) . ? 
C13 F22 1.48(4) . ? 
C13 C14 1.504(19) . ? 
C14 F25 1.311(19) . ? 
C14 F23 1.322(19) . ? 
C14 F24 1.352(19) . ? 
O1 C9 1.21(3) . ? 
O1 Ag1 2.330(15) 3_667 ? 
O2 C9 1.15(3) . ? 
C9 C10 1.56(3) . ? 
C10 F11 1.333(17) . ? 
C10 C11 1.37(5) . ? 
C10 F12 1.379(18) . ? 
C11 F15 1.33(2) . ? 
C11 F14 1.34(2) . ? 
C11 F13 1.34(2) . ? 
 
loop_ 
 _geom_angle_atom_site_label_1 
 _geom_angle_atom_site_label_2 
 _geom_angle_atom_site_label_3 
 _geom_angle 
 _geom_angle_site_symmetry_1 
 _geom_angle_site_symmetry_3 
 _geom_angle_publ_flag 
N2 Ag1 O1 125.9(5) 4_566 3_667 ? 
N2 Ag1 N3 132.5(5) 4_566 . ? 
O1 Ag1 N3 90.7(6) 3_667 . ? 
O4 Ag2 O2 122.4(10) . . ? 
O4 Ag2 N1 119.8(6) . . ? 
O2 Ag2 N1 82.7(6) . . ? 
C5 S1 C4 103.2(7) . . ? 
C4 N1 C1 116.1(14) . . ? 
C4 N1 Ag2 118.6(11) . . ? 
C1 N1 Ag2 124.0(11) . . ? 
C4 N2 C3 115.9(14) . . ? 
C4 N2 Ag1 122.2(11) . 4_565 ? 
C3 N2 Ag1 121.6(11) . 4_565 ? 
C5 N3 C8 119.7(15) . . ? 
C5 N3 Ag1 119.4(12) . . ? 
C8 N3 Ag1 120.7(11) . . ? 
C6 N4 C5 116.7(16) . . ? 
N1 C1 C2 121.6(16) . . ? 
N1 C1 H1A 119.2 . . ? 
C2 C1 H1A 119.2 . . ? 
C3 C2 C1 116.8(16) . . ? 
C3 C2 H2A 121.6 . . ? 
C1 C2 H2A 121.6 . . ? 
C2 C3 N2 122.4(16) . . ? 
C2 C3 H3A 118.8 . . ? 
N2 C3 H3A 118.8 . . ? 
N1 C4 N2 127.0(15) . . ? 
N1 C4 S1 115.1(12) . . ? 
N2 C4 S1 117.8(12) . . ? 
N3 C5 N4 124.7(18) . . ? 
N3 C5 S1 113.5(12) . . ? 
N4 C5 S1 121.7(13) . . ? 
N4 C6 C7 122.3(19) . . ? 
N4 C6 H6A 118.9 . . ? 
C7 C6 H6A 118.9 . . ? 
C6 C7 C8 118(2) . . ? 
C6 C7 H7A 120.8 . . ? 
C8 C7 H7A 120.8 . . ? 
N3 C8 C7 118.1(17) . . ? 
N3 C8 H8A 120.9 . . ? 
C7 C8 H8A 120.9 . . ? 
C12 O4 Ag2 131.9(15) . . ? 
O4 C12 O3 125(3) . . ? 
O4 C12 C13 126(3) . . ? 
O3 C12 C13 106(2) . . ? 
F21 C13 C12 120(3) . . ? 
F21 C13 F22 98(3) . . ? 
C12 C13 F22 121(3) . . ? 
F21 C13 C14 104(3) . . ? 
C12 C13 C14 112(3) . . ? 
F22 C13 C14 98(3) . . ? 
F25 C14 F23 121.7(17) . . ? 
F25 C14 F24 118.2(16) . . ? 
F23 C14 F24 118.8(16) . . ? 
F25 C14 C13 91.0(15) . . ? 
F23 C14 C13 89.6(15) . . ? 
F24 C14 C13 101(4) . . ? 
C9 O1 Ag1 115.5(16) . 3_667 ? 
C9 O2 Ag2 147.5(18) . . ? 
O2 C9 O1 129(3) . . ? 
O2 C9 C10 111(3) . . ? 
O1 C9 C10 119(2) . . ? 
F11 C10 C11 114(2) . . ? 
F11 C10 F12 101(2) . . ? 
C11 C10 F12 98(2) . . ? 
F11 C10 C9 108(2) . . ? 
C11 C10 C9 119(2) . . ? 
F12 C10 C9 116(2) . . ? 
F15 C11 F14 111(2) . . ? 
F15 C11 F13 112(3) . . ? 
F14 C11 F13 111(3) . . ? 
F15 C11 C10 111(3) . . ? 
F14 C11 C10 114(3) . . ? 
F13 C11 C10 97(3) . . ? 
 
loop_ 
 _geom_torsion_atom_site_label_1 
 _geom_torsion_atom_site_label_2 
 _geom_torsion_atom_site_label_3 
 _geom_torsion_atom_site_label_4 
 _geom_torsion 
 _geom_torsion_site_symmetry_1 
 _geom_torsion_site_symmetry_2 
 _geom_torsion_site_symmetry_3 
 _geom_torsion_site_symmetry_4 
 _geom_torsion_publ_flag 
O4 Ag2 N1 C4 -58.1(17) . . . . ? 
O2 Ag2 N1 C4 178.6(16) . . . . ? 
O4 Ag2 N1 C1 135.4(17) . . . . ? 
O2 Ag2 N1 C1 12.0(18) . . . . ? 
N2 Ag1 N3 C5 43.2(16) 4_566 . . . ? 
O1 Ag1 N3 C5 -173.2(13) 3_667 . . . ? 
N2 Ag1 N3 C8 -131.5(13) 4_566 . . . ? 
O1 Ag1 N3 C8 12.1(14) 3_667 . . . ? 
C4 N1 C1 C2 -3(3) . . . . ? 
Ag2 N1 C1 C2 163.6(16) . . . . ? 
N1 C1 C2 C3 2(3) . . . . ? 
C1 C2 C3 N2 -1(3) . . . . ? 
C4 N2 C3 C2 2(3) . . . . ? 
Ag1 N2 C3 C2 175.8(15) 4_565 . . . ? 
C1 N1 C4 N2 4(3) . . . . ? 
Ag2 N1 C4 N2 -163.2(14) . . . . ? 
C1 N1 C4 S1 -173.5(15) . . . . ? 
Ag2 N1 C4 S1 18.9(18) . . . . ? 
C3 N2 C4 N1 -4(3) . . . . ? 
Ag1 N2 C4 N1 -177.6(14) 4_565 . . . ? 
C3 N2 C4 S1 174.1(13) . . . . ? 
Ag1 N2 C4 S1 0.3(19) 4_565 . . . ? 
C5 S1 C4 N1 -109.6(14) . . . . ? 
C5 S1 C4 N2 72.4(15) . . . . ? 
C8 N3 C5 N4 -4(3) . . . . ? 
Ag1 N3 C5 N4 -178.5(13) . . . . ? 
C8 N3 C5 S1 179.5(13) . . . . ? 
Ag1 N3 C5 S1 4.7(16) . . . . ? 
C6 N4 C5 N3 1(3) . . . . ? 
C6 N4 C5 S1 177.7(13) . . . . ? 
C4 S1 C5 N3 179.8(12) . . . . ? 
C4 S1 C5 N4 2.9(15) . . . . ? 
C5 N4 C6 C7 3(3) . . . . ? 
N4 C6 C7 C8 -4(3) . . . . ? 
C5 N3 C8 C7 2(3) . . . . ? 
Ag1 N3 C8 C7 177.1(15) . . . . ? 
C6 C7 C8 N3 1(3) . . . . ? 
O2 Ag2 O4 C12 118(3) . . . . ? 
N1 Ag2 O4 C12 17(3) . . . . ? 
Ag2 O4 C12 O3 93(3) . . . . ? 
Ag2 O4 C12 C13 -109(3) . . . . ? 
O4 C12 C13 F21 -63(3) . . . . ? 
O3 C12 C13 F21 99(3) . . . . ? 
O4 C12 C13 F22 175(3) . . . . ? 
O3 C12 C13 F22 -24(3) . . . . ? 
O4 C12 C13 C14 60(3) . . . . ? 
O3 C12 C13 C14 -139(2) . . . . ? 
F21 C13 C14 F25 71(3) . . . . ? 
C12 C13 C14 F25 -61(3) . . . . ? 
F22 C13 C14 F25 172(3) . . . . ? 
F21 C13 C14 F23 -167(3) . . . . ? 
C12 C13 C14 F23 61(2) . . . . ? 
F22 C13 C14 F23 -67(3) . . . . ? 
F21 C13 C14 F24 -48(3) . . . . ? 
C12 C13 C14 F24 -180(2) . . . . ? 
F22 C13 C14 F24 53(3) . . . . ? 
O4 Ag2 O2 C9 56(5) . . . . ? 
N1 Ag2 O2 C9 176(5) . . . . ? 
Ag2 O2 C9 O1 26(7) . . . . ? 
Ag2 O2 C9 C10 -146(4) . . . . ? 
Ag1 O1 C9 O2 2(4) 3_667 . . . ? 
Ag1 O1 C9 C10 174.1(15) 3_667 . . . ? 
O2 C9 C10 F11 -111(3) . . . . ? 
O1 C9 C10 F11 76(3) . . . . ? 
O2 C9 C10 C11 117(3) . . . . ? 
O1 C9 C10 C11 -56(3) . . . . ? 
O2 C9 C10 F12 1(4) . . . . ? 
O1 C9 C10 F12 -172(3) . . . . ? 
F11 C10 C11 F15 -179(2) . . . . ? 
F12 C10 C11 F15 75(3) . . . . ? 
C9 C10 C11 F15 -50(3) . . . . ? 
F11 C10 C11 F14 55(3) . . . . ? 
F12 C10 C11 F14 -51(3) . . . . ? 
C9 C10 C11 F14 -176(2) . . . . ? 
F11 C10 C11 F13 -61(2) . . . . ? 
F12 C10 C11 F13 -167(2) . . . . ? 
C9 C10 C11 F13 68(3) . . . . ? 
 
_diffrn_measured_fraction_theta_max    0.999 
_diffrn_reflns_theta_full              25.01 
_diffrn_measured_fraction_theta_full   0.999 
_refine_diff_density_max    1.176 
_refine_diff_density_min   -1.065 
_refine_diff_density_rms    0.207 

####################################END###################

 
data_complex4 
 
_audit_creation_method            SHELXL-97 
_chemical_name_systematic 
; 
 ? 
; 
_chemical_name_common             ? 
_chemical_melting_point           ? 
_chemical_formula_moiety          ? 
_chemical_formula_sum 
 'C8 H6 Ag N5 O3 S' 
_chemical_formula_weight          360.11 
 
loop_ 
 _atom_type_symbol 
 _atom_type_description 
 _atom_type_scat_dispersion_real 
 _atom_type_scat_dispersion_imag 
 _atom_type_scat_source 
 'C'  'C'   0.0033   0.0016 
 'International Tables Vol C Tables 4.2.6.8 and 6.1.1.4' 
 'H'  'H'   0.0000   0.0000 
 'International Tables Vol C Tables 4.2.6.8 and 6.1.1.4' 
 'N'  'N'   0.0061   0.0033 
 'International Tables Vol C Tables 4.2.6.8 and 6.1.1.4' 
 'O'  'O'   0.0106   0.0060 
 'International Tables Vol C Tables 4.2.6.8 and 6.1.1.4' 
 'S'  'S'   0.1246   0.1234 
 'International Tables Vol C Tables 4.2.6.8 and 6.1.1.4' 
 'Ag'  'Ag'  -0.8971   1.1015 
 'International Tables Vol C Tables 4.2.6.8 and 6.1.1.4' 
 
_symmetry_cell_setting            orthorhombic 
_symmetry_space_group_name_H-M    P2(1)2(1)2(1) 
 
loop_ 
 _symmetry_equiv_pos_as_xyz 
 'x, y, z' 
 '-x+1/2, -y, z+1/2' 
 '-x, y+1/2, -z+1/2' 
 'x+1/2, -y+1/2, -z' 
 
_cell_length_a                    6.4342(2) 
_cell_length_b                    7.9231(3) 
_cell_length_c                    21.6589(8) 
_cell_angle_alpha                 90.00 
_cell_angle_beta                  90.00 
_cell_angle_gamma                 90.00 
_cell_volume                      1104.15(7) 
_cell_formula_units_Z             4 
_cell_measurement_temperature     296(2) 
_cell_measurement_reflns_used     ? 
_cell_measurement_theta_min       ? 
_cell_measurement_theta_max       ? 
 
_exptl_crystal_description        block 
_exptl_crystal_colour             colorless 
_exptl_crystal_size_max           0.44 
_exptl_crystal_size_mid           0.32 
_exptl_crystal_size_min           0.30 
_exptl_crystal_density_meas       ? 
_exptl_crystal_density_diffrn     2.166 
_exptl_crystal_density_method     'not measured' 
_exptl_crystal_F_000              704 
_exptl_absorpt_coefficient_mu     2.023 
_exptl_absorpt_correction_type    multi-scan 
_exptl_absorpt_correction_T_min   0.572510  
_exptl_absorpt_correction_T_max   1.000000 
_exptl_absorpt_process_details    SADABS 
 
_exptl_special_details 
; 
 ? 
; 
 
_diffrn_ambient_temperature       296(2) 
_diffrn_radiation_wavelength      0.71073 
_diffrn_radiation_type            MoK\a 
_diffrn_radiation_source          'fine-focus sealed tube' 
_diffrn_radiation_monochromator   graphite 
_diffrn_measurement_device_type   ? 
_diffrn_measurement_method        ? 
_diffrn_detector_area_resol_mean  ? 
_diffrn_standards_number          ? 
_diffrn_standards_interval_count  ? 
_diffrn_standards_interval_time   ? 
_diffrn_standards_decay_%         ? 
_diffrn_reflns_number             13483 
_diffrn_reflns_av_R_equivalents   0.0259 
_diffrn_reflns_av_sigmaI/netI     0.0233 
_diffrn_reflns_limit_h_min        -8 
_diffrn_reflns_limit_h_max        8 
_diffrn_reflns_limit_k_min        -10 
_diffrn_reflns_limit_k_max        10 
_diffrn_reflns_limit_l_min        -28 
_diffrn_reflns_limit_l_max        20 
_diffrn_reflns_theta_min          1.88 
_diffrn_reflns_theta_max          27.89 
_reflns_number_total              2634 
_reflns_number_gt                 2492 
_reflns_threshold_expression      >2sigma(I) 
 
_computing_data_collection        'Bruker Smart ApexII detector'
_computing_cell_refinement        'Bruker Smart ApexII'
_computing_data_reduction         'Bruker Sanit' 
_computing_structure_solution     'SHELXS-97 (Sheldrick, 1990)' 
_computing_structure_refinement   'SHELXL-97 (Sheldrick, 1997)' 
_computing_molecular_graphics     'Bruker SHELXTL' 
_computing_publication_material   'Bruker SHELXTL' 
 
_refine_special_details 
; 
 Refinement of F^2^ against ALL reflections.  The weighted R-factor wR and 
 goodness of fit S are based on F^2^, conventional R-factors R are based 
 on F, with F set to zero for negative F^2^. The threshold expression of 
 F^2^ > 2sigma(F^2^) is used only for calculating R-factors(gt) etc. and is 
 not relevant to the choice of reflections for refinement.  R-factors based 
 on F^2^ are statistically about twice as large as those based on F, and R- 
 factors based on ALL data will be even larger. 
; 
 
_refine_ls_structure_factor_coef  Fsqd  
_refine_ls_matrix_type            full 
_refine_ls_weighting_scheme       calc  
_refine_ls_weighting_details 
 'calc w=1/[\s^2^(Fo^2^)+(0.0275P)^2^+0.2097P] where P=(Fo^2^+2Fc^2^)/3' 
_atom_sites_solution_primary      direct 
_atom_sites_solution_secondary    difmap 
_atom_sites_solution_hydrogens    geom 
_refine_ls_hydrogen_treatment     constr
_refine_ls_extinction_method      none 
_refine_ls_extinction_coef        ? 
_refine_ls_abs_structure_details 
 'Flack H D (1983), Acta Cryst. A39, 876-881' 
_refine_ls_abs_structure_Flack    0.00(3) 
_refine_ls_number_reflns          2634 
_refine_ls_number_parameters      163 
_refine_ls_number_restraints      0 
_refine_ls_R_factor_all           0.0236 
_refine_ls_R_factor_gt            0.0217 
_refine_ls_wR_factor_ref          0.0521 
_refine_ls_wR_factor_gt           0.0512 
_refine_ls_goodness_of_fit_ref    1.053 
_refine_ls_restrained_S_all       1.053 
_refine_ls_shift/su_max           0.001 
_refine_ls_shift/su_mean          0.000 
 
loop_ 
 _atom_site_label 
 _atom_site_type_symbol 
 _atom_site_fract_x 
 _atom_site_fract_y 
 _atom_site_fract_z 
 _atom_site_U_iso_or_equiv 
 _atom_site_adp_type 
 _atom_site_occupancy 
 _atom_site_symmetry_multiplicity 
 _atom_site_calc_flag 
 _atom_site_refinement_flags 
 _atom_site_disorder_assembly 
 _atom_site_disorder_group 
Ag1 Ag 0.48405(3) 0.31933(2) 0.403294(9) 0.04096(7) Uani 1 1 d . . . 
S1 S 0.47505(10) 0.19574(7) 0.54600(2) 0.03150(12) Uani 1 1 d . . . 
N1 N 0.6708(3) 0.1241(3) 0.65116(10) 0.0363(5) Uani 1 1 d . . . 
N2 N 0.3043(3) 0.0958(3) 0.65086(10) 0.0377(5) Uani 1 1 d . . . 
N3 N 0.5164(3) 0.4834(2) 0.49289(8) 0.0299(4) Uani 1 1 d . . . 
N4 N 0.5283(3) 0.4933(2) 0.60319(9) 0.0359(4) Uani 1 1 d . . . 
C1 C 0.6739(4) 0.0694(5) 0.70983(13) 0.0484(7) Uani 1 1 d . . . 
H1A H 0.8004 0.0627 0.7305 0.058 Uiso 1 1 calc R . . 
C2 C 0.4961(5) 0.0231(4) 0.74011(11) 0.0469(6) Uani 1 1 d . . . 
H2A H 0.5003 -0.0165 0.7805 0.056 Uiso 1 1 calc R . . 
C3 C 0.3133(4) 0.0372(5) 0.70917(13) 0.0500(8) Uani 1 1 d . . . 
H3A H 0.1909 0.0053 0.7288 0.060 Uiso 1 1 calc R . . 
C4 C 0.4846(4) 0.1357(2) 0.62546(10) 0.0267(4) Uani 1 1 d . . . 
C5 C 0.5104(4) 0.4152(2) 0.54946(9) 0.0265(4) Uani 1 1 d . . . 
C6 C 0.5589(5) 0.6610(3) 0.59924(14) 0.0494(6) Uani 1 1 d . . . 
H6A H 0.5716 0.7234 0.6354 0.059 Uiso 1 1 calc R . . 
C7 C 0.5719(5) 0.7422(3) 0.54407(15) 0.0503(7) Uani 1 1 d . . . 
H7A H 0.5960 0.8579 0.5424 0.060 Uiso 1 1 calc R . . 
C8 C 0.5488(4) 0.6506(3) 0.49107(13) 0.0417(6) Uani 1 1 d . . . 
H8A H 0.5556 0.7050 0.4531 0.050 Uiso 1 1 calc R . . 
N5 N 0.5327(4) -0.0326(3) 0.35763(10) 0.0428(5) Uani 1 1 d . . . 
O1 O 0.5296(3) 0.0122(2) 0.41307(8) 0.0492(5) Uani 1 1 d . . . 
O2 O 0.5189(4) 0.0765(3) 0.31640(8) 0.0555(5) Uani 1 1 d . . . 
O3 O 0.5498(5) -0.1845(3) 0.34404(11) 0.0773(8) Uani 1 1 d . . . 
 
loop_ 
 _atom_site_aniso_label 
 _atom_site_aniso_U_11 
 _atom_site_aniso_U_22 
 _atom_site_aniso_U_33 
 _atom_site_aniso_U_23 
 _atom_site_aniso_U_13 
 _atom_site_aniso_U_12 
Ag1 0.03652(9) 0.05274(12) 0.03362(11) -0.00181(8) -0.00091(9) 0.00157(10) 
S1 0.0460(3) 0.0285(2) 0.0200(2) 0.0025(2) -0.0026(2) -0.0063(3) 
N1 0.0312(10) 0.0528(15) 0.0248(11) 0.0065(10) -0.0036(8) -0.0027(9) 
N2 0.0327(10) 0.0493(14) 0.0310(12) 0.0071(10) 0.0032(8) 0.0022(9) 
N3 0.0324(9) 0.0317(9) 0.0257(9) 0.0053(7) 0.0030(8) 0.0027(9) 
N4 0.0429(10) 0.0367(10) 0.0281(10) -0.0062(8) -0.0007(10) 0.0000(9) 
C1 0.0416(14) 0.074(2) 0.0299(15) 0.0105(16) -0.0082(11) 0.0022(13) 
C2 0.0535(15) 0.0629(16) 0.0245(11) 0.0138(11) 0.0031(13) 0.0043(17) 
C3 0.0423(14) 0.075(2) 0.0326(16) 0.0181(16) 0.0112(11) -0.0033(14) 
C4 0.0325(10) 0.0267(9) 0.0209(9) 0.0011(8) 0.0004(10) -0.0007(9) 
C5 0.0243(9) 0.0275(9) 0.0277(10) 0.0012(8) 0.0015(9) 0.0012(9) 
C6 0.0598(14) 0.0382(14) 0.0501(17) -0.0136(13) 0.0012(14) -0.0017(12) 
C7 0.0639(18) 0.0252(11) 0.0618(18) -0.0015(13) 0.0103(15) 0.0001(11) 
C8 0.0464(13) 0.0332(12) 0.0456(15) 0.0116(11) 0.0092(12) 0.0054(11) 
N5 0.0470(12) 0.0450(12) 0.0364(11) -0.0066(10) 0.0029(10) -0.0034(10) 
O1 0.0659(13) 0.0555(11) 0.0263(9) -0.0062(7) 0.0021(10) -0.0011(10) 
O2 0.0732(14) 0.0585(12) 0.0347(10) 0.0041(9) -0.0001(11) 0.0047(13) 
O3 0.126(2) 0.0450(12) 0.0605(14) -0.0156(10) 0.0090(15) 0.0042(17) 
 
_geom_special_details 
; 
 All esds (except the esd in the dihedral angle between two l.s. planes) 
 are estimated using the full covariance matrix.  The cell esds are taken 
 into account individually in the estimation of esds in distances, angles 
 and torsion angles; correlations between esds in cell parameters are only 
 used when they are defined by crystal symmetry.  An approximate (isotropic) 
 treatment of cell esds is used for estimating esds involving l.s. planes. 
; 
 
loop_ 
 _geom_bond_atom_site_label_1 
 _geom_bond_atom_site_label_2 
 _geom_bond_distance 
 _geom_bond_site_symmetry_2 
 _geom_bond_publ_flag 
Ag1 N3 2.3449(18) . ? 
Ag1 N1 2.378(2) 4_456 ? 
Ag1 O1 2.460(2) . ? 
Ag1 N2 2.464(2) 4_556 ? 
S1 C5 1.756(2) . ? 
S1 C4 1.787(2) . ? 
N1 C4 1.324(3) . ? 
N1 C1 1.343(3) . ? 
N1 Ag1 2.378(2) 4_556 ? 
N2 C4 1.322(3) . ? 
N2 C3 1.347(4) . ? 
N2 Ag1 2.464(2) 4_456 ? 
N3 C5 1.339(3) . ? 
N3 C8 1.342(3) . ? 
N4 C5 1.323(3) . ? 
N4 C6 1.347(3) . ? 
C1 C2 1.368(4) . ? 
C1 H1A 0.9300 . ? 
C2 C3 1.358(4) . ? 
C2 H2A 0.9300 . ? 
C3 H3A 0.9300 . ? 
C6 C7 1.360(4) . ? 
C6 H6A 0.9300 . ? 
C7 C8 1.366(4) . ? 
C7 H7A 0.9300 . ? 
C8 H8A 0.9300 . ? 
N5 O3 1.244(3) . ? 
N5 O2 1.246(3) . ? 
N5 O1 1.252(2) . ? 
 
loop_ 
 _geom_angle_atom_site_label_1 
 _geom_angle_atom_site_label_2 
 _geom_angle_atom_site_label_3 
 _geom_angle 
 _geom_angle_site_symmetry_1 
 _geom_angle_site_symmetry_3 
 _geom_angle_publ_flag 
N3 Ag1 N1 112.41(7) . 4_456 ? 
N3 Ag1 O1 117.80(6) . . ? 
N1 Ag1 O1 109.28(7) 4_456 . ? 
N3 Ag1 N2 99.70(7) . 4_556 ? 
N1 Ag1 N2 114.91(7) 4_456 4_556 ? 
O1 Ag1 N2 102.19(7) . 4_556 ? 
C5 S1 C4 102.61(10) . . ? 
C4 N1 C1 115.7(2) . . ? 
C4 N1 Ag1 123.04(15) . 4_556 ? 
C1 N1 Ag1 121.17(17) . 4_556 ? 
C4 N2 C3 115.8(2) . . ? 
C4 N2 Ag1 118.07(16) . 4_456 ? 
C3 N2 Ag1 125.21(18) . 4_456 ? 
C5 N3 C8 115.4(2) . . ? 
C5 N3 Ag1 122.08(14) . . ? 
C8 N3 Ag1 122.47(16) . . ? 
C5 N4 C6 114.7(2) . . ? 
N1 C1 C2 121.8(2) . . ? 
N1 C1 H1A 119.1 . . ? 
C2 C1 H1A 119.1 . . ? 
C3 C2 C1 117.7(2) . . ? 
C3 C2 H2A 121.1 . . ? 
C1 C2 H2A 121.1 . . ? 
N2 C3 C2 121.9(2) . . ? 
N2 C3 H3A 119.1 . . ? 
C2 C3 H3A 119.1 . . ? 
N2 C4 N1 127.0(2) . . ? 
N2 C4 S1 115.73(18) . . ? 
N1 C4 S1 117.04(17) . . ? 
N4 C5 N3 127.87(19) . . ? 
N4 C5 S1 120.79(15) . . ? 
N3 C5 S1 111.34(15) . . ? 
N4 C6 C7 122.1(3) . . ? 
N4 C6 H6A 118.9 . . ? 
C7 C6 H6A 118.9 . . ? 
C6 C7 C8 118.7(2) . . ? 
C6 C7 H7A 120.7 . . ? 
C8 C7 H7A 120.7 . . ? 
N3 C8 C7 121.1(2) . . ? 
N3 C8 H8A 119.4 . . ? 
C7 C8 H8A 119.4 . . ? 
O3 N5 O2 120.5(2) . . ? 
O3 N5 O1 120.2(2) . . ? 
O2 N5 O1 119.3(2) . . ? 
N5 O1 Ag1 101.52(14) . . ? 
 
loop_ 
 _geom_torsion_atom_site_label_1 
 _geom_torsion_atom_site_label_2 
 _geom_torsion_atom_site_label_3 
 _geom_torsion_atom_site_label_4 
 _geom_torsion 
 _geom_torsion_site_symmetry_1 
 _geom_torsion_site_symmetry_2 
 _geom_torsion_site_symmetry_3 
 _geom_torsion_site_symmetry_4 
 _geom_torsion_publ_flag 
N1 Ag1 N3 C5 112.75(18) 4_456 . . . ? 
O1 Ag1 N3 C5 -15.7(2) . . . . ? 
N2 Ag1 N3 C5 -125.06(18) 4_556 . . . ? 
N1 Ag1 N3 C8 -69.4(2) 4_456 . . . ? 
O1 Ag1 N3 C8 162.16(18) . . . . ? 
N2 Ag1 N3 C8 52.7(2) 4_556 . . . ? 
C4 N1 C1 C2 2.2(5) . . . . ? 
Ag1 N1 C1 C2 -174.6(2) 4_556 . . . ? 
N1 C1 C2 C3 -1.2(5) . . . . ? 
C4 N2 C3 C2 1.2(5) . . . . ? 
Ag1 N2 C3 C2 -167.2(2) 4_456 . . . ? 
C1 C2 C3 N2 -0.6(5) . . . . ? 
C3 N2 C4 N1 -0.1(4) . . . . ? 
Ag1 N2 C4 N1 169.26(18) 4_456 . . . ? 
C3 N2 C4 S1 174.7(2) . . . . ? 
Ag1 N2 C4 S1 -16.0(2) 4_456 . . . ? 
C1 N1 C4 N2 -1.6(4) . . . . ? 
Ag1 N1 C4 N2 175.10(19) 4_556 . . . ? 
C1 N1 C4 S1 -176.3(2) . . . . ? 
Ag1 N1 C4 S1 0.4(2) 4_556 . . . ? 
C5 S1 C4 N2 105.68(19) . . . . ? 
C5 S1 C4 N1 -79.0(2) . . . . ? 
C6 N4 C5 N3 -1.0(4) . . . . ? 
C6 N4 C5 S1 178.7(2) . . . . ? 
C8 N3 C5 N4 1.5(4) . . . . ? 
Ag1 N3 C5 N4 179.46(19) . . . . ? 
C8 N3 C5 S1 -178.26(18) . . . . ? 
Ag1 N3 C5 S1 -0.3(2) . . . . ? 
C4 S1 C5 N4 -2.4(3) . . . . ? 
C4 S1 C5 N3 177.43(17) . . . . ? 
C5 N4 C6 C7 -0.5(4) . . . . ? 
N4 C6 C7 C8 1.3(5) . . . . ? 
C5 N3 C8 C7 -0.5(4) . . . . ? 
Ag1 N3 C8 C7 -178.4(2) . . . . ? 
C6 C7 C8 N3 -0.8(4) . . . . ? 
O3 N5 O1 Ag1 -178.5(2) . . . . ? 
O2 N5 O1 Ag1 1.6(3) . . . . ? 
N3 Ag1 O1 N5 -170.99(16) . . . . ? 
N1 Ag1 O1 N5 59.15(19) 4_456 . . . ? 
N2 Ag1 O1 N5 -63.00(18) 4_556 . . . ? 
 
_diffrn_measured_fraction_theta_max    0.997 
_diffrn_reflns_theta_full              27.89 
_diffrn_measured_fraction_theta_full   0.997 
_refine_diff_density_max    0.269 
_refine_diff_density_min   -0.898 
_refine_diff_density_rms    0.106 

########################################END##########

 
data_complex5 
 
_audit_creation_method            SHELXL-97 
_chemical_name_systematic 
; 
 ? 
; 
_chemical_name_common             ? 
_chemical_melting_point           ? 
_chemical_formula_moiety          ? 
_chemical_formula_sum 
 'C24 H18 Ag3 Cl3 N12 O12 S3' 
_chemical_formula_weight          1192.64 
 
loop_ 
 _atom_type_symbol 
 _atom_type_description 
 _atom_type_scat_dispersion_real 
 _atom_type_scat_dispersion_imag 
 _atom_type_scat_source 
 'C'  'C'   0.0033   0.0016 
 'International Tables Vol C Tables 4.2.6.8 and 6.1.1.4' 
 'H'  'H'   0.0000   0.0000 
 'International Tables Vol C Tables 4.2.6.8 and 6.1.1.4' 
 'N'  'N'   0.0061   0.0033 
 'International Tables Vol C Tables 4.2.6.8 and 6.1.1.4' 
 'O'  'O'   0.0106   0.0060 
 'International Tables Vol C Tables 4.2.6.8 and 6.1.1.4' 
 'S'  'S'   0.1246   0.1234 
 'International Tables Vol C Tables 4.2.6.8 and 6.1.1.4' 
 'Cl'  'Cl'   0.1484   0.1585 
 'International Tables Vol C Tables 4.2.6.8 and 6.1.1.4' 
 'Ag'  'Ag'  -0.8971   1.1015 
 'International Tables Vol C Tables 4.2.6.8 and 6.1.1.4' 
 
_symmetry_cell_setting            Triclinic  
_symmetry_space_group_name_H-M    P-1 
 
loop_ 
 _symmetry_equiv_pos_as_xyz 
 'x, y, z' 
 '-x, -y, -z' 
 
_cell_length_a                    11.9403(4) 
_cell_length_b                    12.0036(3) 
_cell_length_c                    15.6419(4) 
_cell_angle_alpha                 69.201(2) 
_cell_angle_beta                  70.396(2) 
_cell_angle_gamma                 79.961(2) 
_cell_volume                      1970.44(10) 
_cell_formula_units_Z             2 
_cell_measurement_temperature     296(2) 
_cell_measurement_reflns_used     ? 
_cell_measurement_theta_min       ? 
_cell_measurement_theta_max       ? 
 
_exptl_crystal_description        Stick 
_exptl_crystal_colour             colorless 
_exptl_crystal_size_max           0.40 
_exptl_crystal_size_mid           0.22 
_exptl_crystal_size_min           0.15 
_exptl_crystal_density_meas       ? 
_exptl_crystal_density_diffrn     2.010 
_exptl_crystal_density_method     'not measured' 
_exptl_crystal_F_000              1164 
_exptl_absorpt_coefficient_mu     1.910 
_exptl_absorpt_correction_type    multi-scan 
_exptl_absorpt_correction_T_min   0.608412 
_exptl_absorpt_correction_T_max   1.000000 
_exptl_absorpt_process_details    sadabs  
 
_exptl_special_details 
; 
 ? 
; 
 
_diffrn_ambient_temperature       296(2) 
_diffrn_radiation_wavelength      0.71073 
_diffrn_radiation_type            MoK\a 
_diffrn_radiation_source          'fine-focus sealed tube' 
_diffrn_radiation_monochromator   graphite 
_diffrn_measurement_device_type   ? 
_diffrn_measurement_method        ? 
_diffrn_detector_area_resol_mean  ? 
_diffrn_standards_number          ? 
_diffrn_standards_interval_count  ? 
_diffrn_standards_interval_time   ? 
_diffrn_standards_decay_%         ? 
_diffrn_reflns_number             29368 
_diffrn_reflns_av_R_equivalents   0.0486 
_diffrn_reflns_av_sigmaI/netI     0.0412 
_diffrn_reflns_limit_h_min        -14 
_diffrn_reflns_limit_h_max        14 
_diffrn_reflns_limit_k_min        -14 
_diffrn_reflns_limit_k_max        14 
_diffrn_reflns_limit_l_min        -18 
_diffrn_reflns_limit_l_max        18 
_diffrn_reflns_theta_min          1.46 
_diffrn_reflns_theta_max          25.01 
_reflns_number_total              6876 
_reflns_number_gt                 4969 
_reflns_threshold_expression      >2sigma(I) 
 
_computing_data_collection        'Bruker Smart ApexII detector' 
_computing_cell_refinement        'Bruker Smart ApexII' 
_computing_data_reduction         'Bruker Saint' 
_computing_structure_solution     'SHELXS-97 (Sheldrick, 1990)' 
_computing_structure_refinement   'SHELXL-97 (Sheldrick, 1997)' 
_computing_molecular_graphics     'Bruker SHELXTL' 
_computing_publication_material   'Bruker SHELXTL' 
 
_refine_special_details 
; 
 Refinement of F^2^ against ALL reflections.  The weighted R-factor wR and 
 goodness of fit S are based on F^2^, conventional R-factors R are based 
 on F, with F set to zero for negative F^2^. The threshold expression of 
 F^2^ > 2sigma(F^2^) is used only for calculating R-factors(gt) etc. and is 
 not relevant to the choice of reflections for refinement.  R-factors based 
 on F^2^ are statistically about twice as large as those based on F, and R- 
 factors based on ALL data will be even larger. 
; 
 
_refine_ls_structure_factor_coef  Fsqd  
_refine_ls_matrix_type            full 
_refine_ls_weighting_scheme       calc  
_refine_ls_weighting_details 
 'calc w=1/[\s^2^(Fo^2^)+(0.0411P)^2^+32.1698P] where P=(Fo^2^+2Fc^2^)/3' 
_atom_sites_solution_primary      direct 
_atom_sites_solution_secondary    difmap 
_atom_sites_solution_hydrogens    geom 
_refine_ls_hydrogen_treatment     constr 
_refine_ls_extinction_method      SHELXL 
_refine_ls_extinction_coef        0.0021(3) 
_refine_ls_extinction_expression 
 'Fc^*^=kFc[1+0.001xFc^2^\l^3^/sin(2\q)]^-1/4^' 
_refine_ls_number_reflns          6876 
_refine_ls_number_parameters      558 
_refine_ls_number_restraints      0 
_refine_ls_R_factor_all           0.1138 
_refine_ls_R_factor_gt            0.0882 
_refine_ls_wR_factor_ref          0.2137 
_refine_ls_wR_factor_gt           0.2015 
_refine_ls_goodness_of_fit_ref    1.118 
_refine_ls_restrained_S_all       1.118 
_refine_ls_shift/su_max           0.001 
_refine_ls_shift/su_mean          0.000 
 
loop_ 
 _atom_site_label 
 _atom_site_type_symbol 
 _atom_site_fract_x 
 _atom_site_fract_y 
 _atom_site_fract_z 
 _atom_site_U_iso_or_equiv 
 _atom_site_adp_type 
 _atom_site_occupancy 
 _atom_site_symmetry_multiplicity 
 _atom_site_calc_flag 
 _atom_site_refinement_flags 
 _atom_site_disorder_assembly 
 _atom_site_disorder_group 
Ag1 Ag 0.47636(11) 0.08714(10) 0.23132(7) 0.0739(4) Uani 1 1 d . A . 
Ag2 Ag 0.30480(10) 0.54348(9) 0.15387(7) 0.0637(4) Uani 1 1 d . . . 
S1 S 0.3012(3) 0.2790(3) 0.3218(2) 0.0552(8) Uani 1 1 d . . . 
S2 S 0.4855(3) 0.3404(3) 0.0612(2) 0.0502(7) Uani 1 1 d . . . 
N4 N 0.4827(11) 0.3046(9) 0.3755(9) 0.069(3) Uani 1 1 d . . . 
N3 N 0.4277(9) 0.4631(9) 0.2493(7) 0.053(2) Uani 1 1 d . . . 
N2 N 0.2473(10) 0.1354(8) 0.5027(7) 0.058(3) Uani 1 1 d . . . 
N1 N 0.3923(10) 0.0605(9) 0.3864(7) 0.059(3) Uani 1 1 d . . . 
N5 N 0.2651(9) 0.4243(9) 0.0821(7) 0.055(3) Uani 1 1 d . . . 
N6 N 0.3288(11) 0.2783(11) 0.0014(9) 0.069(3) Uani 1 1 d . . . 
N7 N 0.5532(9) 0.1128(9) 0.0750(6) 0.052(2) Uani 1 1 d . . . 
N8 N 0.6165(9) 0.2544(8) -0.0789(7) 0.055(3) Uani 1 1 d . . . 
C6 C 0.5699(17) 0.3715(14) 0.3634(14) 0.095(6) Uani 1 1 d . . . 
H6A H 0.6180 0.3412 0.4037 0.114 Uiso 1 1 calc R . . 
C7 C 0.5920(17) 0.4801(15) 0.2962(15) 0.095(5) Uani 1 1 d . . . 
H7A H 0.6543 0.5228 0.2889 0.114 Uiso 1 1 calc R . . 
C8 C 0.5190(16) 0.5231(13) 0.2405(12) 0.085(5) Uani 1 1 d . . . 
H8A H 0.5320 0.5976 0.1938 0.102 Uiso 1 1 calc R . . 
C5 C 0.4166(11) 0.3561(10) 0.3170(8) 0.052(3) Uani 1 1 d . . . 
C4 C 0.3133(10) 0.1428(10) 0.4146(8) 0.048(3) Uani 1 1 d . A . 
C3 C 0.2589(14) 0.0325(12) 0.5689(10) 0.075(4) Uani 1 1 d . A . 
H3A H 0.2106 0.0224 0.6314 0.089 Uiso 1 1 calc R . . 
C2 C 0.3372(15) -0.0600(13) 0.5513(10) 0.081(5) Uani 1 1 d . . . 
H2A H 0.3456 -0.1306 0.5996 0.098 Uiso 1 1 calc R A . 
C1 C 0.4034(13) -0.0411(12) 0.4562(10) 0.069(4) Uani 1 1 d . A . 
H1A H 0.4577 -0.1015 0.4403 0.083 Uiso 1 1 calc R . . 
C9 C 0.1558(12) 0.4315(14) 0.0744(11) 0.072(4) Uani 1 1 d . . . 
H9A H 0.0990 0.4872 0.0955 0.087 Uiso 1 1 calc R . . 
C10 C 0.1251(17) 0.3585(17) 0.0359(13) 0.095(5) Uani 1 1 d . . . 
H10A H 0.0473 0.3583 0.0358 0.115 Uiso 1 1 calc R . . 
C11 C 0.2163(16) 0.2854(14) -0.0027(12) 0.083(5) Uani 1 1 d . . . 
H11A H 0.1993 0.2390 -0.0329 0.100 Uiso 1 1 calc R . . 
C12 C 0.3471(11) 0.3468(10) 0.0457(8) 0.047(3) Uani 1 1 d . . . 
C13 C 0.5580(10) 0.2219(10) 0.0133(7) 0.043(3) Uani 1 1 d . A . 
C14 C 0.6083(12) 0.0250(10) 0.0370(9) 0.059(3) Uani 1 1 d . A . 
H14A H 0.6059 -0.0538 0.0772 0.071 Uiso 1 1 calc R . . 
C15 C 0.6658(12) 0.0477(11) -0.0563(9) 0.060(3) Uani 1 1 d . . . 
H15A H 0.7033 -0.0134 -0.0814 0.072 Uiso 1 1 calc R A . 
C16 C 0.6675(14) 0.1634(13) -0.1129(9) 0.073(4) Uani 1 1 d . A . 
H16A H 0.7055 0.1806 -0.1783 0.088 Uiso 1 1 calc R . . 
N9 N -0.0257(11) 0.4543(10) 0.2980(7) 0.060(6) Uani 0.503(9) 1 d PG A 1 
C17 C -0.0818(12) 0.3587(13) 0.3036(9) 0.085(11) Uani 0.503(9) 1 d PG A 1 
H17A H -0.1161 0.3654 0.2565 0.102 Uiso 0.503(9) 1 calc PR A 1 
C18 C -0.0867(12) 0.2530(11) 0.3795(11) 0.14(2) Uani 0.503(9) 1 d PG A 1 
H18A H -0.1243 0.1891 0.3832 0.165 Uiso 0.503(9) 1 calc PR A 1 
C19 C -0.0355(11) 0.2430(8) 0.4499(9) 0.062(8) Uani 0.503(9) 1 d PG A 1 
H19A H -0.0388 0.1723 0.5007 0.075 Uiso 0.503(9) 1 calc PR A 1 
N10 N 0.0206(8) 0.3386(8) 0.4443(6) 0.063(6) Uani 0.503(9) 1 d PG A 1 
C20 C 0.0255(8) 0.4442(8) 0.3684(6) 0.068(11) Uani 0.503(9) 1 d PG A 1 
Ag3 Ag 0.1177(13) 0.2955(13) 0.5422(8) 0.098(4) Uani 0.503(9) 1 d PG . 1 
S3 S 0.0865(12) 0.5364(9) 0.3619(8) 0.093(6) Uani 0.503(9) 1 d PG A 1 
N10' N 0.2138(16) 0.6530(12) 0.3537(11) 0.15(2) Uani 0.497(9) 1 d PG A 2 
C19' C 0.2963(16) 0.6662(14) 0.3939(16) 0.083(12) Uani 0.497(9) 1 d PG A 2 
H19B H 0.3345 0.7370 0.3699 0.099 Uiso 0.497(9) 1 calc PR A 2 
C18' C 0.3218(15) 0.574(2) 0.4700(15) 0.33(6) Uani 0.497(9) 1 d PG A 2 
H18B H 0.3770 0.5823 0.4969 0.395 Uiso 0.497(9) 1 calc PR A 2 
C17' C 0.2648(15) 0.4677(16) 0.5059(10) 0.049(7) Uani 0.497(9) 1 d PG A 2 
H17B H 0.2818 0.4057 0.5569 0.058 Uiso 0.497(9) 1 calc PR A 2 
N9' N 0.1823(15) 0.4545(11) 0.4657(11) 0.101(11) Uani 0.497(9) 1 d PG A 2 
C20' C 0.1568(14) 0.5472(15) 0.3896(11) 0.092(17) Uani 0.497(9) 1 d PG A 2 
Ag3' Ag 0.1137(15) 0.2915(13) 0.5376(9) 0.119(5) Uani 0.497(9) 1 d P . 2 
S3' S 0.071(3) 0.531(2) 0.355(2) 0.217(19) Uani 0.497(9) 1 d P A 2 
C24 C -0.0598(13) 0.8319(12) 0.2248(9) 0.065(4) Uani 1 1 d . . . 
H24A H -0.1181 0.8897 0.2407 0.079 Uiso 1 1 calc R . . 
N12 N -0.0359(10) 0.7391(9) 0.2945(7) 0.056(3) Uani 1 1 d . . . 
C21 C 0.0486(13) 0.6620(13) 0.2670(9) 0.067(4) Uani 1 1 d . . . 
C22 C 0.0843(16) 0.7605(16) 0.1106(10) 0.088(5) Uani 1 1 d . . . 
H22A H 0.1244 0.7674 0.0469 0.105 Uiso 1 1 calc R A . 
N11 N 0.1133(13) 0.6680(12) 0.1787(8) 0.091(5) Uani 1 1 d . A . 
C23 C -0.0025(13) 0.8460(13) 0.1312(10) 0.069(4) Uani 1 1 d . A . 
H23A H -0.0213 0.9110 0.0829 0.083 Uiso 1 1 calc R . . 
Cl2 Cl 0.7769(4) 0.2250(5) 0.1533(3) 0.0879(13) Uani 1 1 d . . . 
O6 O 0.756(3) 0.3054(19) 0.0796(13) 0.278(18) Uani 1 1 d . . . 
O5 O 0.826(2) 0.1294(18) 0.1180(15) 0.249(14) Uani 1 1 d . . . 
O7 O 0.664(2) 0.208(2) 0.2178(15) 0.218(12) Uani 1 1 d . . . 
O8 O 0.827(2) 0.261(5) 0.194(3) 0.42(3) Uani 1 1 d . . . 
Cl1 Cl 0.6127(3) -0.2084(3) 0.2848(3) 0.0682(9) Uani 1 1 d . . . 
O4 O 0.6460(11) -0.0981(10) 0.2822(11) 0.115(5) Uani 1 1 d . . . 
O3 O 0.5154(14) -0.1803(14) 0.2475(11) 0.140(6) Uani 1 1 d . . . 
O2 O 0.5718(13) -0.2863(12) 0.3794(8) 0.118(5) Uani 1 1 d . . . 
O1 O 0.7039(13) -0.2573(13) 0.2256(12) 0.142(6) Uani 1 1 d . . . 
Cl3 Cl 0.1446(5) 0.0191(5) 0.2980(4) 0.0973(14) Uani 1 1 d . . . 
O9 O 0.062(3) -0.024(3) 0.283(3) 0.34(2) Uani 1 1 d . . . 
O10 O 0.250(2) -0.049(3) 0.2849(19) 0.249(14) Uani 1 1 d . . . 
O11 O 0.113(3) 0.0249(19) 0.3864(14) 0.269(16) Uani 1 1 d . . . 
O12 O 0.187(3) 0.122(2) 0.2356(18) 0.291(16) Uani 1 1 d . . . 
 
loop_ 
 _atom_site_aniso_label 
 _atom_site_aniso_U_11 
 _atom_site_aniso_U_22 
 _atom_site_aniso_U_33 
 _atom_site_aniso_U_23 
 _atom_site_aniso_U_13 
 _atom_site_aniso_U_12 
Ag1 0.0980(9) 0.0599(7) 0.0396(5) -0.0138(5) 0.0011(5) 0.0082(6) 
Ag2 0.0757(8) 0.0508(6) 0.0546(6) -0.0166(5) -0.0101(5) 0.0020(5) 
S1 0.063(2) 0.0437(17) 0.0455(17) -0.0060(13) -0.0108(15) 0.0034(14) 
S2 0.0521(18) 0.0452(16) 0.0525(17) -0.0223(14) -0.0120(14) 0.0065(13) 
N4 0.083(8) 0.042(6) 0.079(8) -0.010(6) -0.031(7) -0.003(6) 
N3 0.054(6) 0.043(6) 0.057(6) -0.013(5) -0.012(5) -0.009(5) 
N2 0.077(7) 0.039(5) 0.040(5) -0.012(4) 0.002(5) 0.001(5) 
N1 0.064(7) 0.045(6) 0.046(6) -0.011(5) 0.005(5) 0.006(5) 
N5 0.056(7) 0.053(6) 0.046(6) -0.016(5) -0.007(5) 0.008(5) 
N6 0.065(8) 0.078(8) 0.080(8) -0.044(7) -0.029(6) 0.011(6) 
N7 0.061(6) 0.052(6) 0.036(5) -0.013(5) -0.008(5) -0.002(5) 
N8 0.069(7) 0.037(5) 0.044(5) -0.014(4) -0.001(5) 0.004(5) 
C6 0.112(14) 0.058(10) 0.134(16) -0.010(10) -0.082(13) -0.003(9) 
C7 0.094(13) 0.064(11) 0.127(16) -0.025(11) -0.042(12) 0.003(9) 
C8 0.100(13) 0.050(9) 0.082(11) -0.019(8) -0.005(10) 0.008(9) 
C5 0.063(8) 0.043(7) 0.036(6) -0.012(5) -0.004(6) 0.012(6) 
C4 0.050(7) 0.044(6) 0.042(6) -0.018(5) -0.001(5) 0.001(5) 
C3 0.098(11) 0.048(8) 0.046(7) -0.006(6) 0.002(7) 0.007(7) 
C2 0.103(12) 0.062(9) 0.049(8) -0.007(7) -0.008(8) 0.016(8) 
C1 0.076(10) 0.050(8) 0.062(8) -0.015(7) -0.010(7) 0.017(7) 
C9 0.047(8) 0.077(10) 0.094(11) -0.037(9) -0.017(8) 0.008(7) 
C10 0.080(12) 0.096(13) 0.103(13) -0.036(11) -0.023(10) 0.014(10) 
C11 0.095(13) 0.069(10) 0.096(12) -0.044(9) -0.018(10) -0.014(9) 
C12 0.053(7) 0.041(6) 0.045(6) -0.015(5) -0.009(5) -0.004(5) 
C13 0.053(7) 0.040(6) 0.034(6) -0.015(5) -0.008(5) 0.001(5) 
C14 0.084(10) 0.027(6) 0.051(7) -0.012(5) -0.007(7) 0.007(6) 
C15 0.075(9) 0.047(7) 0.053(7) -0.020(6) -0.010(7) 0.000(6) 
C16 0.100(12) 0.069(9) 0.038(7) -0.027(7) 0.001(7) 0.003(8) 
N9 0.058(13) 0.045(12) 0.076(15) -0.025(11) 0.000(11) -0.027(10) 
C17 0.10(2) 0.12(3) 0.056(16) -0.022(17) -0.017(16) -0.08(2) 
C18 0.024(14) 0.057(19) 0.31(6) -0.09(3) 0.03(2) -0.032(13) 
C19 0.026(12) 0.023(11) 0.15(3) -0.037(14) -0.020(14) -0.008(9) 
N10 0.069(15) 0.043(11) 0.049(12) -0.014(10) 0.011(10) 0.008(10) 
C20 0.013(11) 0.15(3) 0.022(12) -0.020(16) -0.011(9) 0.032(16) 
Ag3 0.124(8) 0.094(8) 0.040(4) -0.020(4) -0.009(5) 0.054(6) 
S3 0.100(11) 0.088(14) 0.039(7) -0.002(7) -0.004(7) 0.052(10) 
N10' 0.12(3) 0.068(19) 0.10(2) 0.020(16) 0.09(2) 0.025(18) 
C19' 0.027(14) 0.052(16) 0.17(4) -0.040(19) -0.010(17) -0.037(12) 
C18' 0.019(18) 0.9(2) 0.17(5) -0.36(9) -0.06(2) 0.11(5) 
C17' 0.012(11) 0.096(19) 0.058(15) -0.035(14) -0.025(11) -0.002(11) 
N9' 0.12(2) 0.070(17) 0.065(16) -0.029(14) 0.038(16) 0.001(16) 
C20' 0.11(3) 0.022(13) 0.048(19) 0.015(13) 0.047(19) 0.034(17) 
Ag3' 0.158(11) 0.076(7) 0.059(6) -0.011(5) 0.014(6) 0.043(6) 
S3' 0.26(3) 0.12(2) 0.118(19) 0.029(15) 0.01(2) 0.10(2) 
C24 0.074(9) 0.064(9) 0.054(8) -0.023(7) -0.022(7) 0.020(7) 
N12 0.067(7) 0.054(6) 0.036(5) -0.012(5) -0.011(5) 0.013(5) 
C21 0.070(9) 0.070(9) 0.038(7) -0.011(6) -0.004(6) 0.014(7) 
C22 0.101(13) 0.102(13) 0.043(8) -0.021(8) -0.016(8) 0.018(10) 
N11 0.116(11) 0.079(9) 0.046(7) -0.017(6) -0.004(7) 0.030(8) 
C23 0.066(9) 0.071(9) 0.051(8) 0.000(7) -0.013(7) -0.006(7) 
Cl2 0.088(3) 0.121(4) 0.049(2) -0.015(2) -0.015(2) -0.029(3) 
O6 0.41(4) 0.151(17) 0.096(13) 0.009(12) 0.038(18) 0.08(2) 
O5 0.32(3) 0.143(16) 0.159(17) -0.031(14) 0.012(18) 0.099(18) 
O7 0.20(2) 0.26(2) 0.201(19) -0.141(18) 0.070(16) -0.149(18) 
O8 0.18(2) 0.86(9) 0.49(6) -0.51(6) -0.16(3) 0.03(4) 
Cl1 0.077(2) 0.059(2) 0.071(2) -0.0257(17) -0.0235(19) 0.0049(17) 
O4 0.093(9) 0.076(8) 0.205(15) -0.082(9) -0.040(9) -0.005(6) 
O3 0.136(12) 0.134(12) 0.147(13) 0.024(10) -0.094(11) -0.044(10) 
O2 0.157(13) 0.117(10) 0.060(7) -0.003(7) -0.039(8) 0.000(9) 
O1 0.109(10) 0.127(11) 0.188(15) -0.113(12) 0.036(10) -0.027(9) 
Cl3 0.099(3) 0.108(4) 0.089(3) -0.049(3) -0.013(3) -0.011(3) 
O9 0.37(4) 0.29(3) 0.49(5) -0.10(3) -0.24(4) -0.16(3) 
O10 0.26(3) 0.32(3) 0.23(2) -0.19(3) -0.11(2) 0.13(3) 
O11 0.42(4) 0.168(19) 0.127(15) -0.084(14) 0.05(2) 0.02(2) 
O12 0.38(4) 0.21(2) 0.18(2) 0.079(19) -0.05(2) -0.13(3) 
 
_geom_special_details 
; 
 All esds (except the esd in the dihedral angle between two l.s. planes) 
 are estimated using the full covariance matrix.  The cell esds are taken 
 into account individually in the estimation of esds in distances, angles 
 and torsion angles; correlations between esds in cell parameters are only 
 used when they are defined by crystal symmetry.  An approximate (isotropic) 
 treatment of cell esds is used for estimating esds involving l.s. planes. 
; 
 
loop_ 
 _geom_bond_atom_site_label_1 
 _geom_bond_atom_site_label_2 
 _geom_bond_distance 
 _geom_bond_site_symmetry_2 
 _geom_bond_publ_flag 
Ag1 N1 2.218(10) . ? 
Ag1 N7 2.231(9) . ? 
Ag2 N3 2.295(11) . ? 
Ag2 N5 2.295(11) . ? 
Ag2 N8 2.486(10) 2_665 ? 
Ag2 N11 2.498(13) . ? 
S1 C5 1.758(14) . ? 
S1 C4 1.783(12) . ? 
S2 C12 1.734(13) . ? 
S2 C13 1.796(11) . ? 
N4 C5 1.323(16) . ? 
N4 C6 1.348(19) . ? 
N3 C5 1.337(15) . ? 
N3 C8 1.35(2) . ? 
N2 C4 1.317(14) . ? 
N2 C3 1.321(15) . ? 
N2 Ag3' 2.336(18) . ? 
N2 Ag3 2.374(17) . ? 
N1 C4 1.329(14) . ? 
N1 C1 1.339(16) . ? 
N5 C9 1.336(17) . ? 
N5 C12 1.353(14) . ? 
N6 C12 1.332(15) . ? 
N6 C11 1.35(2) . ? 
N7 C13 1.320(14) . ? 
N7 C14 1.356(14) . ? 
N8 C13 1.320(13) . ? 
N8 C16 1.345(15) . ? 
N8 Ag2 2.486(10) 2_665 ? 
C6 C7 1.35(2) . ? 
C6 H6A 0.9300 . ? 
C7 C8 1.35(2) . ? 
C7 H7A 0.9300 . ? 
C8 H8A 0.9300 . ? 
C3 C2 1.366(19) . ? 
C3 H3A 0.9300 . ? 
C2 C1 1.386(18) . ? 
C2 H2A 0.9300 . ? 
C1 H1A 0.9300 . ? 
C9 C10 1.38(2) . ? 
C9 H9A 0.9300 . ? 
C10 C11 1.39(2) . ? 
C10 H10A 0.9300 . ? 
C11 H11A 0.9300 . ? 
C14 C15 1.336(16) . ? 
C14 H14A 0.9300 . ? 
C15 C16 1.356(18) . ? 
C15 H15A 0.9300 . ? 
C16 H16A 0.9300 . ? 
N9 C17 1.3900 . ? 
N9 C20 1.3900 . ? 
C17 C18 1.3900 . ? 
C17 H17A 0.9300 . ? 
C18 C19 1.3900 . ? 
C18 H18A 0.9300 . ? 
C19 N10 1.3900 . ? 
C19 H19A 0.9300 . ? 
N10 C20 1.3900 . ? 
N10 Ag3 2.0918 . ? 
C20 S3 1.3839 . ? 
Ag3 N12 2.316(15) 2_566 ? 
S3 C21 1.818(17) . ? 
N10' C19' 1.3900 . ? 
N10' C20' 1.3900 . ? 
C19' C18' 1.3900 . ? 
C19' H19B 0.9300 . ? 
C18' C17' 1.3900 . ? 
C18' H18B 0.9300 . ? 
C17' N9' 1.3900 . ? 
C17' H17B 0.9300 . ? 
N9' C20' 1.3900 . ? 
N9' Ag3' 2.03(2) . ? 
C20' S3' 1.38(4) . ? 
Ag3' N12 2.385(16) 2_566 ? 
S3' C21 1.73(2) . ? 
C24 N12 1.322(16) . ? 
C24 C23 1.355(18) . ? 
C24 H24A 0.9300 . ? 
N12 C21 1.313(16) . ? 
N12 Ag3 2.32(2) 2_566 ? 
N12 Ag3' 2.385(16) 2_566 ? 
C21 N11 1.320(16) . ? 
C22 N11 1.327(18) . ? 
C22 C23 1.37(2) . ? 
C22 H22A 0.9300 . ? 
C23 H23A 0.9300 . ? 
Cl2 O8 1.23(2) . ? 
Cl2 O6 1.28(2) . ? 
Cl2 O7 1.382(18) . ? 
Cl2 O5 1.40(2) . ? 
Cl1 O1 1.370(12) . ? 
Cl1 O3 1.408(13) . ? 
Cl1 O2 1.412(12) . ? 
Cl1 O4 1.430(11) . ? 
Cl3 O9 1.31(2) . ? 
Cl3 O12 1.33(2) . ? 
Cl3 O11 1.330(19) . ? 
Cl3 O10 1.38(2) . ? 
 
loop_ 
 _geom_angle_atom_site_label_1 
 _geom_angle_atom_site_label_2 
 _geom_angle_atom_site_label_3 
 _geom_angle 
 _geom_angle_site_symmetry_1 
 _geom_angle_site_symmetry_3 
 _geom_angle_publ_flag 
N1 Ag1 N7 177.5(4) . . ? 
N3 Ag2 N5 117.6(4) . . ? 
N3 Ag2 N8 96.7(4) . 2_665 ? 
N5 Ag2 N8 128.8(3) . 2_665 ? 
N3 Ag2 N11 130.8(4) . . ? 
N5 Ag2 N11 100.4(4) . . ? 
N8 Ag2 N11 80.4(4) 2_665 . ? 
C5 S1 C4 101.1(6) . . ? 
C12 S2 C13 99.1(5) . . ? 
C5 N4 C6 113.9(12) . . ? 
C5 N3 C8 114.4(12) . . ? 
C5 N3 Ag2 124.4(9) . . ? 
C8 N3 Ag2 121.2(10) . . ? 
C4 N2 C3 115.4(10) . . ? 
C4 N2 Ag3' 122.0(8) . . ? 
C3 N2 Ag3' 122.6(9) . . ? 
C4 N2 Ag3 123.0(8) . . ? 
C3 N2 Ag3 121.6(9) . . ? 
Ag3' N2 Ag3 2.9(6) . . ? 
C4 N1 C1 115.2(10) . . ? 
C4 N1 Ag1 119.8(8) . . ? 
C1 N1 Ag1 124.4(8) . . ? 
C9 N5 C12 117.4(12) . . ? 
C9 N5 Ag2 119.0(9) . . ? 
C12 N5 Ag2 123.6(8) . . ? 
C12 N6 C11 115.3(12) . . ? 
C13 N7 C14 115.5(9) . . ? 
C13 N7 Ag1 119.3(7) . . ? 
C14 N7 Ag1 124.8(8) . . ? 
C13 N8 C16 114.7(10) . . ? 
C13 N8 Ag2 117.6(7) . 2_665 ? 
C16 N8 Ag2 122.3(9) . 2_665 ? 
N4 C6 C7 124.0(16) . . ? 
N4 C6 H6A 118.0 . . ? 
C7 C6 H6A 118.0 . . ? 
C8 C7 C6 116.7(18) . . ? 
C8 C7 H7A 121.7 . . ? 
C6 C7 H7A 121.7 . . ? 
C7 C8 N3 123.1(15) . . ? 
C7 C8 H8A 118.5 . . ? 
N3 C8 H8A 118.5 . . ? 
N4 C5 N3 127.9(13) . . ? 
N4 C5 S1 119.5(9) . . ? 
N3 C5 S1 112.6(10) . . ? 
N2 C4 N1 127.3(11) . . ? 
N2 C4 S1 117.7(8) . . ? 
N1 C4 S1 115.0(8) . . ? 
N2 C3 C2 124.1(13) . . ? 
N2 C3 H3A 117.9 . . ? 
C2 C3 H3A 117.9 . . ? 
C3 C2 C1 115.1(13) . . ? 
C3 C2 H2A 122.4 . . ? 
C1 C2 H2A 122.4 . . ? 
N1 C1 C2 122.8(12) . . ? 
N1 C1 H1A 118.6 . . ? 
C2 C1 H1A 118.6 . . ? 
N5 C9 C10 121.7(14) . . ? 
N5 C9 H9A 119.2 . . ? 
C10 C9 H9A 119.2 . . ? 
C9 C10 C11 116.4(17) . . ? 
C9 C10 H10A 121.8 . . ? 
C11 C10 H10A 121.8 . . ? 
N6 C11 C10 123.3(15) . . ? 
N6 C11 H11A 118.4 . . ? 
C10 C11 H11A 118.4 . . ? 
N6 C12 N5 125.6(12) . . ? 
N6 C12 S2 120.0(9) . . ? 
N5 C12 S2 114.4(9) . . ? 
N8 C13 N7 127.0(10) . . ? 
N8 C13 S2 116.2(8) . . ? 
N7 C13 S2 116.7(8) . . ? 
C15 C14 N7 122.2(11) . . ? 
C15 C14 H14A 118.9 . . ? 
N7 C14 H14A 118.9 . . ? 
C14 C15 C16 117.4(12) . . ? 
C14 C15 H15A 121.3 . . ? 
C16 C15 H15A 121.3 . . ? 
N8 C16 C15 123.0(12) . . ? 
N8 C16 H16A 118.5 . . ? 
C15 C16 H16A 118.5 . . ? 
C17 N9 C20 120.0 . . ? 
N9 C17 C18 120.0 . . ? 
N9 C17 H17A 120.0 . . ? 
C18 C17 H17A 120.0 . . ? 
C19 C18 C17 120.0 . . ? 
C19 C18 H18A 120.0 . . ? 
C17 C18 H18A 120.0 . . ? 
C18 C19 N10 120.0 . . ? 
C18 C19 H19A 120.0 . . ? 
N10 C19 H19A 120.0 . . ? 
C20 N10 C19 120.0 . . ? 
C20 N10 Ag3 125.3 . . ? 
C19 N10 Ag3 113.8 . . ? 
S3 C20 N10 119.1 . . ? 
S3 C20 N9 120.9 . . ? 
N10 C20 N9 120.0 . . ? 
N10 Ag3 N12 125.2(6) . 2_566 ? 
N10 Ag3 N2 100.9(5) . . ? 
N12 Ag3 N2 113.6(6) 2_566 . ? 
C20 S3 C21 104.0(7) . . ? 
C19' N10' C20' 120.0 . . ? 
N10' C19' C18' 120.0 . . ? 
N10' C19' H19B 120.0 . . ? 
C18' C19' H19B 120.0 . . ? 
C19' C18' C17' 120.0 . . ? 
C19' C18' H18B 120.0 . . ? 
C17' C18' H18B 120.0 . . ? 
N9' C17' C18' 120.0 . . ? 
N9' C17' H17B 120.0 . . ? 
C18' C17' H17B 120.0 . . ? 
C20' N9' C17' 120.0 . . ? 
C20' N9' Ag3' 130.5(11) . . ? 
C17' N9' Ag3' 109.5(11) . . ? 
S3' C20' N9' 117.5(16) . . ? 
S3' C20' N10' 122.4(16) . . ? 
N9' C20' N10' 120.0 . . ? 
N9' Ag3' N2 112.9(9) . . ? 
N9' Ag3' N12 111.2(9) . 2_566 ? 
N2 Ag3' N12 112.4(6) . 2_566 ? 
C20' S3' C21 109(2) . . ? 
N12 C24 C23 122.4(12) . . ? 
N12 C24 H24A 118.8 . . ? 
C23 C24 H24A 118.8 . . ? 
C21 N12 C24 115.5(11) . . ? 
C21 N12 Ag3 117.1(9) . 2_566 ? 
C24 N12 Ag3 127.2(9) . 2_566 ? 
C21 N12 Ag3' 117.1(9) . 2_566 ? 
C24 N12 Ag3' 127.0(9) . 2_566 ? 
Ag3 N12 Ag3' 2.5(7) 2_566 2_566 ? 
N12 C21 N11 127.7(12) . . ? 
N12 C21 S3' 116.7(14) . . ? 
N11 C21 S3' 115.4(14) . . ? 
N12 C21 S3 116.2(10) . . ? 
N11 C21 S3 116.0(11) . . ? 
S3' C21 S3 8.3(15) . . ? 
N11 C22 C23 122.1(13) . . ? 
N11 C22 H22A 119.0 . . ? 
C23 C22 H22A 119.0 . . ? 
C21 N11 C22 115.1(13) . . ? 
C21 N11 Ag2 118.8(10) . . ? 
C22 N11 Ag2 124.2(10) . . ? 
C24 C23 C22 117.2(13) . . ? 
C24 C23 H23A 121.4 . . ? 
C22 C23 H23A 121.4 . . ? 
O8 Cl2 O6 114(3) . . ? 
O8 Cl2 O7 102.1(18) . . ? 
O6 Cl2 O7 102.2(18) . . ? 
O8 Cl2 O5 122(2) . . ? 
O6 Cl2 O5 101.7(14) . . ? 
O7 Cl2 O5 113.7(14) . . ? 
O1 Cl1 O3 107.5(11) . . ? 
O1 Cl1 O2 114.1(10) . . ? 
O3 Cl1 O2 106.4(9) . . ? 
O1 Cl1 O4 109.7(8) . . ? 
O3 Cl1 O4 106.7(9) . . ? 
O2 Cl1 O4 112.0(9) . . ? 
O9 Cl3 O12 118(2) . . ? 
O9 Cl3 O11 112(2) . . ? 
O12 Cl3 O11 109.5(18) . . ? 
O9 Cl3 O10 112(2) . . ? 
O12 Cl3 O10 97(2) . . ? 
O11 Cl3 O10 107.4(17) . . ? 
 
loop_ 
 _geom_torsion_atom_site_label_1 
 _geom_torsion_atom_site_label_2 
 _geom_torsion_atom_site_label_3 
 _geom_torsion_atom_site_label_4 
 _geom_torsion 
 _geom_torsion_site_symmetry_1 
 _geom_torsion_site_symmetry_2 
 _geom_torsion_site_symmetry_3 
 _geom_torsion_site_symmetry_4 
 _geom_torsion_publ_flag 
N5 Ag2 N3 C5 -47.8(10) . . . . ? 
N8 Ag2 N3 C5 171.5(9) 2_665 . . . ? 
N11 Ag2 N3 C5 88.3(10) . . . . ? 
N5 Ag2 N3 C8 132.4(10) . . . . ? 
N8 Ag2 N3 C8 -8.3(10) 2_665 . . . ? 
N11 Ag2 N3 C8 -91.4(11) . . . . ? 
N7 Ag1 N1 C4 -70(8) . . . . ? 
N7 Ag1 N1 C1 101(8) . . . . ? 
N3 Ag2 N5 C9 142.1(10) . . . . ? 
N8 Ag2 N5 C9 -91.7(11) 2_665 . . . ? 
N11 Ag2 N5 C9 -5.7(11) . . . . ? 
N3 Ag2 N5 C12 -38.6(10) . . . . ? 
N8 Ag2 N5 C12 87.6(10) 2_665 . . . ? 
N11 Ag2 N5 C12 173.6(9) . . . . ? 
N1 Ag1 N7 C13 95(8) . . . . ? 
N1 Ag1 N7 C14 -93(8) . . . . ? 
C5 N4 C6 C7 -2(3) . . . . ? 
N4 C6 C7 C8 2(3) . . . . ? 
C6 C7 C8 N3 0(3) . . . . ? 
C5 N3 C8 C7 -1(2) . . . . ? 
Ag2 N3 C8 C7 178.8(13) . . . . ? 
C6 N4 C5 N3 1(2) . . . . ? 
C6 N4 C5 S1 178.5(12) . . . . ? 
C8 N3 C5 N4 0.8(18) . . . . ? 
Ag2 N3 C5 N4 -179.0(10) . . . . ? 
C8 N3 C5 S1 -177.2(9) . . . . ? 
Ag2 N3 C5 S1 3.0(12) . . . . ? 
C4 S1 C5 N4 0.4(11) . . . . ? 
C4 S1 C5 N3 178.6(8) . . . . ? 
C3 N2 C4 N1 -3(2) . . . . ? 
Ag3' N2 C4 N1 179.6(11) . . . . ? 
Ag3 N2 C4 N1 176.4(11) . . . . ? 
C3 N2 C4 S1 179.6(11) . . . . ? 
Ag3' N2 C4 S1 2.0(15) . . . . ? 
Ag3 N2 C4 S1 -1.2(15) . . . . ? 
C1 N1 C4 N2 1(2) . . . . ? 
Ag1 N1 C4 N2 172.9(11) . . . . ? 
C1 N1 C4 S1 178.7(11) . . . . ? 
Ag1 N1 C4 S1 -9.5(14) . . . . ? 
C5 S1 C4 N2 92.8(11) . . . . ? 
C5 S1 C4 N1 -85.1(11) . . . . ? 
C4 N2 C3 C2 3(2) . . . . ? 
Ag3' N2 C3 C2 -179.1(14) . . . . ? 
Ag3 N2 C3 C2 -175.9(14) . . . . ? 
N2 C3 C2 C1 -2(3) . . . . ? 
C4 N1 C1 C2 0(2) . . . . ? 
Ag1 N1 C1 C2 -171.2(13) . . . . ? 
C3 C2 C1 N1 0(3) . . . . ? 
C12 N5 C9 C10 4(2) . . . . ? 
Ag2 N5 C9 C10 -177.1(13) . . . . ? 
N5 C9 C10 C11 -6(3) . . . . ? 
C12 N6 C11 C10 0(2) . . . . ? 
C9 C10 C11 N6 4(3) . . . . ? 
C11 N6 C12 N5 -3(2) . . . . ? 
C11 N6 C12 S2 176.8(11) . . . . ? 
C9 N5 C12 N6 1.2(19) . . . . ? 
Ag2 N5 C12 N6 -178.2(10) . . . . ? 
C9 N5 C12 S2 -178.6(10) . . . . ? 
Ag2 N5 C12 S2 2.1(12) . . . . ? 
C13 S2 C12 N6 -4.4(11) . . . . ? 
C13 S2 C12 N5 175.4(9) . . . . ? 
C16 N8 C13 N7 6(2) . . . . ? 
Ag2 N8 C13 N7 -148.8(10) 2_665 . . . ? 
C16 N8 C13 S2 -178.5(10) . . . . ? 
Ag2 N8 C13 S2 26.8(12) 2_665 . . . ? 
C14 N7 C13 N8 -4.7(19) . . . . ? 
Ag1 N7 C13 N8 168.5(10) . . . . ? 
C14 N7 C13 S2 179.8(9) . . . . ? 
Ag1 N7 C13 S2 -7.0(13) . . . . ? 
C12 S2 C13 N8 91.4(10) . . . . ? 
C12 S2 C13 N7 -92.6(10) . . . . ? 
C13 N7 C14 C15 1(2) . . . . ? 
Ag1 N7 C14 C15 -171.3(11) . . . . ? 
N7 C14 C15 C16 0(2) . . . . ? 
C13 N8 C16 C15 -4(2) . . . . ? 
Ag2 N8 C16 C15 149.2(13) 2_665 . . . ? 
C14 C15 C16 N8 2(2) . . . . ? 
C20 N9 C17 C18 0.0 . . . . ? 
N9 C17 C18 C19 0.0 . . . . ? 
C17 C18 C19 N10 0.0 . . . . ? 
C18 C19 N10 C20 0.0 . . . . ? 
C18 C19 N10 Ag3 -169.5 . . . . ? 
C19 N10 C20 S3 -177.1 . . . . ? 
Ag3 N10 C20 S3 -8.9 . . . . ? 
C19 N10 C20 N9 0.0 . . . . ? 
Ag3 N10 C20 N9 168.2 . . . . ? 
C17 N9 C20 S3 177.0 . . . . ? 
C17 N9 C20 N10 0.0 . . . . ? 
C20 N10 Ag3 N12 117.8(8) . . . 2_566 ? 
C19 N10 Ag3 N12 -73.4(8) . . . 2_566 ? 
C20 N10 Ag3 N2 -112.8(6) . . . . ? 
C19 N10 Ag3 N2 56.0(6) . . . . ? 
C4 N2 Ag3 N10 51.6(12) . . . . ? 
C3 N2 Ag3 N10 -129.2(12) . . . . ? 
Ag3' N2 Ag3 N10 -18(14) . . . . ? 
C4 N2 Ag3 N12 -171.9(11) . . . 2_566 ? 
C3 N2 Ag3 N12 7.3(15) . . . 2_566 ? 
Ag3' N2 Ag3 N12 118(15) . . . 2_566 ? 
N10 C20 S3 C21 -170.5(8) . . . . ? 
N9 C20 S3 C21 12.5(8) . . . . ? 
C20' N10' C19' C18' 0.0 . . . . ? 
N10' C19' C18' C17' 0.0 . . . . ? 
C19' C18' C17' N9' 0.0 . . . . ? 
C18' C17' N9' C20' 0.0 . . . . ? 
C18' C17' N9' Ag3' -178.5(11) . . . . ? 
C17' N9' C20' S3' -177(2) . . . . ? 
Ag3' N9' C20' S3' 1(2) . . . . ? 
C17' N9' C20' N10' 0.0 . . . . ? 
Ag3' N9' C20' N10' 178.2(14) . . . . ? 
C19' N10' C20' S3' 177(2) . . . . ? 
C19' N10' C20' N9' 0.0 . . . . ? 
C20' N9' Ag3' N2 107.8(11) . . . . ? 
C17' N9' Ag3' N2 -73.9(10) . . . . ? 
C20' N9' Ag3' N12 -124.7(10) . . . 2_566 ? 
C17' N9' Ag3' N12 53.6(11) . . . 2_566 ? 
C4 N2 Ag3' N9' -43.0(14) . . . . ? 
C3 N2 Ag3' N9' 139.6(13) . . . . ? 
Ag3 N2 Ag3' N9' 69(14) . . . . ? 
C4 N2 Ag3' N12 -169.9(10) . . . 2_566 ? 
C3 N2 Ag3' N12 12.7(16) . . . 2_566 ? 
Ag3 N2 Ag3' N12 -58(14) . . . 2_566 ? 
N9' C20' S3' C21 175.9(11) . . . . ? 
N10' C20' S3' C21 -1(3) . . . . ? 
C23 C24 N12 C21 1(2) . . . . ? 
C23 C24 N12 Ag3 176.9(14) . . . 2_566 ? 
C23 C24 N12 Ag3' 173.7(12) . . . 2_566 ? 
C24 N12 C21 N11 2(3) . . . . ? 
Ag3 N12 C21 N11 -174.8(16) 2_566 . . . ? 
Ag3' N12 C21 N11 -172.0(15) 2_566 . . . ? 
C24 N12 C21 S3' -172.9(18) . . . . ? 
Ag3 N12 C21 S3' 11(2) 2_566 . . . ? 
Ag3' N12 C21 S3' 14(2) 2_566 . . . ? 
C24 N12 C21 S3 177.8(11) . . . . ? 
Ag3 N12 C21 S3 1.5(18) 2_566 . . . ? 
Ag3' N12 C21 S3 4.4(17) 2_566 . . . ? 
C20' S3' C21 N12 -92(2) . . . . ? 
C20' S3' C21 N11 92(2) . . . . ? 
C20' S3' C21 S3 -4(8) . . . . ? 
C20 S3 C21 N12 99.1(13) . . . . ? 
C20 S3 C21 N11 -84.2(15) . . . . ? 
C20 S3 C21 S3' 4(9) . . . . ? 
N12 C21 N11 C22 -3(3) . . . . ? 
S3' C21 N11 C22 171(2) . . . . ? 
S3 C21 N11 C22 -179.8(14) . . . . ? 
N12 C21 N11 Ag2 161.2(13) . . . . ? 
S3' C21 N11 Ag2 -24(2) . . . . ? 
S3 C21 N11 Ag2 -15.1(18) . . . . ? 
C23 C22 N11 C21 3(3) . . . . ? 
C23 C22 N11 Ag2 -160.8(13) . . . . ? 
N3 Ag2 N11 C21 -23.6(16) . . . . ? 
N5 Ag2 N11 C21 117.9(13) . . . . ? 
N8 Ag2 N11 C21 -114.2(14) 2_665 . . . ? 
N3 Ag2 N11 C22 139.6(14) . . . . ? 
N5 Ag2 N11 C22 -79.0(15) . . . . ? 
N8 Ag2 N11 C22 49.0(15) 2_665 . . . ? 
N12 C24 C23 C22 -1(2) . . . . ? 
N11 C22 C23 C24 -1(3) . . . . ? 
 
_diffrn_measured_fraction_theta_max    0.990 
_diffrn_reflns_theta_full              25.01 
_diffrn_measured_fraction_theta_full   0.990 
_refine_diff_density_max    1.076 
_refine_diff_density_min   -0.840 
_refine_diff_density_rms    0.148 


##############END##################################
